# Supplementary material for: Synthesis of functionalized H-pyrazolo[5,1-a]isoquinolines via sequential reactions of N′-(2-alkynylbenzylidene)hydrazides
Source: Royal Society of Chemistry journal article supplement (doi:10.1039/b914265g), 2009-01-01

# Synthesis of functionalized *H*-pyrazolo[5,1-*a*]isoquinolines via sequential reactions of *N'*-(2-alkynylbenzylidene)hydrazides

Zhiyuan Chen,<sup>a</sup> Mingchao Su,<sup>a</sup> Xingxin Yu,<sup>a</sup> and Jie Wu<sup>\*a,b</sup>

<sup>a</sup>*Department of Chemistry, Fudan University, 220 Handan Road, Shanghai 200433, China, and*

<sup>b</sup>*State Key Laboratory of Organometallic Chemistry, Shanghai Institute of Organic Chemistry,  
Chinese Academy of Sciences, 354 Fenglin Road, Shanghai 200032, China*

jie\_wu@fudan.edu.cn

## Supporting Information

1. General experimental methods (S2)
2. General experimental procedure and characterization data (S2-S13).
3. <sup>1</sup>H and <sup>13</sup>C spectra of compound **6** and **7** (S14-S55).

### General experimental methods:

All reactions were performed in reaction tubes. Flash column chromatography was performed using silica gel (60-Å pore size, 32–63  $\mu\text{m}$ , standard grade). Analytical thin-layer chromatography was performed using glass plates pre-coated with 0.25 mm 230–400 mesh silica gel impregnated with a fluorescent indicator (254 nm). Thin layer chromatography plates were visualized by exposure to ultraviolet light. Organic solutions were concentrated on rotary evaporators at  $\sim 20$  Torr (house vacuum) at 25–35°C. Commercial reagents and solvents were used as received. Nuclear magnetic resonance (NMR) spectra are recorded in parts per million from internal tetramethylsilane on the  $\delta$  scale.

### General procedure for reactions of *N'*-(2-alkynylbenzylidene)hydrazides with bromine and alkynes

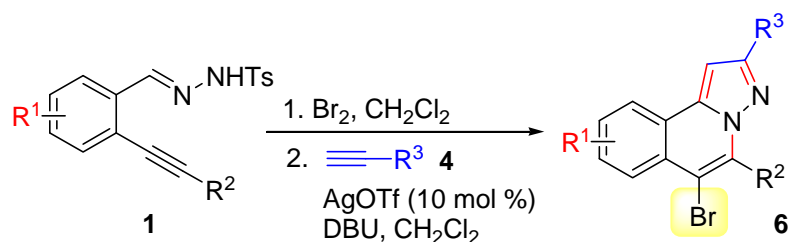

Bromine (0.3 mmol, 1.0 equiv) in 2.0 mL of  $\text{CH}_2\text{Cl}_2$  was added dropwisely to a mixture of *N'*-(2-alkynylbenzylidene)hydrazide **1** (0.30 mmol) in  $\text{CH}_2\text{Cl}_2$  (4.0 mL). The reaction was stirred at room temperature. After completion of reaction as indicated by TLC, the reaction mixture was then diluted with  $\text{CH}_2\text{Cl}_2$  (25 mL), washed with saturated aqueous  $\text{Na}_2\text{S}_2\text{O}_3$  (25 mL), dried ( $\text{Na}_2\text{SO}_4$ ) and filtered. The solvent was then evaporated and the residue was dissolved in 2.0 mL of  $\text{CH}_2\text{Cl}_2$ . Then  $\text{DBU}$  (2.5 equiv) and  $\text{AgOTf}$  (10 mol %) were added. Subsequently, alkyne **4** (1.5 equiv) in 1.0 mL of  $\text{CH}_2\text{Cl}_2$  was added dropwisely at room temperature under air atmosphere. The reaction mixture was stirred at room temperature for about 5 hours. After completion of reaction as indicated by TLC, the mixture was diluted with  $\text{CH}_2\text{Cl}_2$ , washed by water. The organic layer was combined, dried over  $\text{Na}_2\text{SO}_4$ , and purified by column chromatography on silica gel to afford the desired product **6**.

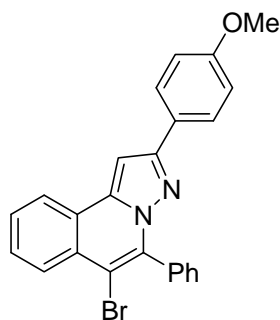

**6a.** 6-bromo-2-(4-methoxyphenyl)-5-phenylpyrazolo[5,1-a]isoquinoline

Yield: 91%;  $^1\text{H}$  NMR (400 MHz,  $\text{CDCl}_3$ ): 3.81 (s, 3H), 6.89-6.91 (m, 2H), 7.28 (s, 1H), 7.54-7.65 (m, 7H), 7.76-7.79 (m, 2H), 8.12-8.15 (m, 1H), 8.21-8.23 (m, 1H);  $^{13}\text{C}$  NMR (100 MHz,  $\text{CDCl}_3$ ):  $\delta$  55.4, 94.6, 108.5, 114.1, 123.8, 123.9, 125.8, 127.8, 127.9, 128.2, 128.3, 128.6, 128.7, 129.3, 130.7, 134.2, 137.9, 139.7, 152.6, 159.9; IR ( $\text{cm}^{-1}$ ): 2965, 2904, 2832, 1618, 1521, 1459, 1434, 1378, 1251, 1173, 1024;  $m/z$  (ESI): 429 ( $\text{M}^+\text{+H}$ ); HRMS calcd for  $\text{C}_{24}\text{H}_{18}\text{BrN}_2\text{O}$  ( $\text{M}+\text{H}$ ) 429.0603, found 429.0621.

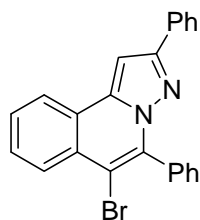

**6b.** 6-bromo-2,5-diphenylpyrazolo[5,1-a]isoquinoline

Yield: 70%;  $^1\text{H}$  NMR (400 MHz,  $\text{CDCl}_3$ ): 7.27-7.31 (m, 1H), 7.34-7.38 (m, 3H), 7.52-7.64 (m, 7H), 7.84-7.86 (m, 2H), 8.12-8.14 (m, 1H), 8.20-8.22 (m, 1H);  $^{13}\text{C}$  NMR (100 MHz,  $\text{CDCl}_3$ ):  $\delta$  95.1, 108.9, 123.7, 123.9, 126.5, 127.9, 128.3, 128.4, 128.5, 128.6, 128.7, 129.3, 130.7, 133.0, 134.1, 137.9, 139.7, 152.7. IR ( $\text{cm}^{-1}$ ): 3052, 2945, 2919, 2842, 1618, 1598, 1540, 1492, 1470, 1456, 1381, 1319, 1173, 1079;  $m/z$  (ESI): 399 ( $\text{M}^+\text{+H}$ ); HRMS calcd for  $\text{C}_{23}\text{H}_{16}\text{BrN}_2$  ( $\text{M}+\text{H}$ ) 399.0497, found 399.0513.

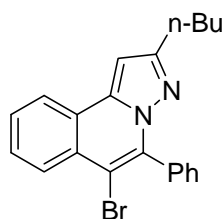

**6c.** 6-bromo-2-butyl-5-phenylpyrazolo[5,1-a]isoquinoline

Yield: 71%;  $^1\text{H}$  NMR (400 MHz,  $\text{CDCl}_3$ ): 0.92 (t,  $J = 7.3$  Hz, 3H), 1.36-1.41 (m, 2H),

1.64-1.71 (m, 2H), 2.75 (t,  $J = 7.80$  Hz, 2H), 6.86 (s, 1H), 7.51-7.62 (m, 7H), 8.05-8.07 (m, 1H), 8.16-8.19 (m, 1H);  $^{13}\text{C}$  NMR (100 MHz,  $\text{CDCl}_3$ )  $\delta$  14.0, 22.6, 28.4, 31.9, 96.7, 107.9, 123.6, 123.8, 127.7, 128.1, 128.4, 128.5, 129.3, 130.5, 134.4, 137.7, 139.0, 155.9. IR ( $\text{cm}^{-1}$ ): 3057, 2955, 2928, 2852, 1588, 1541, 1493, 1481, 1465, 1383, 1322;  $m/z$  (ESI): 379 ( $\text{M}^+\text{H}$ ); HRMS calcd for  $\text{C}_{21}\text{H}_{20}\text{BrN}_2$  ( $\text{M}+\text{H}$ ) 379.0810, found 379.0828.

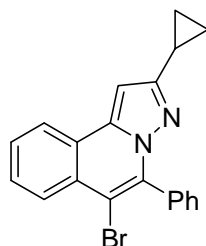

**6d.** 6-bromo-2-cyclopropyl-5-phenylpyrazolo[5,1-a]isoquinoline

Yield: 80%;  $^1\text{H}$  NMR (400 MHz,  $\text{CDCl}_3$ ): 0.74-0.78 (m, 2H), 0.93-0.99 (m, 2H), 2.04-2.12 (m, 1H), 6.61 (s, 1H), 7.51-7.61 (m, 7H), 8.00-8.02 (m, 1H), 8.16-8.18 (m, 1H);  $^{13}\text{C}$  NMR (100 MHz,  $\text{CDCl}_3$ )  $\delta$  9.31, 9.84, 93.2, 107.8, 123.5, 123.6, 127.7, 128.1, 128.4, 128.5, 129.3, 130.5, 134.3, 137.6, 139.1, 157.9. IR ( $\text{cm}^{-1}$ ): 2955, 2924, 2854, 1618, 1588, 1543, 1492, 1444, 1383, 1337, 1045;  $m/z$  (ESI): 363 ( $\text{M}^+\text{H}$ ); HRMS calcd for  $\text{C}_{20}\text{H}_{16}\text{BrN}_2$  ( $\text{M}+\text{H}$ ) 363.0497, found 363.0510.

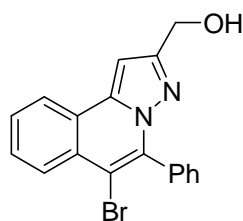

**6e.** (6-bromo-5-phenylpyrazolo[5,1-a]isoquinolin-2-yl)methanol

Yield: 82%;  $^1\text{H}$  NMR (400 MHz,  $\text{CDCl}_3$ ) : 4.70 (s, 2H), 7.00 (s, 1H), 7.45-7.62 (m, 7H), 8.01-8.04 (m, 1H), 8.15-8.18 (m, 1H);  $^{13}\text{C}$  NMR (100 MHz,  $\text{CDCl}_3$ )  $\delta$  59.0, 96.6, 109.1, 123.6, 123.7, 127.8, 128.3, 128.4, 128.6, 128.8, 129.5, 130.3, 134.0, 137.5, 139.2, 154.3. IR ( $\text{cm}^{-1}$ ): 3401, 3052, 2925, 2847, 1613, 1588, 1540, 1492, 1444, 1411, 1381, 1319, 1032;  $m/z$  (ESI): 353 ( $\text{M}^+\text{H}$ ); HRMS calcd for  $\text{C}_{18}\text{H}_{14}\text{BrN}_2\text{O}$  ( $\text{M}+\text{H}$ ) 353.0290, found 353.0304.

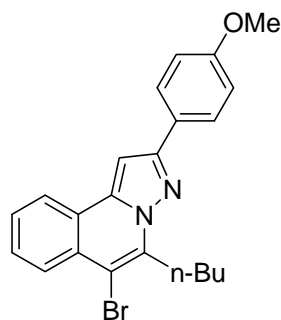

**6f.** 6-bromo-5-butyl-2-(4-methoxyphenyl)pyrazolo[5,1-a]isoquinoline

Yield: 72%;  $^1\text{H}$  NMR (400 MHz,  $\text{CDCl}_3$ ): 1.03 (t,  $J = 7.32$  Hz, 3H), 1.54-1.58 (m, 2H), 1.83-1.87 (m, 2H), 3.56 (t,  $J = 7.80$  Hz, 2H), 3.86 (s, 3H), 6.99-7.01 (m, 2H), 7.21 (s, 1H), 7.50-7.59 (m, 2H), 7.92-7.98 (m, 2H), 8.04-8.06 (m, 1H), 8.08-8.12 (m, 1H);  $^{13}\text{C}$  NMR (100 MHz,  $\text{CDCl}_3$ )  $\delta$  14.0, 22.9, 28.8, 31.3, 55.4, 94.4, 107.4, 114.2, 123.2, 123.6, 126.1, 127.1, 127.4, 127.7, 128.3, 128.4, 139.1, 139.5, 152.1, 159.9. IR ( $\text{cm}^{-1}$ ): 2960, 2919, 2852, 1613, 1525, 1460, 1437, 1316, 1250, 1174, 1029;  $m/z$  (ESI): 409 ( $\text{M}^+\text{+H}$ ); HRMS calcd. for  $\text{C}_{22}\text{H}_{22}\text{BrN}_2\text{O}$  ( $\text{M}+\text{H}$ ) 409.0916, found 409.0913.

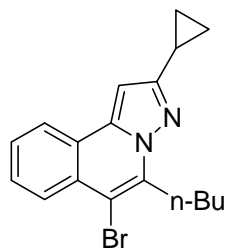

**6g.** 6-bromo-5-butyl-2-cyclopropylpyrazolo[5,1-a]isoquinoline

Yield: 61%;  $^1\text{H}$  NMR (400 MHz,  $\text{CDCl}_3$ ): 0.89-0.94 (m, 2H), 0.99 (t,  $J = 7.36$  Hz, 3H), 1.03-1.07 (m, 2H), 1.47-1.56 (m, 2H), 1.74-1.81 (m, 2H), 2.14-2.19 (m, 1H), 3.48 (t,  $J = 7.36$  Hz, 2H), 6.64 (s, 1H), 7.46-7.57 (m, 2H), 7.94-7.97 (m, 1H), 8.06-8.08 (m, 1H);  $^{13}\text{C}$  NMR (100 MHz,  $\text{CDCl}_3$ )  $\delta$  9.15, 9.77, 14.0, 22.8, 28.9, 31.3, 94.1, 106.7, 122.9, 123.5, 127.0, 127.2, 128.3, 128.4, 138.6, 139.3, 157.1. IR ( $\text{cm}^{-1}$ ): 2956, 2926, 2847, 1618, 1598, 1541, 1496, 1449, 1392, 1316, 1070;  $m/z$  (ESI): 343 ( $\text{M}^+\text{+H}$ ); HRMS calcd. for  $\text{C}_{18}\text{H}_{20}\text{BrN}_2$  ( $\text{M}+\text{H}$ ) 343.0810, found 343.0819.

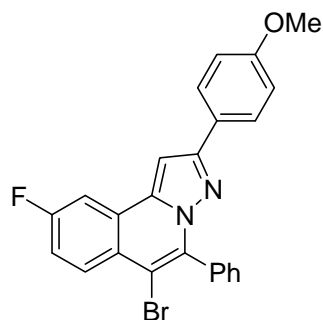

**6h.** 6-bromo-9-fluoro-2-(4-methoxyphenyl)-5-phenylpyrazolo[5,1-a]isoquinoline

Yield: 50%;  $^1\text{H}$  NMR (400 MHz,  $\text{CDCl}_3$ ): 3.82 (s, 3H), 6.89-6.92 (m, 2H), 7.24 (s, 1H), 7.33-7.37 (m, 1H), 7.54-7.60 (m, 5H), 7.75-7.81 (m, 3H), 8.20-8.24 (m, 1H);  $^{13}\text{C}$  NMR (100 MHz,  $\text{CDCl}_3$ )  $\delta$  55.4, 95.2, 107.8, 108.9 (d,  $^2J_{\text{CF}} = 22.9$  Hz), 114.1, 117.1 (d,  $^2J_{\text{CF}} = 22.9$  Hz), 125.1, 125.2, 125.5, 127.8, 128.4, 129.4, 130.6, 130.7, 133.9, 137.3, 138.9, 152.7, 160.0, 162.2 (d,  $^1J_{\text{CF}} = 248.9$  Hz). IR ( $\text{cm}^{-1}$ ): 2960, 2924, 2842, 1603, 1516, 1485, 1458, 1434, 1372, 1250, 1178, 1034;  $m/z$  (ESI): 447 ( $\text{M}^+\text{H}$ ); HRMS calcd for  $\text{C}_{24}\text{H}_{17}\text{BrFN}_2\text{O}$  ( $\text{M}+\text{H}$ ) 447.0508, found 447.0512.

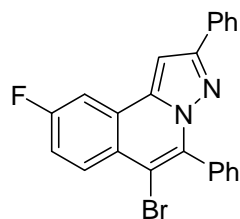

**6i.** 6-bromo-9-fluoro-2,5-diphenylpyrazolo[5,1-a]isoquinoline

Yield: 60%;  $^1\text{H}$  NMR (400 MHz,  $\text{CDCl}_3$ ): 7.35-7.54 (m, 7H), 7.59-7.65 (m, 1H), 7.70-7.73 (m, 4H), 8.14-8.17 (m, 1H), 8.38-8.41 (m, 1H);  $^{13}\text{C}$  NMR (100 MHz,  $\text{CDCl}_3$ )  $\delta$  86.1, 95.5, 110.9 (d,  $^2J_{\text{CF}} = 21.9$  Hz), 118.1, 119.2, 121.8, 122.4 (d,  $^2J_{\text{CF}} = 25.7$  Hz), 124.4, 128.1, 128.6, 129.7, 129.9, 132.3, 133.6, 140.3, 142.6, 147.2, 152.5, 161.9 (d,  $^1J_{\text{CF}} = 250.8$  Hz). IR ( $\text{cm}^{-1}$ ): 3057, 2960, 2919, 2842, 1618, 1546, 1493, 1439, 1419, 1393, 1301, 1170;  $m/z$  (ESI): 317 ( $\text{M}^+\text{H}$ ); HRMS calcd for  $\text{C}_{23}\text{H}_{15}\text{BrFN}_2$  ( $\text{M}+\text{H}$ ) 417.0403, found 417.0413.

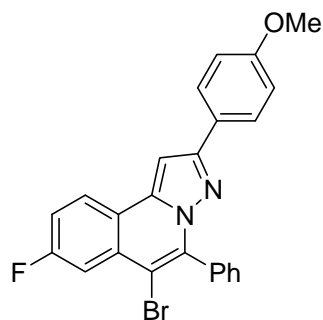

**6j.** 6-bromo-8-fluoro-2-(4-methoxyphenyl)-5-phenylpyrazolo[5,1-a]isoquinoline

Yield: 65%;  $^1\text{H}$  NMR (400 MHz,  $\text{CDCl}_3$ ): 3.80 (s, 3H), 6.87-6.89 (m, 2H), 7.18 (s, 1H), 7.29-7.34 (m, 1H), 7.54-7.58 (m, 5H), 7.73-7.76 (m, 2H), 7.85-7.89 (m, 1H), 8.06-8.10 (m, 1H);  $^{13}\text{C}$  NMR (100 MHz,  $\text{CDCl}_3$ )  $\delta$  55.3, 94.3, 107.2, 113.4 (d,  $^2J_{CF} = 24.8$  Hz), 114.0, 116.8 (d,  $^2J_{CF} = 23.8$  Hz), 120.4, 125.5, 126.1, 127.7, 128.3, 129.4, 130.6, 130.7, 133.9, 138.9, 139.3, 152.8, 159.9, 162.6 (d,  $^1J_{CF} = 246.9$  Hz). IR ( $\text{cm}^{-1}$ ): 3057, 2924, 2831, 1614, 1518, 1477, 1451, 1437, 1380, 1250, 1171, 1026;  $m/z$  (ESI): 447 ( $\text{M}^+\text{+H}$ ); HRMS calcd for  $\text{C}_{24}\text{H}_{17}\text{BrFN}_2\text{O}$  ( $\text{M}+\text{H}$ ) 447.0508, found 447.0515.

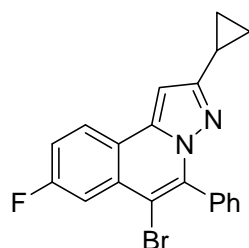

**6k.** 6-bromo-2-cyclopropyl-8-fluoro-5-phenylpyrazolo[5,1-a]isoquinoline

Yield: 65%;  $^1\text{H}$  NMR (400 MHz,  $\text{CDCl}_3$ ): 0.74-0.79 (m, 2H), 0.96-0.99 (m, 2H), 2.04-2.08 (m, 1H), 6.56 (s, 1H), 7.27-7.32 (m, 1H), 7.51-7.59 (m, 5H), 7.84-7.87 (m, 1H), 7.99-8.03 (m, 1H);  $^{13}\text{C}$  NMR (100 MHz,  $\text{CDCl}_3$ )  $\delta$  9.33, 9.83, 93.1, 113.3 (d,  $^2J_{CF} = 24.8$  Hz), 116.7 (d,  $^2J_{CF} = 23.8$  Hz), 120.2, 125.9, 126.1, 128.5, 129.5, 130.3, 130.6, 134.0, 138.7, 138.8, 158.3, 162.5 (d,  $^1J_{CF} = 246.0$  Hz). IR ( $\text{cm}^{-1}$ ): 3052, 2961, 2909, 2852, 1621, 1544, 1499, 1445, 1398, 1378, 1268, 1166;  $m/z$  (ESI): 381 ( $\text{M}^+\text{+H}$ ); HRMS calcd. for  $\text{C}_{20}\text{H}_{15}\text{BrFN}_2$  ( $\text{M}+\text{H}$ ) 381.0403, found 381.0412.

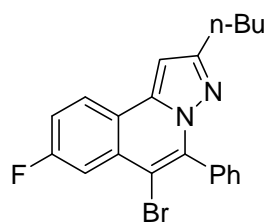

**6l.** 6-bromo-2-butyl-8-fluoro-5-phenylpyrazolo[5,1-a]isoquinoline

Yield: 60%;  $^1\text{H}$  NMR (400 MHz,  $\text{CDCl}_3$ ): 0.92 (t,  $J = 7.32$  Hz, 3H), 1.34-1.41 (m, 2H), 1.64-1.68 (m, 2H), 2.74 (t,  $J = 7.80$  Hz, 2H), 6.81 (s, 1H), 7.29-7.34 (m, 1H), 7.50-7.56 (m, 5H), 7.85-7.88 (m, 1H), 8.03-8.07 (m, 1H);  $^{13}\text{C}$  NMR (100 MHz,  $\text{CDCl}_3$ )  $\delta$  13.9, 22.6, 28.3, 31.9, 96.5, 106.7, 113.3 (d,  $^2J_{\text{CF}} = 24.8$  Hz), 116.7 (d,  $^2J_{\text{CF}} = 23.8$  Hz), 120.4, 126.1, 128.5, 129.5, 130.4, 130.5, 130.6, 134.1, 138.7, 156.3, 162.5 (d,  $^1J_{\text{CF}} = 246.9$  Hz). IR ( $\text{cm}^{-1}$ ): 3057, 2955, 2927, 2858, 1621, 1541, 1484, 1444, 1398, 1378, 1311, 1269, 1166;  $m/z$  (ESI): 397 ( $\text{M}^+\text{H}$ ); HRMS calcd. for  $\text{C}_{21}\text{H}_{19}\text{BrFN}_2$  ( $\text{M}+\text{H}$ ) 397.0716, found 397.0715.

**General procedure for palladium-catalyzed Suzuki couplings of 6-bromoH-pyrazolo[5,1-a]isoquinoline 6**

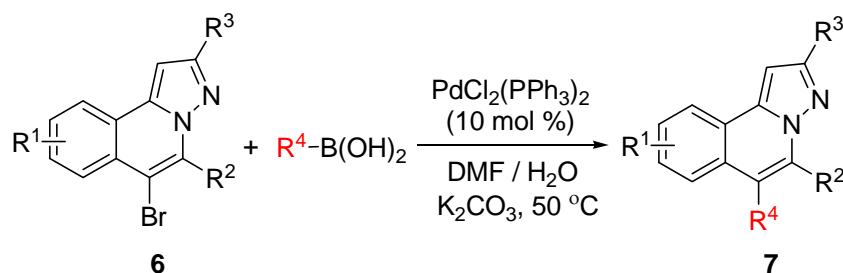

A mixture of 6-bromoH-pyrazolo[5,1-a]isoquinoline **6** (0.12 mmol), arylboronic acid (1.2 equiv),  $\text{PdCl}_2(\text{PPh}_3)_2$  (10 mol %) and  $\text{K}_2\text{CO}_3$  (2.0 equiv) in 1.0 mL of  $\text{DMF}/\text{H}_2\text{O}$  (5:1, v/v) was stirred under  $\text{N}_2$  atmosphere at  $50\sim 60\text{ }^\circ\text{C}$ . After completion of reaction as indicated by TLC, the mixture was cooled to room temperature and water (10 mL) was added. The mixture was extracted with ethyl acetate ( $5.0\text{ mL} \times 3$ ) and the organic layer was combined, which was then washed with brine, dried over  $\text{Na}_2\text{SO}_4$ , and purified by column chromatography on silica gel to afford the desired product **7**.



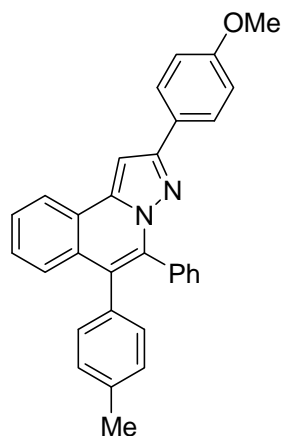

**7a.** 2-(4-methoxyphenyl)-5-phenyl-6-p-tolylpyrazolo[5,1-a]isoquinoline

Yield: 80%;  $^1\text{H}$  NMR (400 MHz,  $\text{CDCl}_3$ ): 2.32 (s, 3H), 3.81 (s, 3H), 6.88-6.92 (m, 2H), 7.05-7.09 (m, 4H), 7.26-7.29 (m, 3H), 7.32 (s, 1H), 7.38-7.44 (m, 4H), 7.52-7.55 (m, 1H), 7.82-7.85 (m, 2H), 8.18 (d  $J = 8.24$  Hz, 1H);  $^{13}\text{C}$  NMR (100 MHz,  $\text{CDCl}_3$ )  $\delta$  21.3, 55.4, 94.1, 114.0, 123.5, 123.6, 123.9, 126.3, 126.9, 127.2, 127.5, 127.6, 127.7, 128.0, 128.8, 130.3, 131.5, 131.6, 133.3, 133.4, 136.4, 136.7, 139.9, 152.1, 159.7. IR ( $\text{cm}^{-1}$ ): 2945, 2914, 2837, 1608, 1526, 1458, 1429, 1248, 1163, 1024;  $m/z$  (ESI): 441 ( $\text{M}^++\text{H}$ ); HRMS calcd. for  $\text{C}_{31}\text{H}_{25}\text{N}_2\text{O}$  ( $\text{M}+\text{H}$ ) 441.1967, found 441.1980.

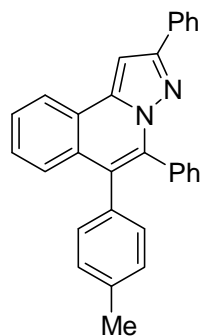

**7b.** 2,5-diphenyl-6-p-tolylpyrazolo[5,1-a]isoquinoline

Yield: 83%;  $^1\text{H}$  NMR (400 MHz,  $\text{CDCl}_3$ ): 2.33 (s, 3H), 7.06-7.11 (m, 4H), 7.24-7.32 (m, 4H), 7.36-7.44 (m, 7H), 7.53-7.59 (m, 1H), 7.90-7.93 (m, 2H), 8.20-8.23 (m, 1H);  $^{13}\text{C}$  NMR (100 MHz,  $\text{CDCl}_3$ )  $\delta$  21.3, 94.6, 123.6, 123.9, 124.0, 126.5, 126.9, 127.3, 127.6, 127.7, 128.0, 128.1, 128.6, 128.8, 130.3, 131.5, 131.6, 133.3, 133.5, 136.5, 136.8, 139.9, 152.2. IR ( $\text{cm}^{-1}$ ): 3052, 3016, 2914, 2858, 1588, 1536, 1506, 1456, 1378, 1342, 1178, 1081, 1014;  $m/z$  (ESI): 411 ( $\text{M}^++\text{H}$ ); HRMS calcd. for  $\text{C}_{30}\text{H}_{23}\text{N}_2$  ( $\text{M}+\text{H}$ ) 411.1861, found 411.1873.

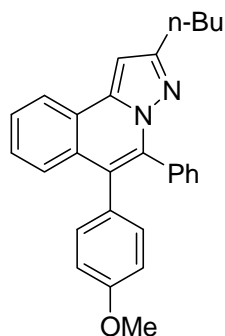

**7c.** 2-butyl-6-(4-methoxyphenyl)-5-phenylpyrazolo[5,1-a]isoquinoline

Yield: 84%;  $^1\text{H}$  NMR (400 MHz,  $\text{CDCl}_3$ ): 0.94 (t,  $J = 7.32$  Hz, 3H), 1.39-1.45 (m, 2H), 1.68-1.74 (m, 2H), 2.80 (t,  $J = 7.80$  Hz, 2H), 3.78 (s, 3H), 6.77-6.81 (m, 2H), 6.91 (s, 1H), 7.04-7.08 (m, 2H), 7.24-7.29 (m, 3H), 7.31-7.34 (m, 2H), 7.38-7.41 (m, 2H), 7.48-7.54 (m, 1H), 8.13 (d,  $J = 7.76$  Hz, 1H);  $^{13}\text{C}$  NMR (100 MHz,  $\text{CDCl}_3$ )  $\delta$  14.0, 22.7, 28.5, 32.1, 55.2, 96.1, 113.5, 122.6, 123.5, 123.8, 126.7, 127.0, 127.4, 127.8, 128.1, 128.7, 130.3, 131.2, 132.8, 133.5, 136.4, 139.2, 155.4, 158.5. IR ( $\text{cm}^{-1}$ ): 3052, 2955, 2929, 2858, 1603, 1512, 1475, 1460, 1337, 1245, 1168, 1034;  $m/z$  (ESI): 407 ( $\text{M}^+\text{+H}$ ); HRMS calcd. for  $\text{C}_{28}\text{H}_{27}\text{N}_2\text{O}$  ( $\text{M}+\text{H}$ ) 407.2123, found 407.2141.

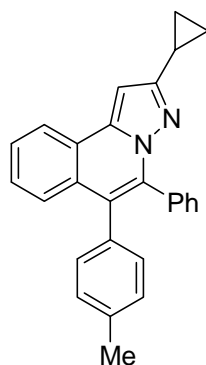

**7d.** 2-cyclopropyl-5-phenyl-6-p-tolylpyrazolo[5,1-a]isoquinoline

Yield: 86%;  $^1\text{H}$  NMR (400 MHz,  $\text{CDCl}_3$ ): 0.80-0.84 (m, 2H), 0.96-1.04 (m, 2H), 2.10-2.14 (m, 1H), 2.31 (s, 3H), 6.65 (s, 1H), 7.02-7.07 (m, 4H), 7.25-7.28 (m, 3H), 7.31-7.36 (m, 2H), 7.37-7.40 (m, 2H), 7.48-7.51 (m, 1H), 8.07 (d,  $J = 8.28$  Hz, 1H);  $^{13}\text{C}$  NMR (100 MHz,  $\text{CDCl}_3$ )  $\delta$  9.28, 9.96, 21.3, 92.6, 122.8, 123.4, 123.7, 126.7, 127.0, 127.5, 127.7, 128.1, 128.7, 130.2, 131.3, 131.6, 133.3, 133.4, 136.1, 136.6, 139.4, 157.4. IR ( $\text{cm}^{-1}$ ): 3042, 2955, 2923, 2852, 1536, 1513, 1493, 1449, 1398, 1342, 1301, 1178, 1075;  $m/z$  (ESI): 375 ( $\text{M}^+\text{+H}$ ); HRMS calcd. for  $\text{C}_{27}\text{H}_{23}\text{N}_2$  ( $\text{M}+\text{H}$ )

375.1861, found 375.1878.

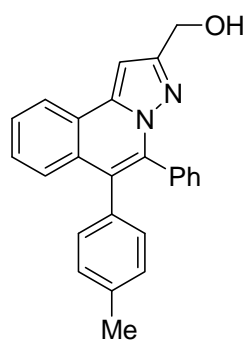

**7e.** (5-phenyl-6-p-tolylpyrazolo[5,1-a]isoquinolin-2-yl)methanol

Yield: 50%;  $^1\text{H}$  NMR (400 MHz,  $\text{CDCl}_3$ ): 2.32 (s, 3H), 4.84 (s, 2H), 7.04-7.09 (m, 5H), 7.27-7.33 (m, 5H), 7.41-7.43 (m, 2H), 7.54-7.57 (m, 1H), 8.15 (d,  $J = 8.24$  Hz, 1H);  $^{13}\text{C}$  NMR (100 MHz,  $\text{CDCl}_3$ )  $\delta$  21.3, 59.6, 95.9, 123.6, 123.9, 124.0, 126.9, 127.4, 127.9, 128.3, 128.8, 130.2, 131.2, 131.5, 133.1, 133.2, 136.2, 136.8, 139.6, 153.7. IR ( $\text{cm}^{-1}$ ): 3354, 3052, 2920, 2847, 1593, 1536, 1513, 1490, 1454, 1388, 1332, 1033;  $m/z$  (ESI): 365 ( $\text{M}^+\text{+H}$ ); HRMS calcd for  $\text{C}_{25}\text{H}_{21}\text{N}_2\text{O}$  ( $\text{M}+\text{H}$ ) 365.1654, found 365.1665.

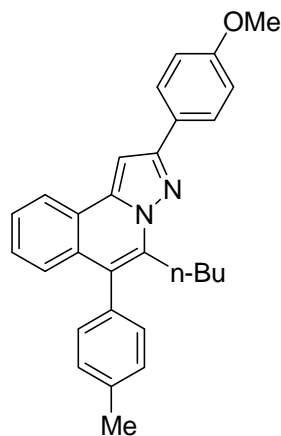

**7f.** 5-butyl-2-(4-methoxyphenyl)-6-p-tolylpyrazolo[5,1-a]isoquinoline

Yield: 88%;  $^1\text{H}$  NMR (400 MHz,  $\text{CDCl}_3$ ): 0.86 (t,  $J = 7.32$  Hz, 3H), 1.31-1.38 (m, 2H), 1.74-1.79 (m, 2H), 2.48 (s, 3H), 3.03 (t,  $J = 7.80$  Hz, 2H), 3.87 (s, 3H), 6.98-7.03 (m, 2H), 7.18-7.25 (m, 4H), 7.31-7.38 (m, 3H), 7.45-7.49 (m, 1H), 7.97-8.02 (m, 2H), 8.13 (d,  $J = 7.80$  Hz, 1H);  $^{13}\text{C}$  NMR (100 MHz,  $\text{CDCl}_3$ )  $\delta$  13.9, 21.4, 22.9, 28.9, 30.3, 55.4, 93.9, 114.2, 121.9, 123.2, 123.4, 126.3, 126.4, 126.7, 127.4, 127.7, 129.3, 130.4, 130.9, 134.0, 137.3, 137.8, 139.6, 151.8, 159.8; IR ( $\text{cm}^{-1}$ ): 2957, 2929, 2868, 1612,

1527, 1510, 1482, 1460, 1438, 1248, 1173, 1106, 1034;  $m/z$  (ESI): 421 ( $M^+H$ ); HRMS calcd. for  $C_{29}H_{29}N_2O$  ( $M+H$ ) 421.2280, found 421.2296.

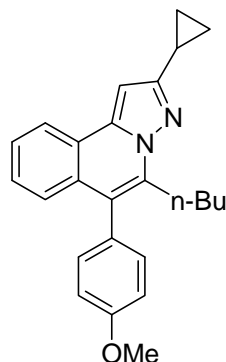

**7g.** 5-butyl-2-cyclopropyl-6-(4-methoxyphenyl)pyrazolo[5,1-a]isoquinoline

Yield: 86%;  $^1H$  NMR (400 MHz,  $CDCl_3$ ): 0.81 (t,  $J = 7.32$  Hz, 3H), 0.92-0.95 (m, 2H), 1.04-1.09 (m, 2H), 1.28-1.30 (m, 2H), 1.67-1.71 (m, 2H), 2.17-2.22 (m, 1H), 2.95 (t,  $J = 7.80$  Hz, 2H), 3.90 (s, 3H), 6.68 (s, 1H), 7.02-7.05 (m, 2H), 7.17-7.23 (m, 3H), 7.41-7.48 (m, 2H), 8.02 (d,  $J = 7.80$  Hz, 1H);  $^{13}C$  NMR (100 MHz,  $CDCl_3$ )  $\delta$  9.10, 9.86, 13.9, 22.8, 28.9, 30.2, 55.4, 93.3, 113.9, 114.2, 122.9, 123.3, 126.1, 126.2, 127.3, 127.8, 129.3, 130.6, 132.2, 137.9, 156.6, 159.0; IR ( $cm^{-1}$ ): 2956, 2927, 2852, 1607, 1510, 1456, 1342, 1276, 1245, 1173, 1106, 1040;  $m/z$  (ESI): 371 ( $M^+H$ ); HRMS calcd. for  $C_{25}H_{27}N_2O$  ( $M+H$ ) 371.2123, found 371.2135.

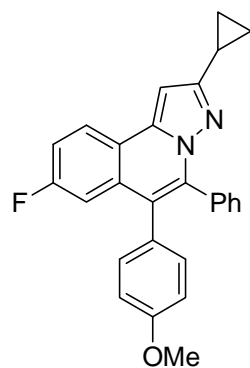

**7h.** 2-cyclopropyl-8-fluoro-6-(4-methoxyphenyl)-5-phenylpyrazolo[5,1-a]isoquinoline

Yield: 80%;  $^1H$  NMR (400 MHz,  $CDCl_3$ ): 0.79-0.82 (m, 2H), 0.98-1.02 (m, 2H), 2.09-2.14 (m, 1H), 3.79 (s, 3H), 6.60 (s, 1H), 6.77-6.82 (m, 2H), 7.02-7.07 (m, 3H), 7.21-7.35 (m, 6H), 8.04-8.07 (m, 1H);  $^{13}C$  NMR (100 MHz,  $CDCl_3$ )  $\delta$  9.29, 9.95, 55.2, 92.4, 111.8 (d,  $^2J_{CF} = 22.9$  Hz), 113.7, 115.7 (d,  $^2J_{CF} = 23.8$  Hz), 120.3, 121.8, 125.7, 127.8, 128.1, 128.3, 131.1, 132.4, 132.7, 133.2, 137.3, 139.1, 157.8, 158.7, 161.9 (d,  $^1J_{CF} = 245.0$  Hz); IR ( $cm^{-1}$ ): 2924, 2852, 1608, 1512, 1500, 1449, 1403, 1342, 1285,

1246, 1175, 1024;  $m/z$  (ESI): 409 ( $M^+H$ ); HRMS calcd. for  $C_{27}H_{22}FN_2O$  ( $M+H$ ) 409.1716, found 409.1710.

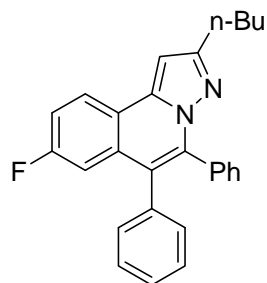

**7i.** 2-butyl-8-fluoro-5,6-diphenylpyrazolo[5,1-a]isoquinoline

Yield: 94%;  $^1H$  NMR (400 MHz,  $CDCl_3$ ): 0.94 (t,  $J = 7.32$  Hz, 3H), 1.37-1.45 (m, 2H), 1.67-1.75 (m, 2H), 2.79 (t,  $J = 7.80$  Hz, 2H), 6.86 (s, 1H), 6.97-7.08 (m, 1H), 7.15-7.20 (m, 2H), 7.24-7.31 (m, 9H), 8.09-8.12 (m, 1H);  $^{13}C$  NMR (100 MHz,  $CDCl_3$ )  $\delta$  14.0, 22.7, 28.5, 32.0, 95.9, 111.7 (d,  $^2J_{CF} = 22.9$  Hz), 115.7 (d,  $^2J_{CF} = 23.8$  Hz), 120.5, 122.3, 125.7, 127.3, 127.8, 128.2, 128.4, 131.1, 131.7, 132.0, 133.0, 136.1, 137.3, 138.9, 155.9, 161.9 (d,  $^1J_{CF} = 245.0$  Hz); IR ( $cm^{-1}$ ): 3062, 2955, 2921, 2847, 1620, 1540, 1486, 1464, 1443, 1400, 1342, 1321, 1265, 1191;  $m/z$  (ESI): 395 ( $M^+H$ ); HRMS calcd. for  $C_{27}H_{24}FN_2$  ( $M+H$ ) 395.1924, found 395.1945.

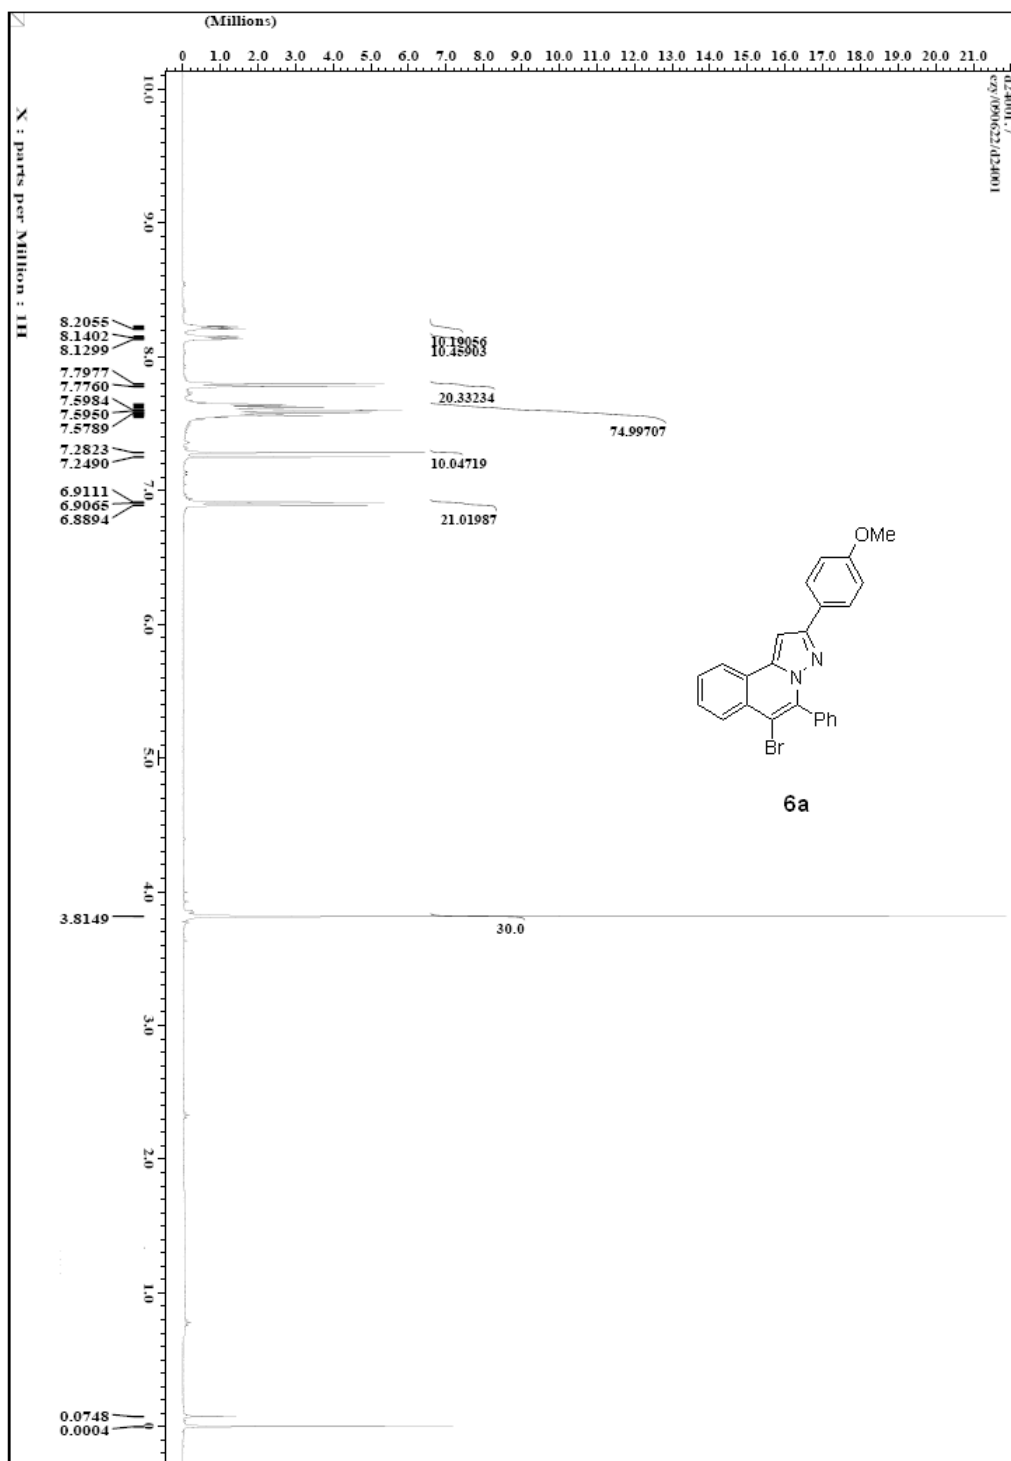

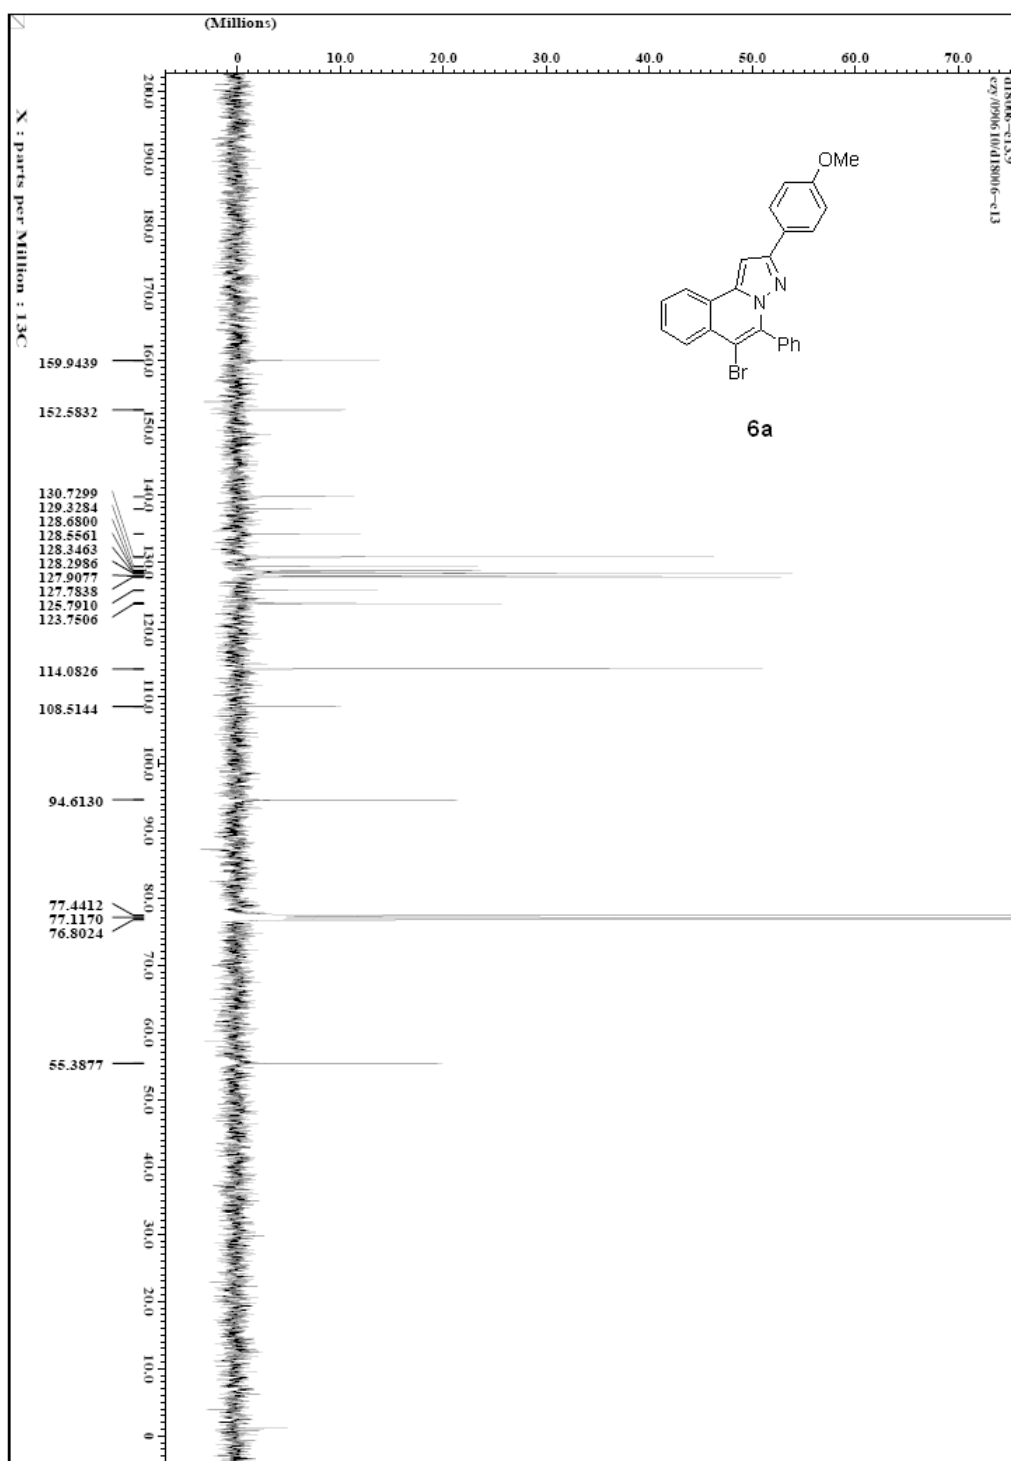

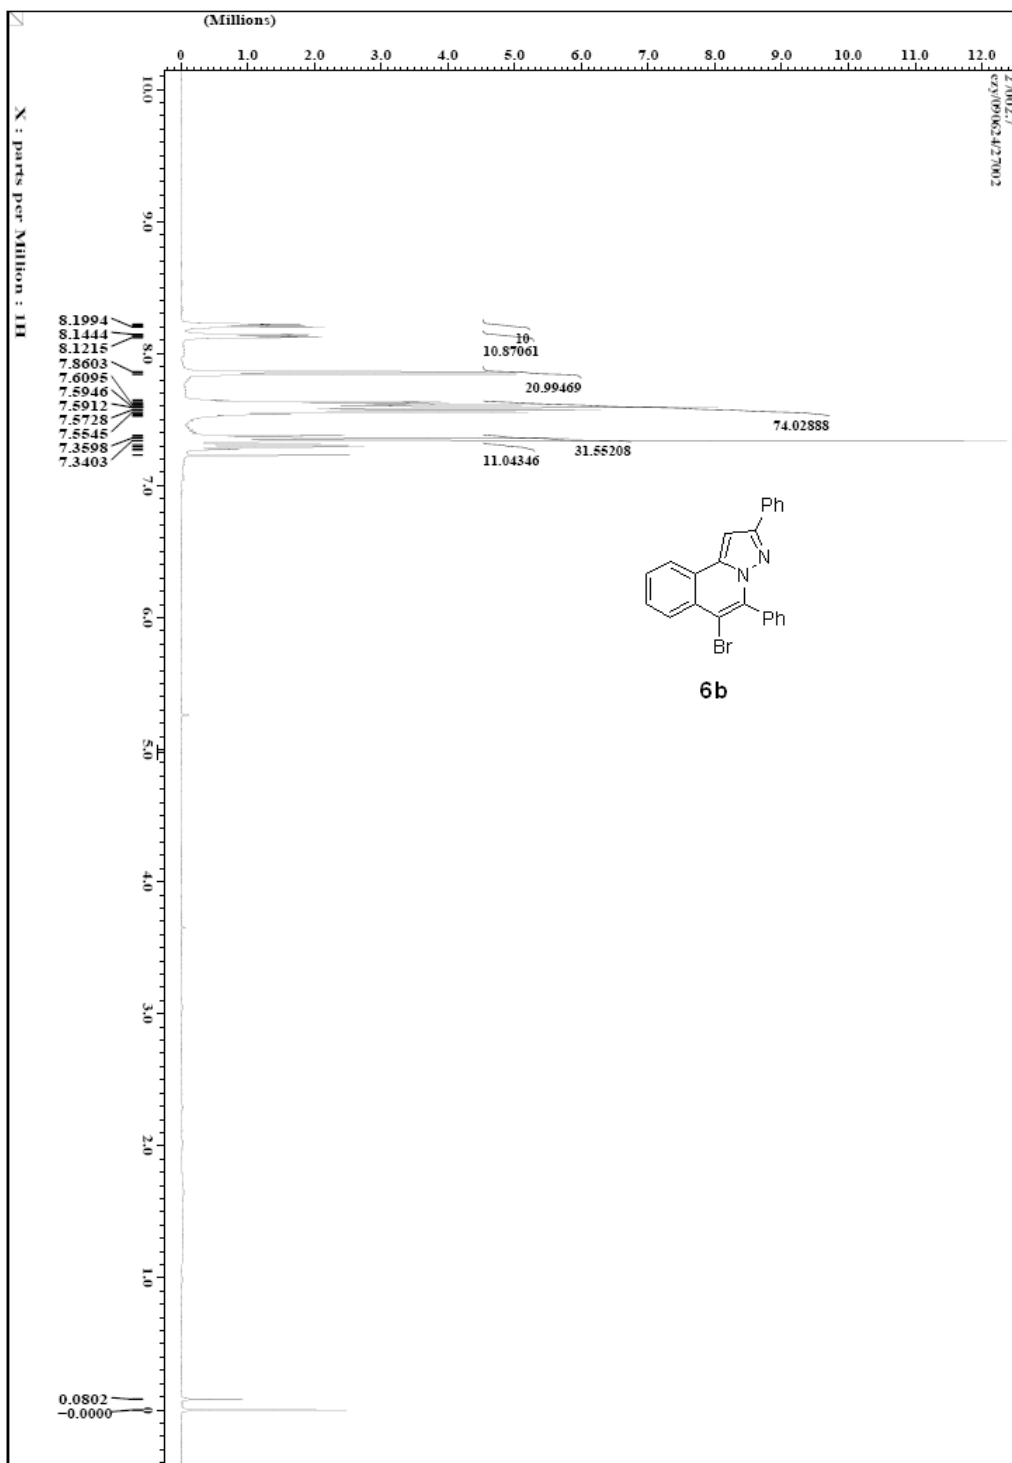



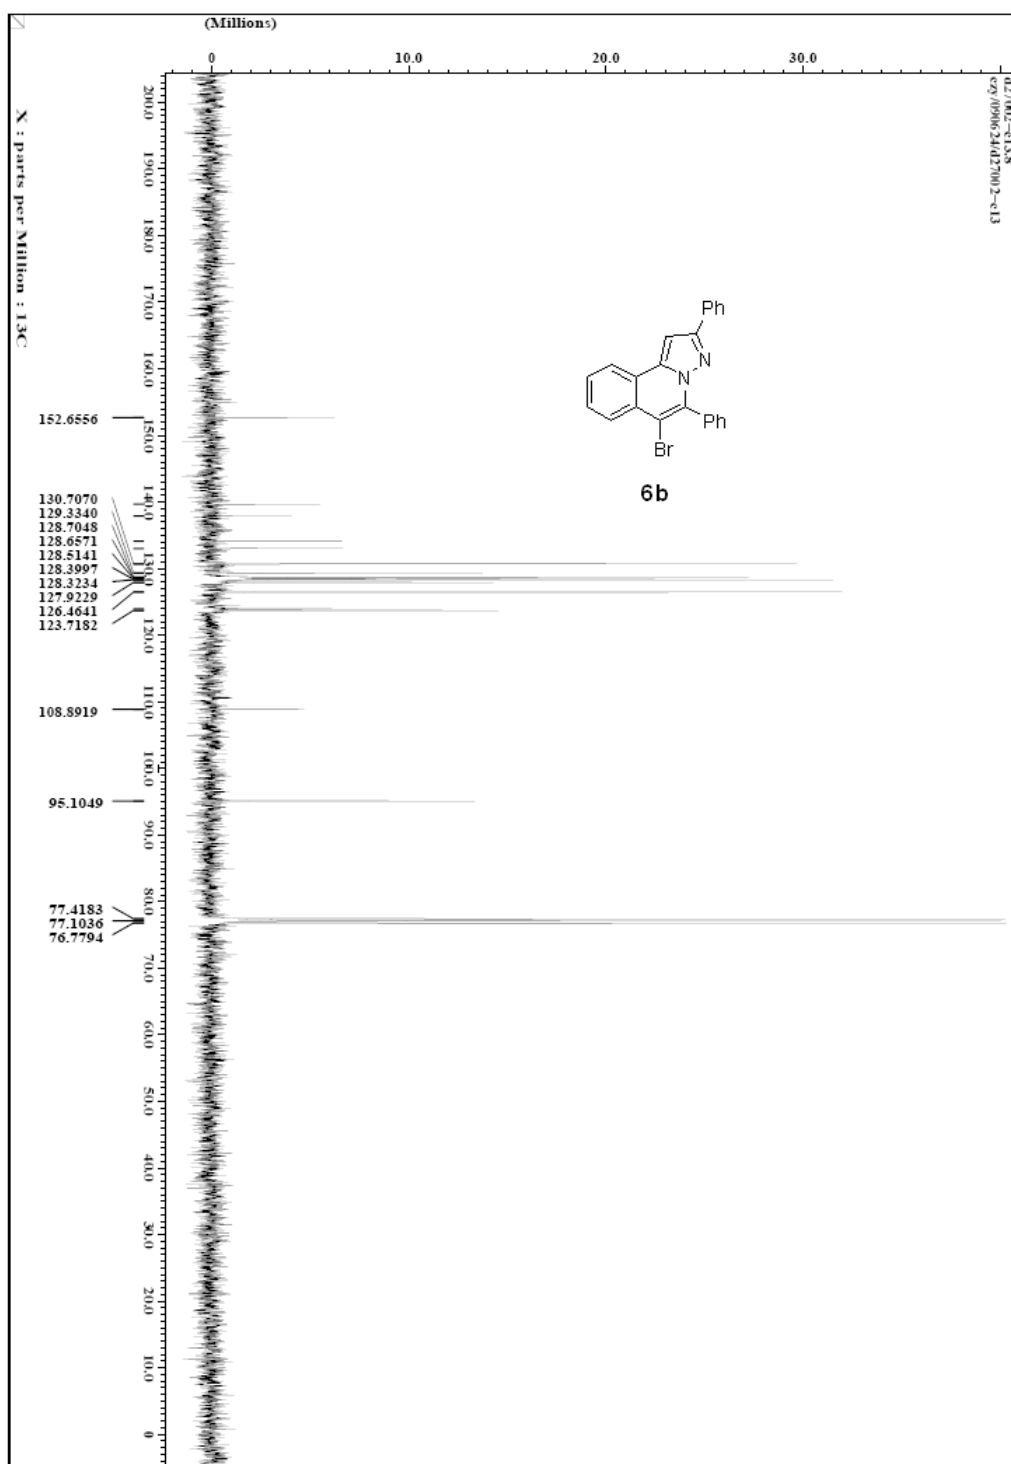

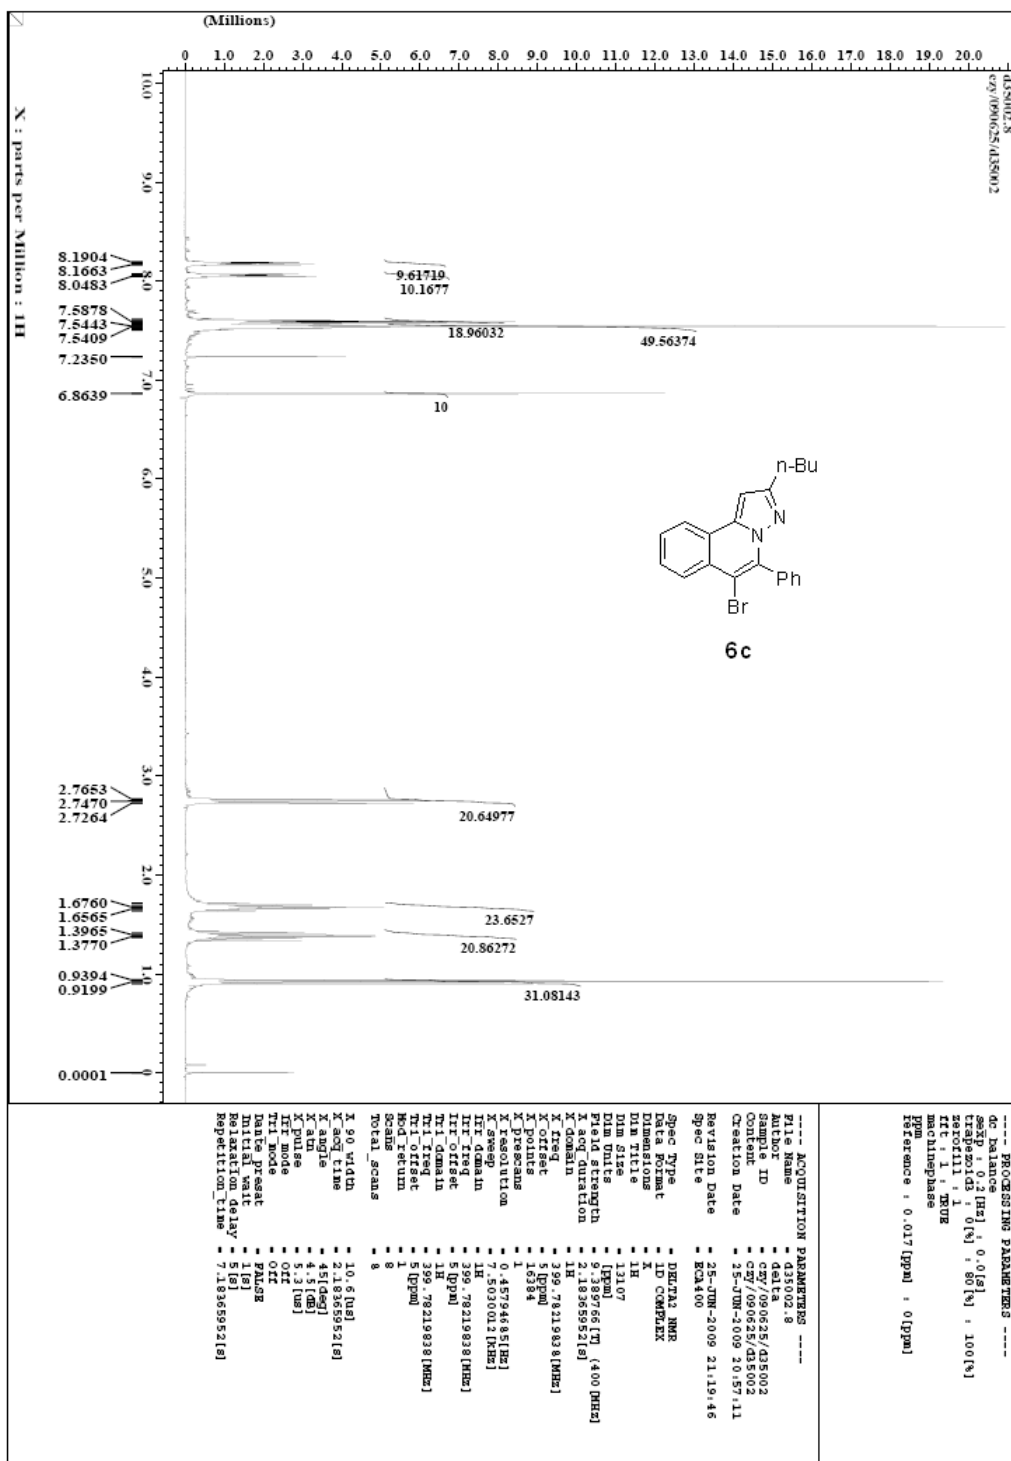

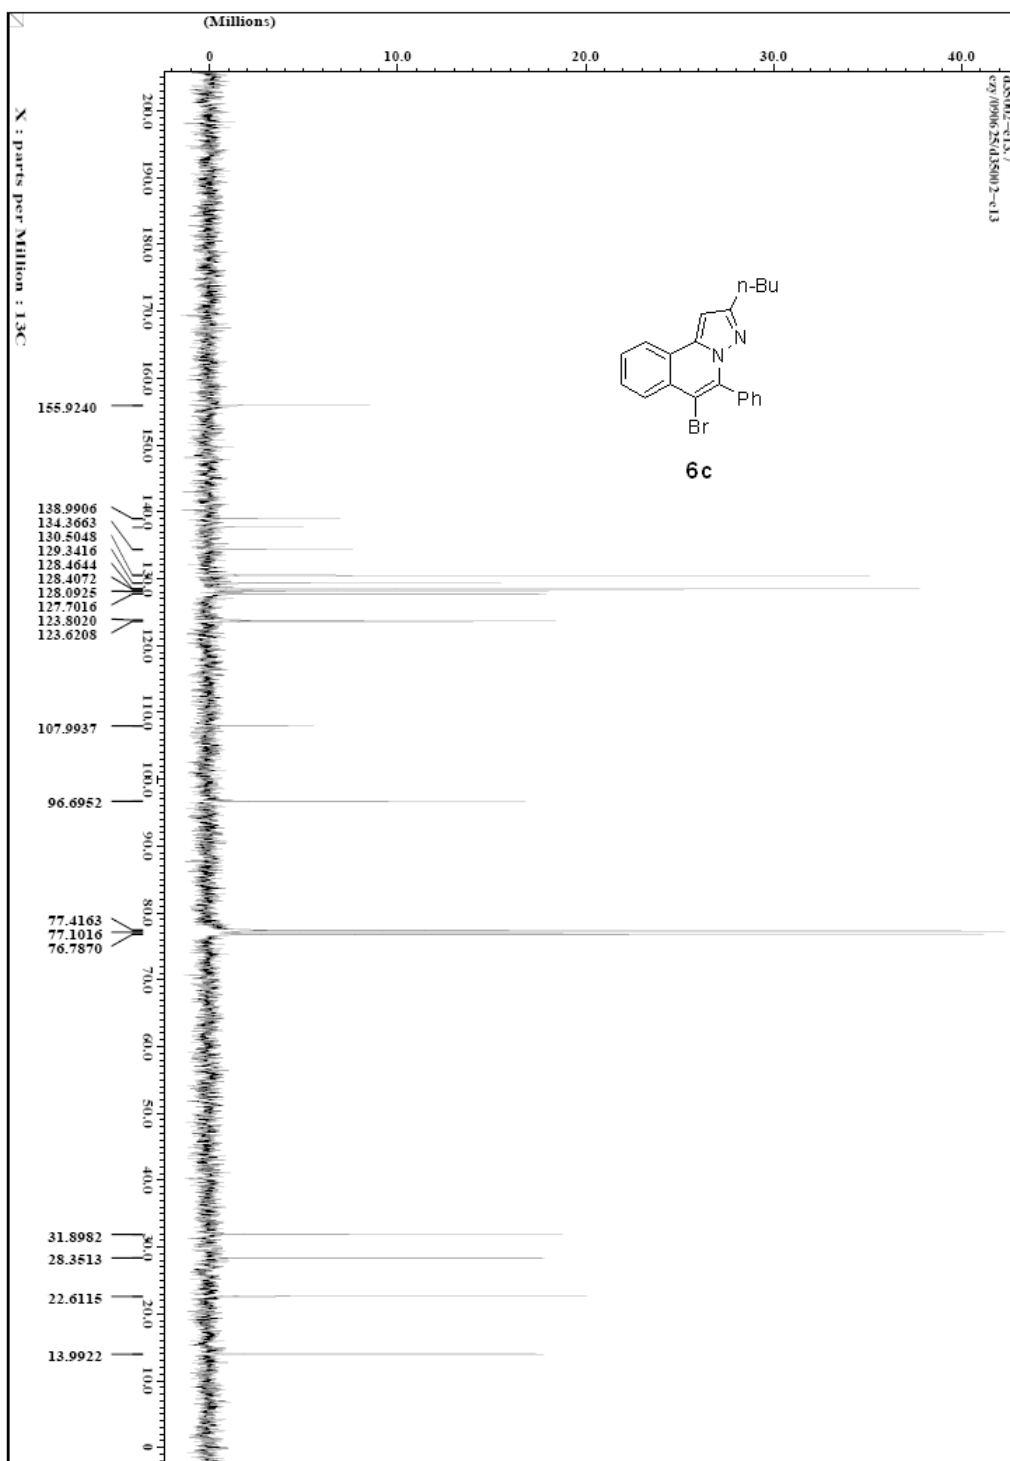

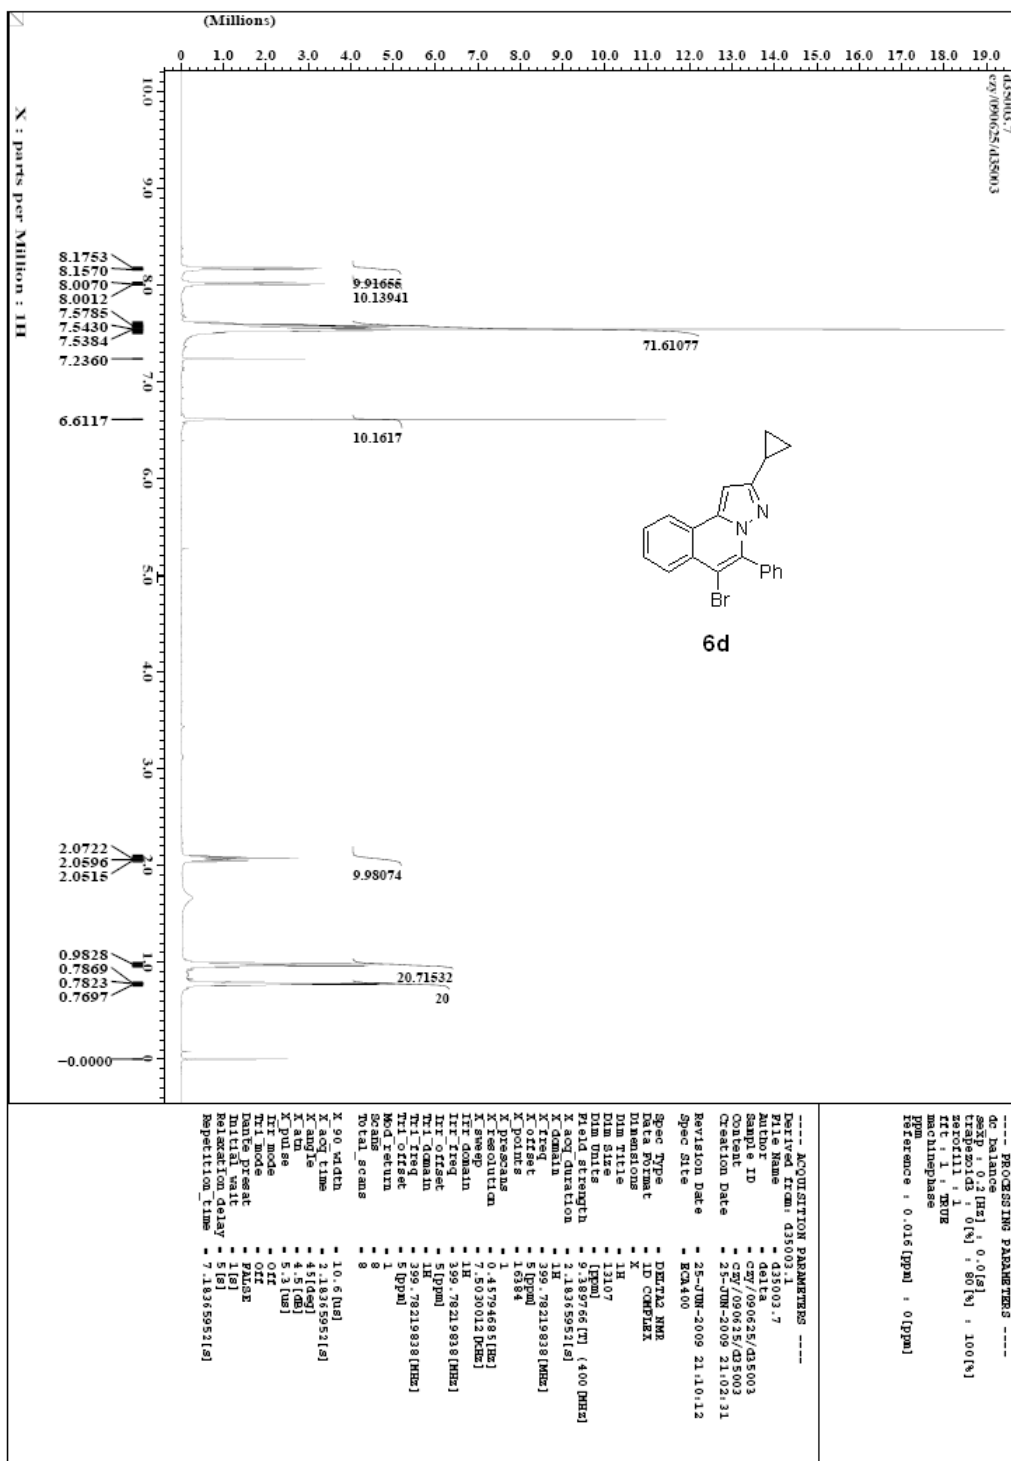

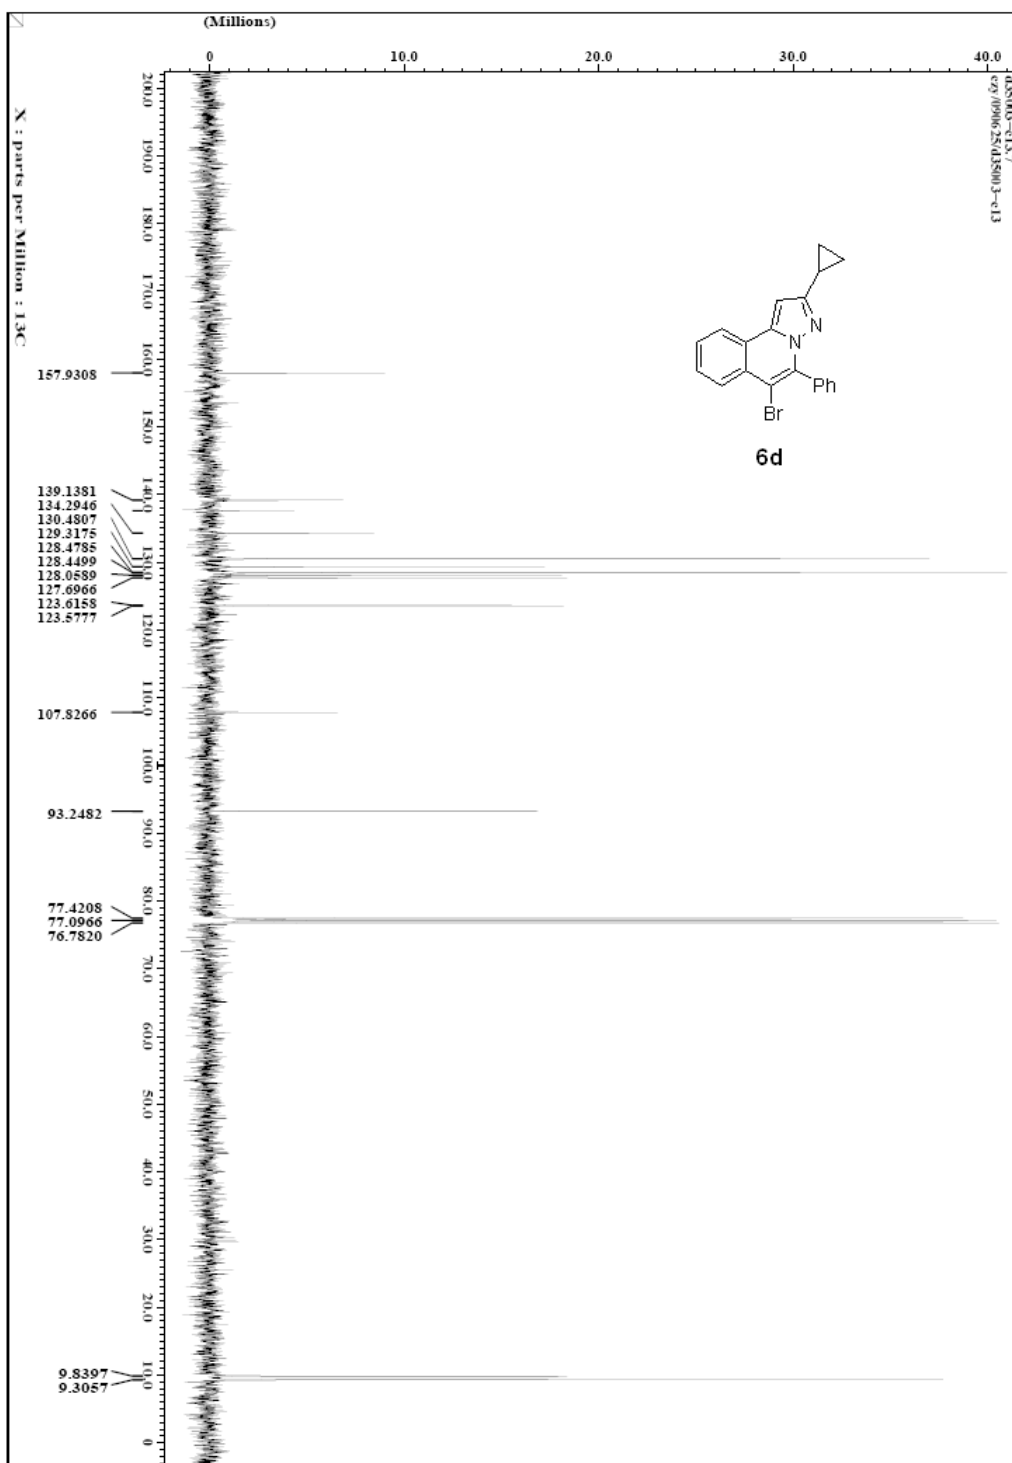



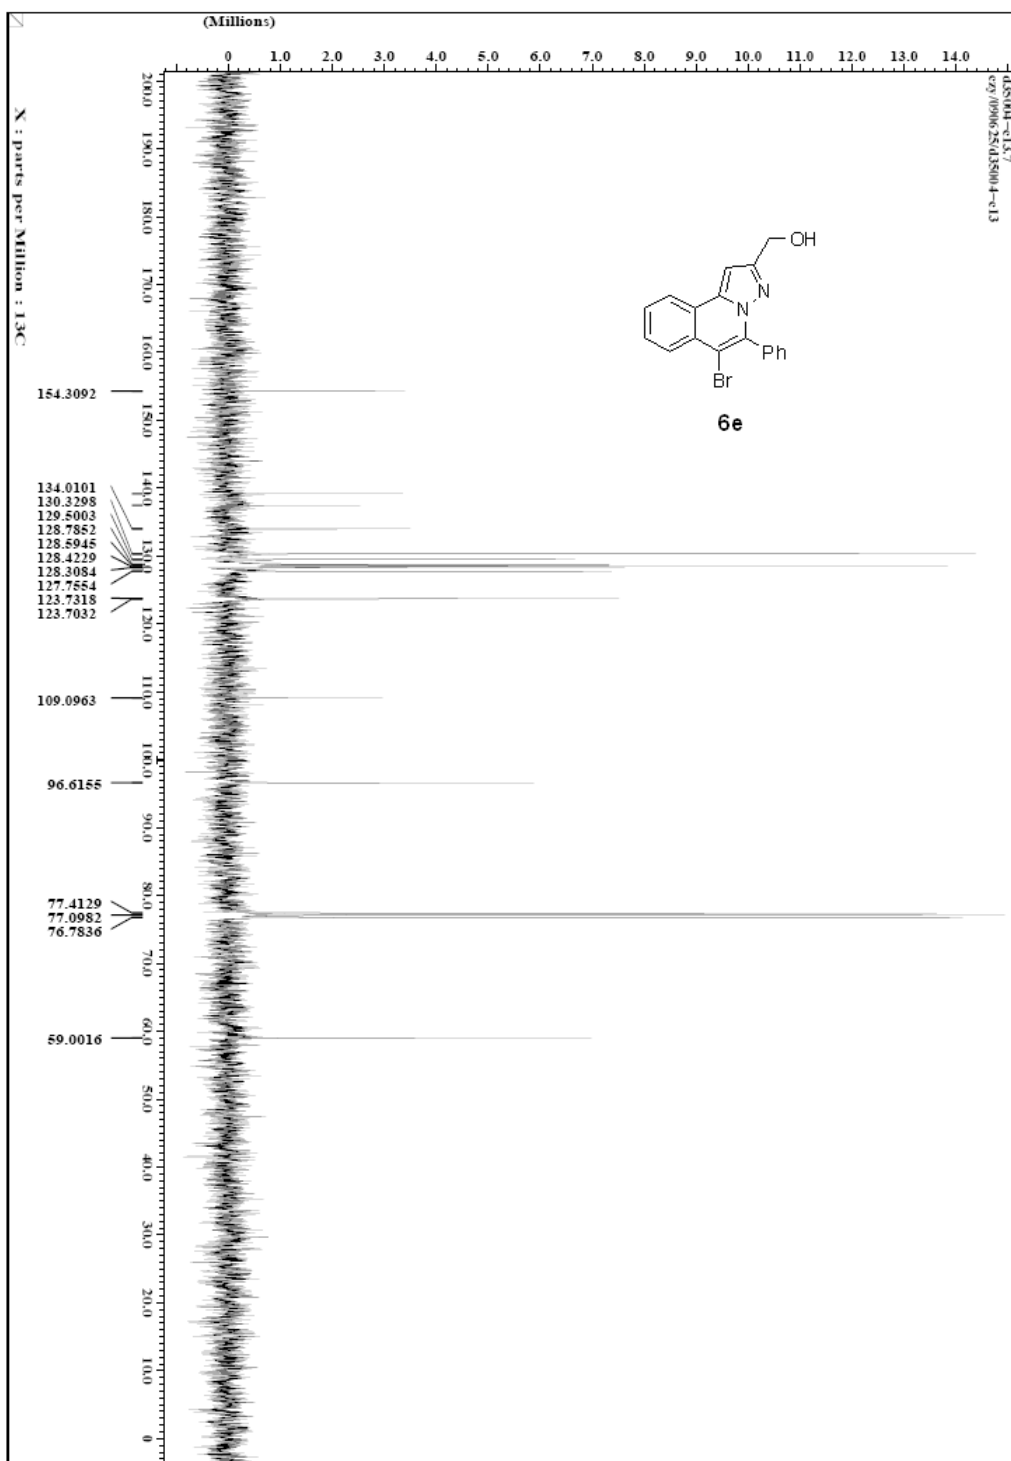

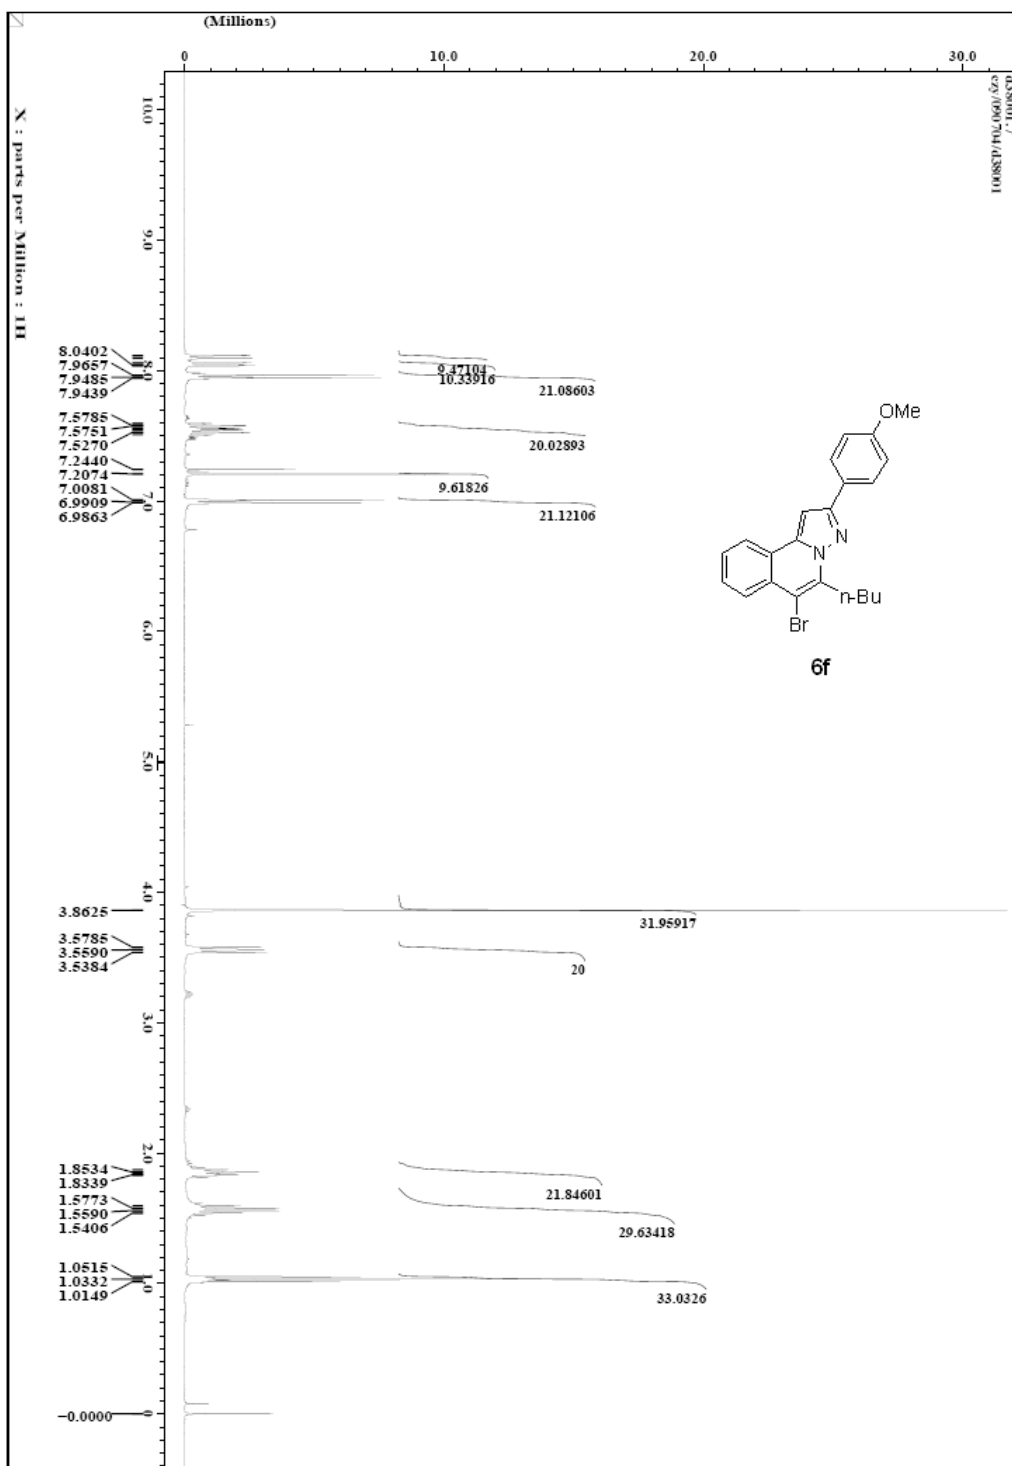



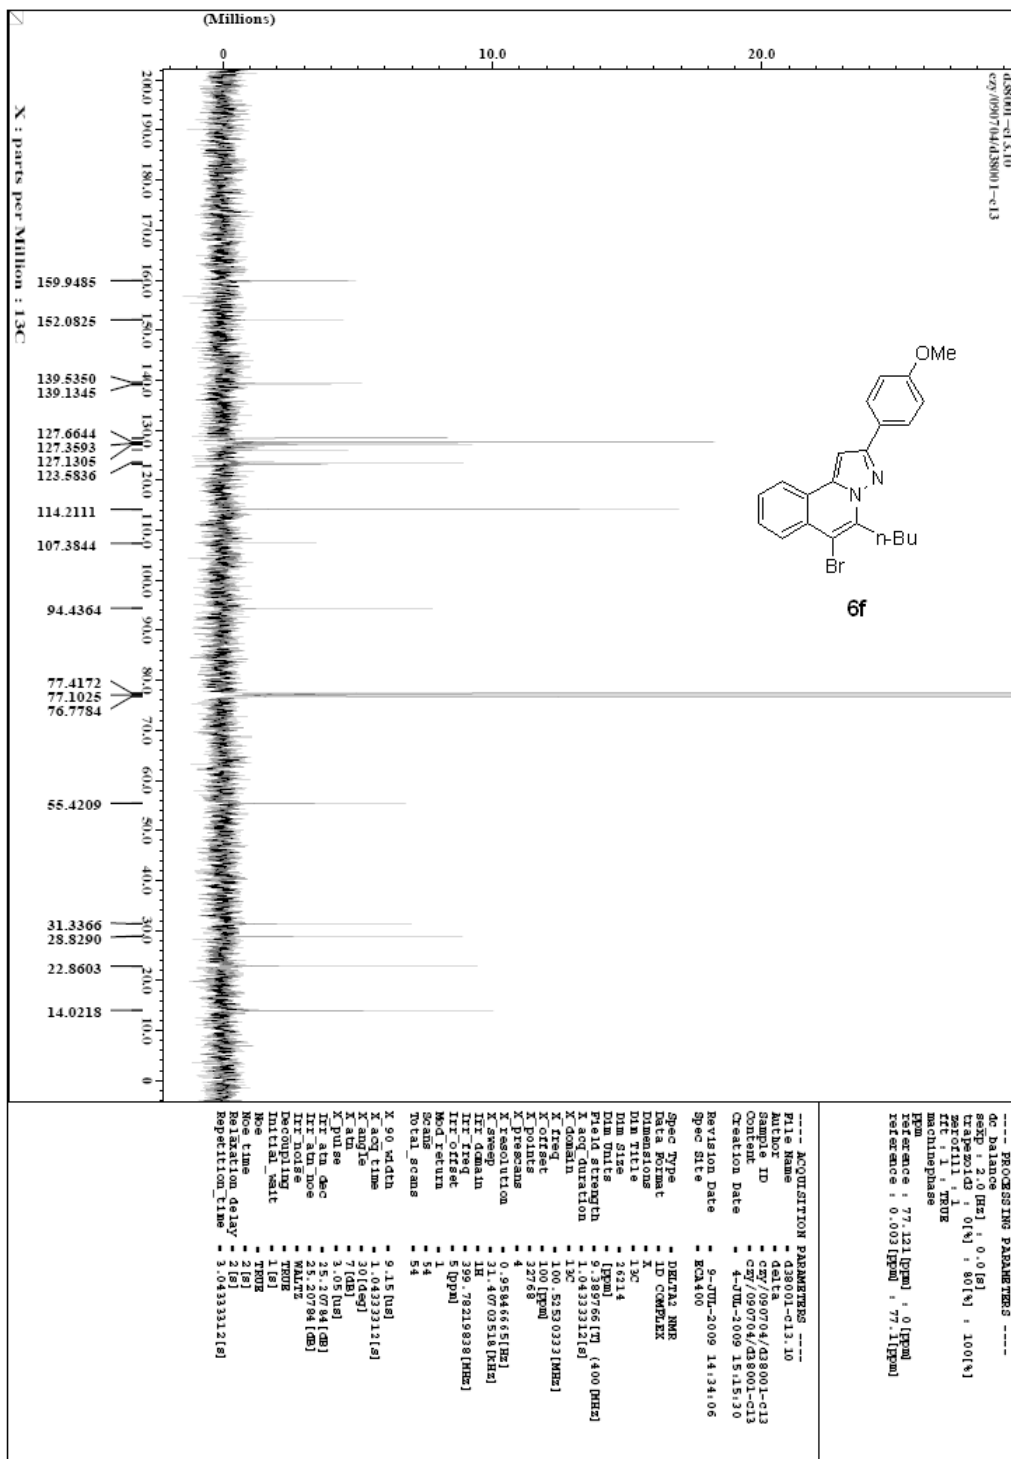

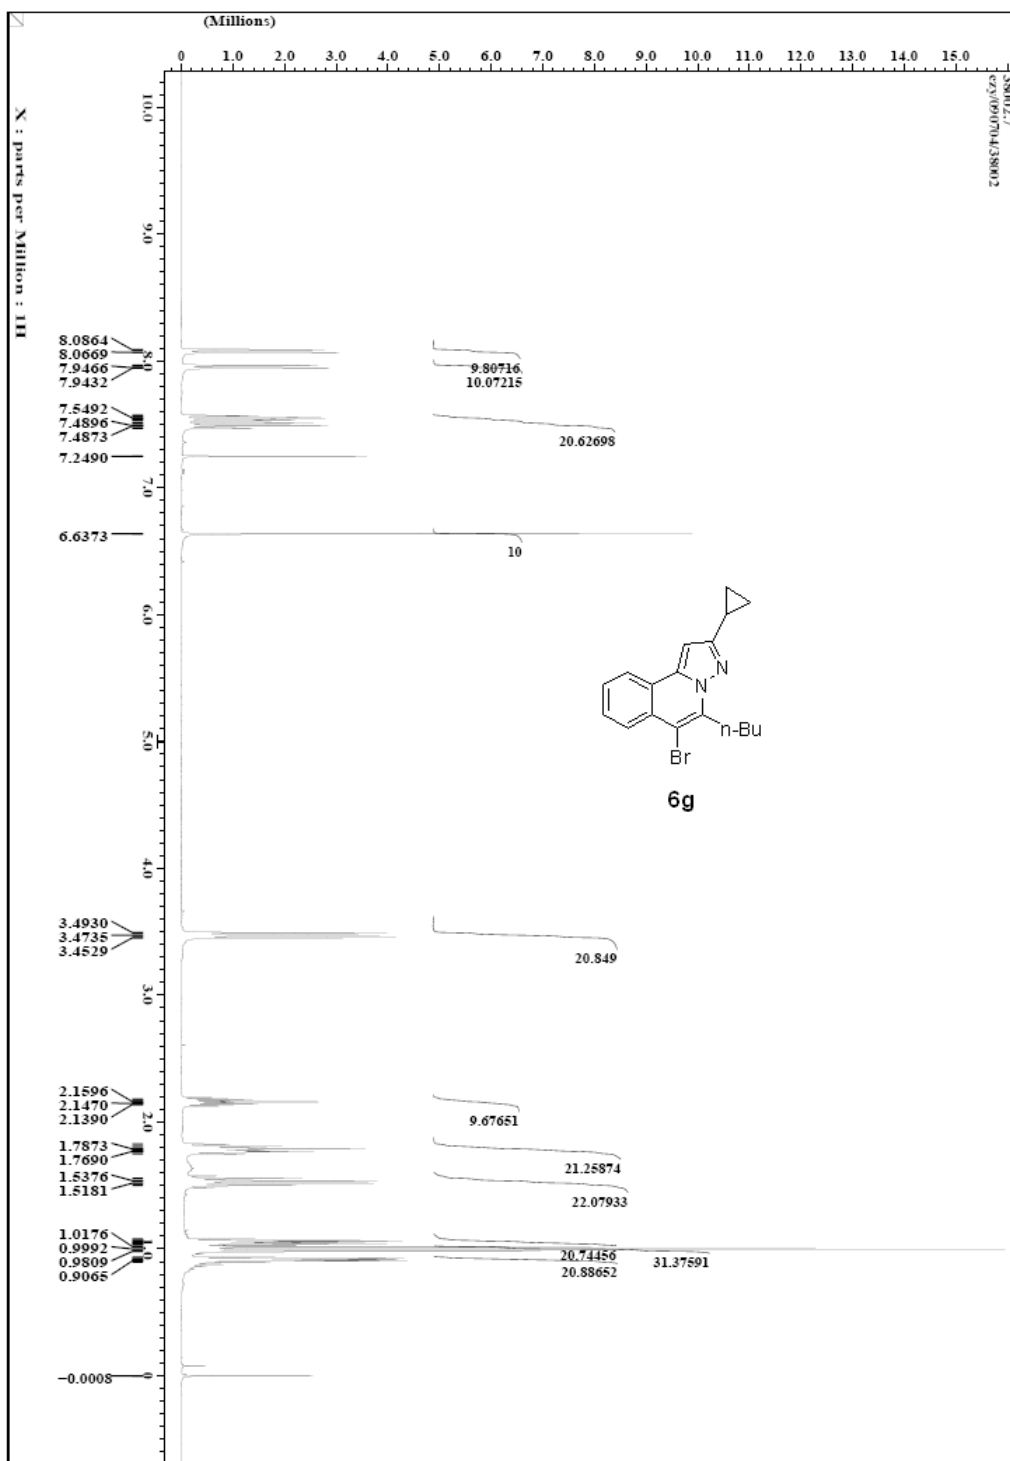

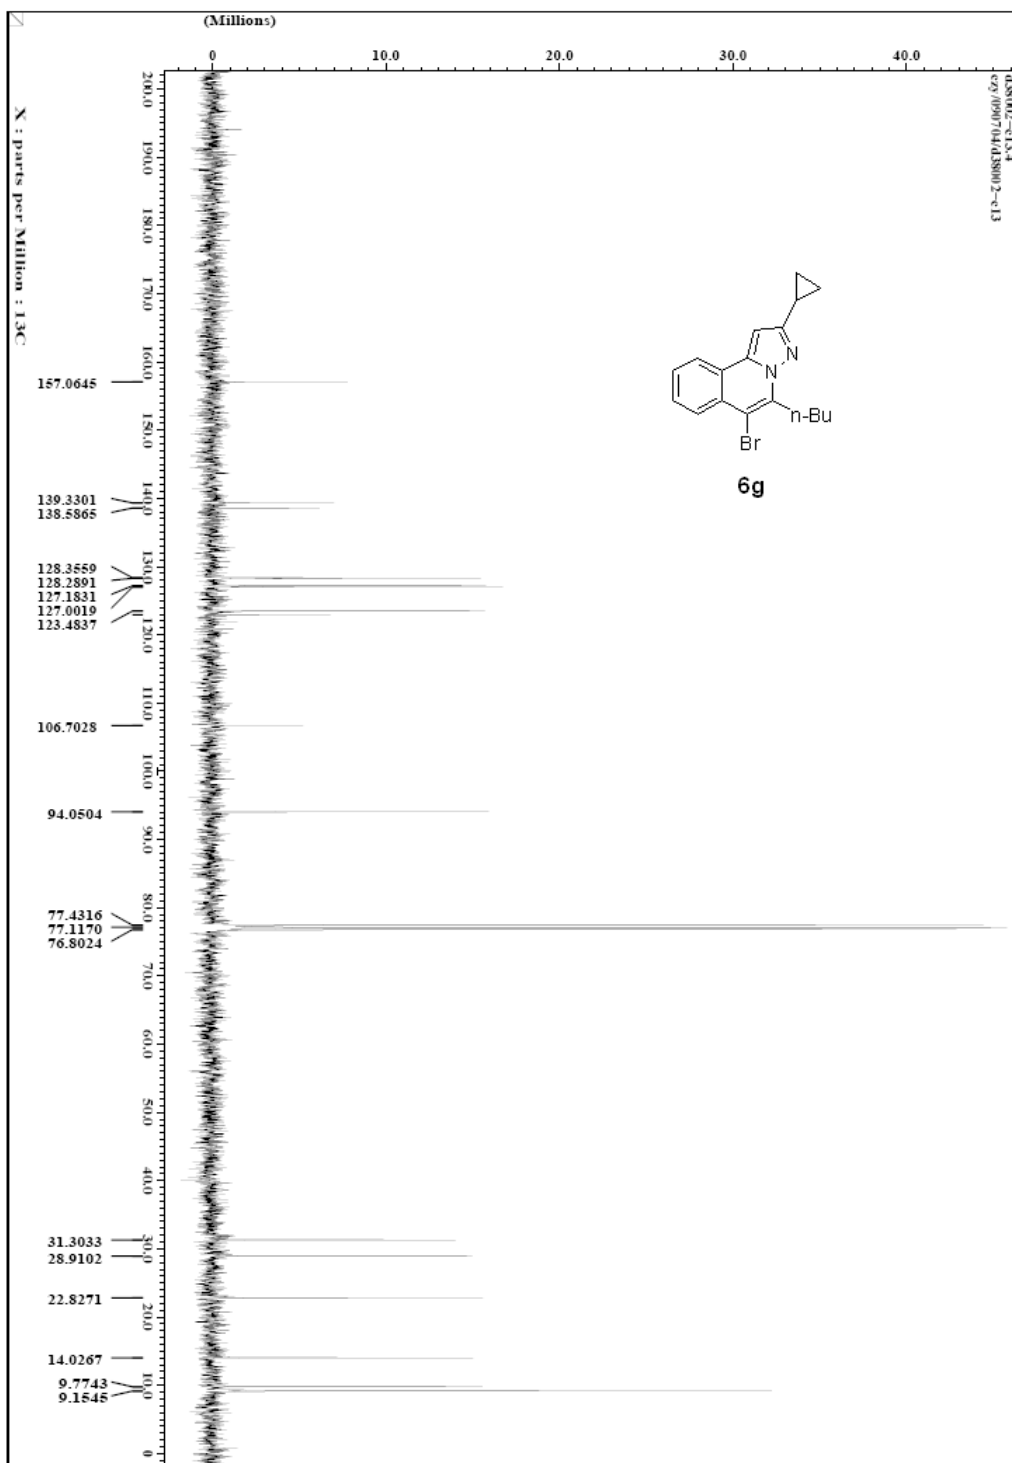

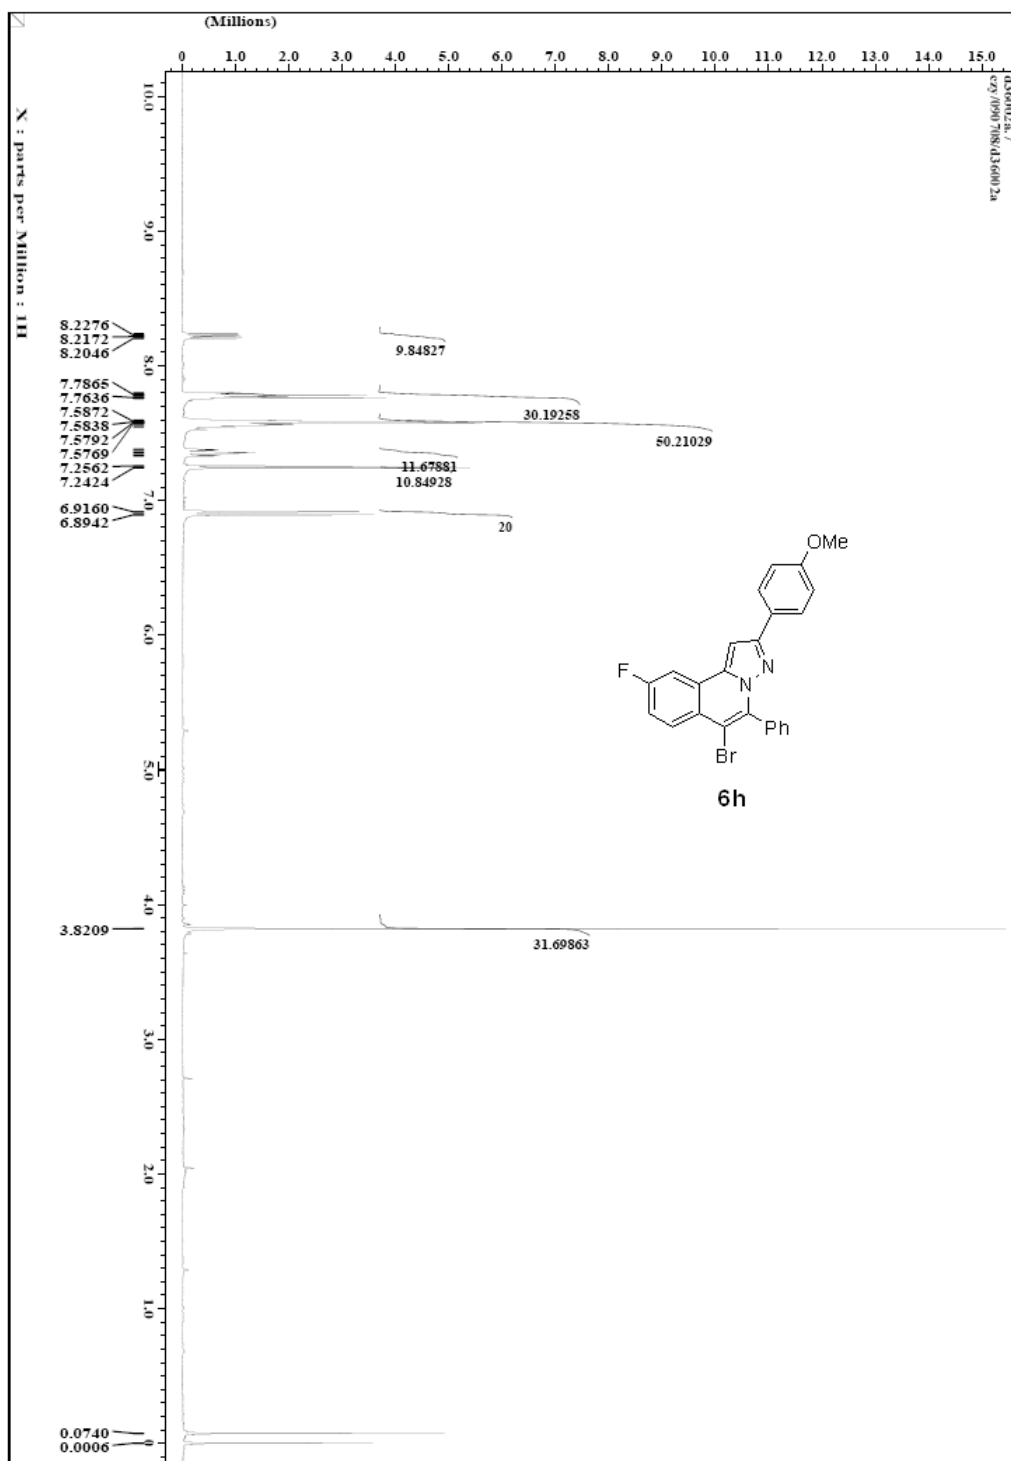

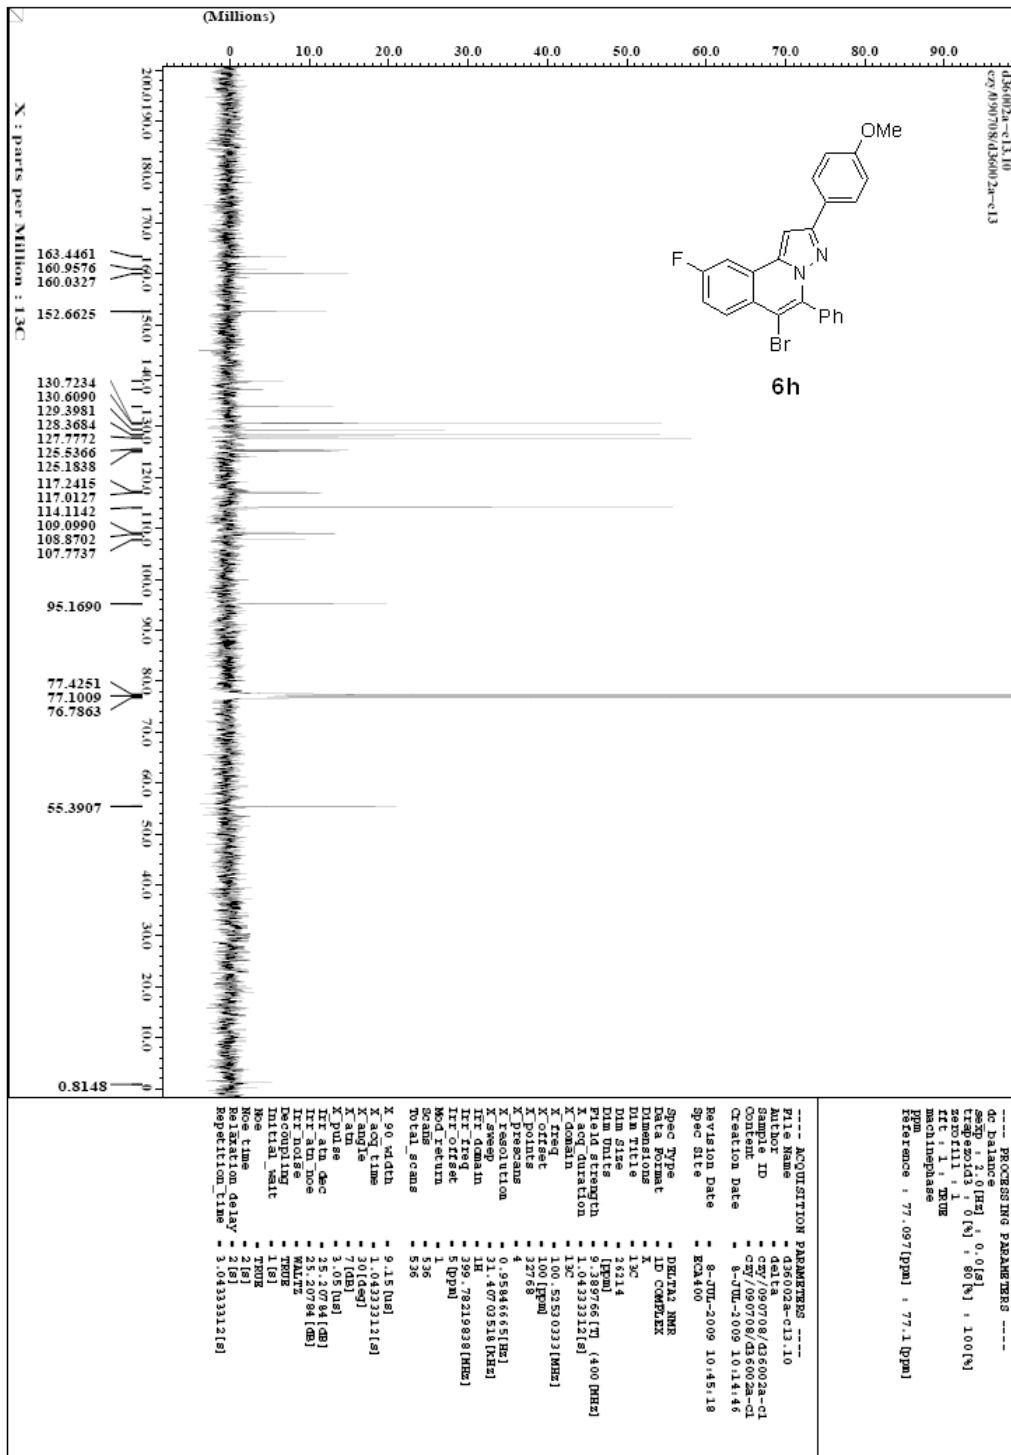

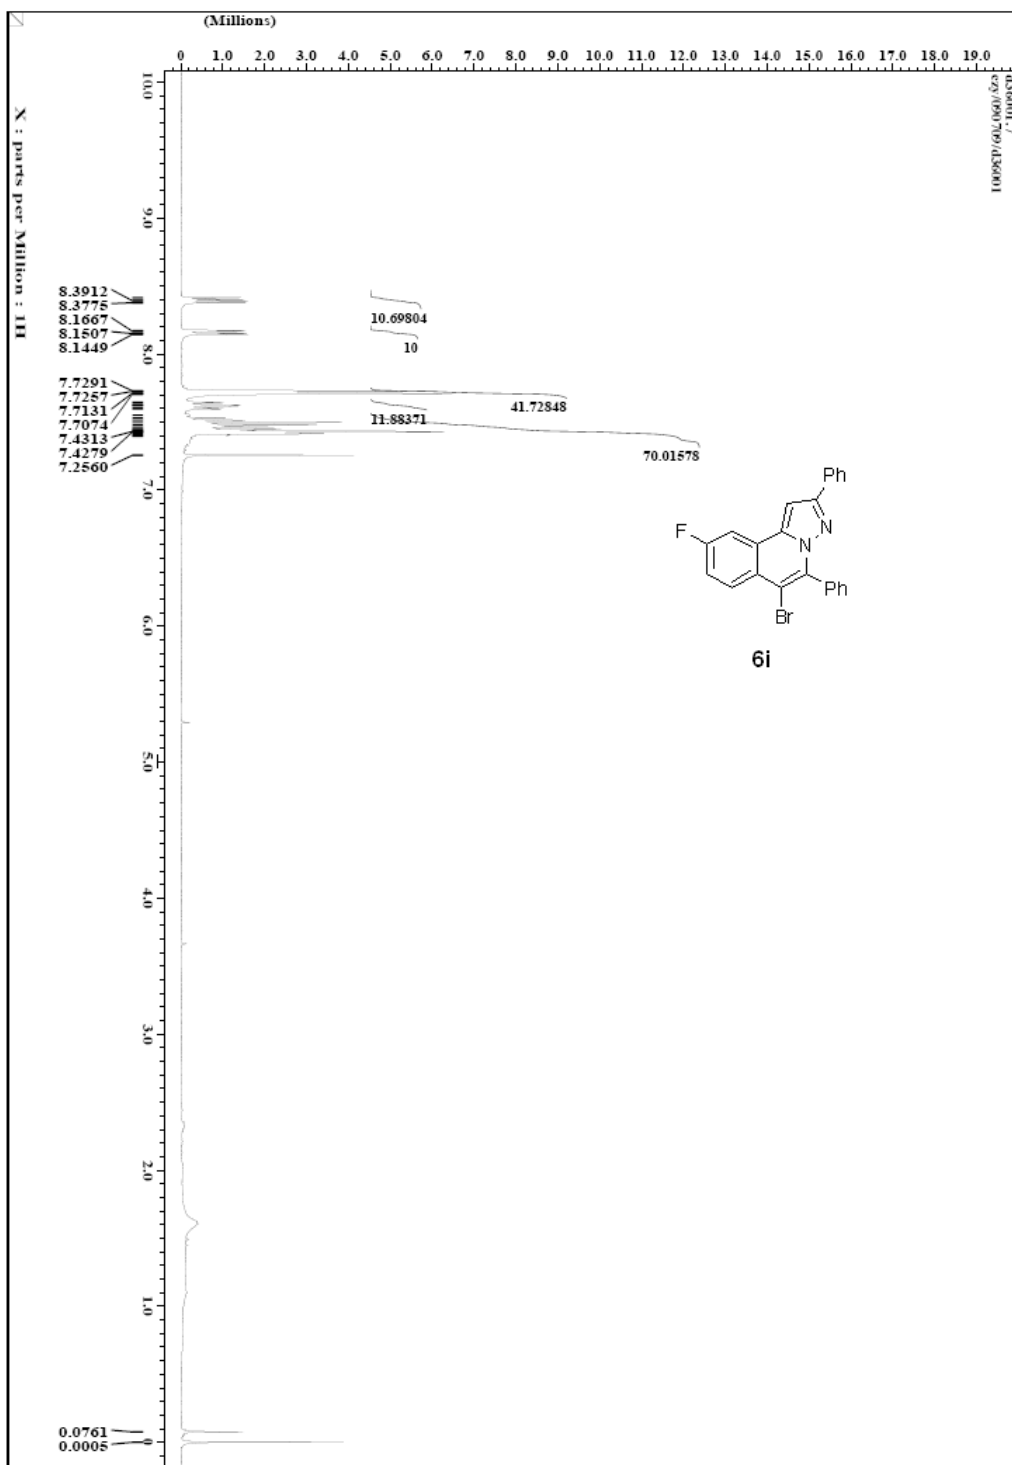

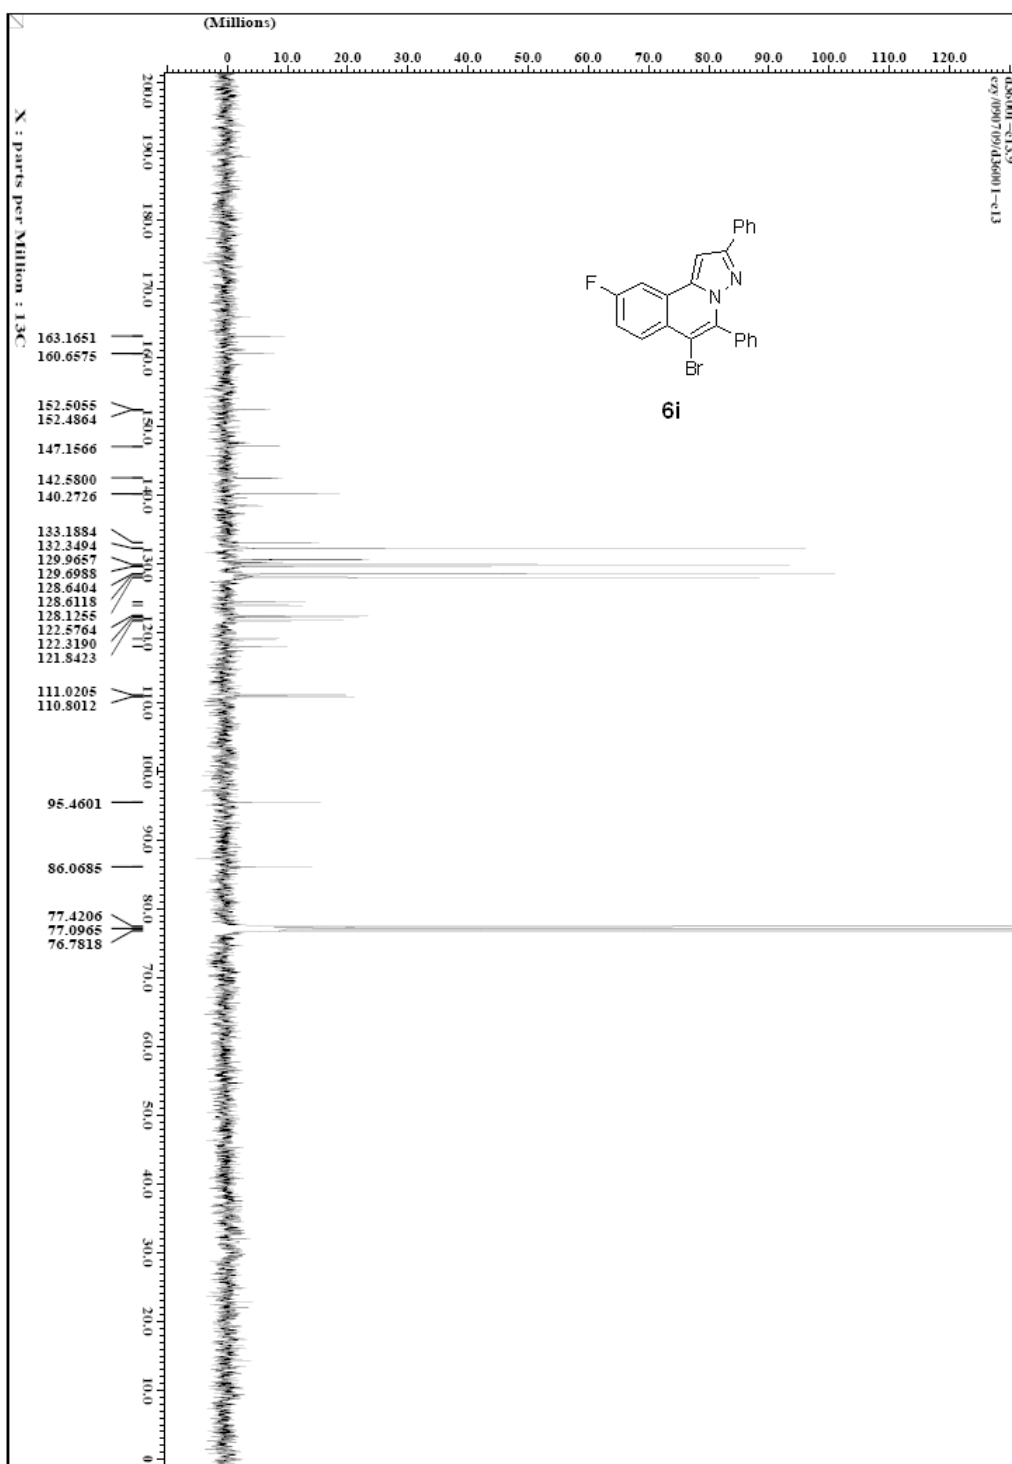

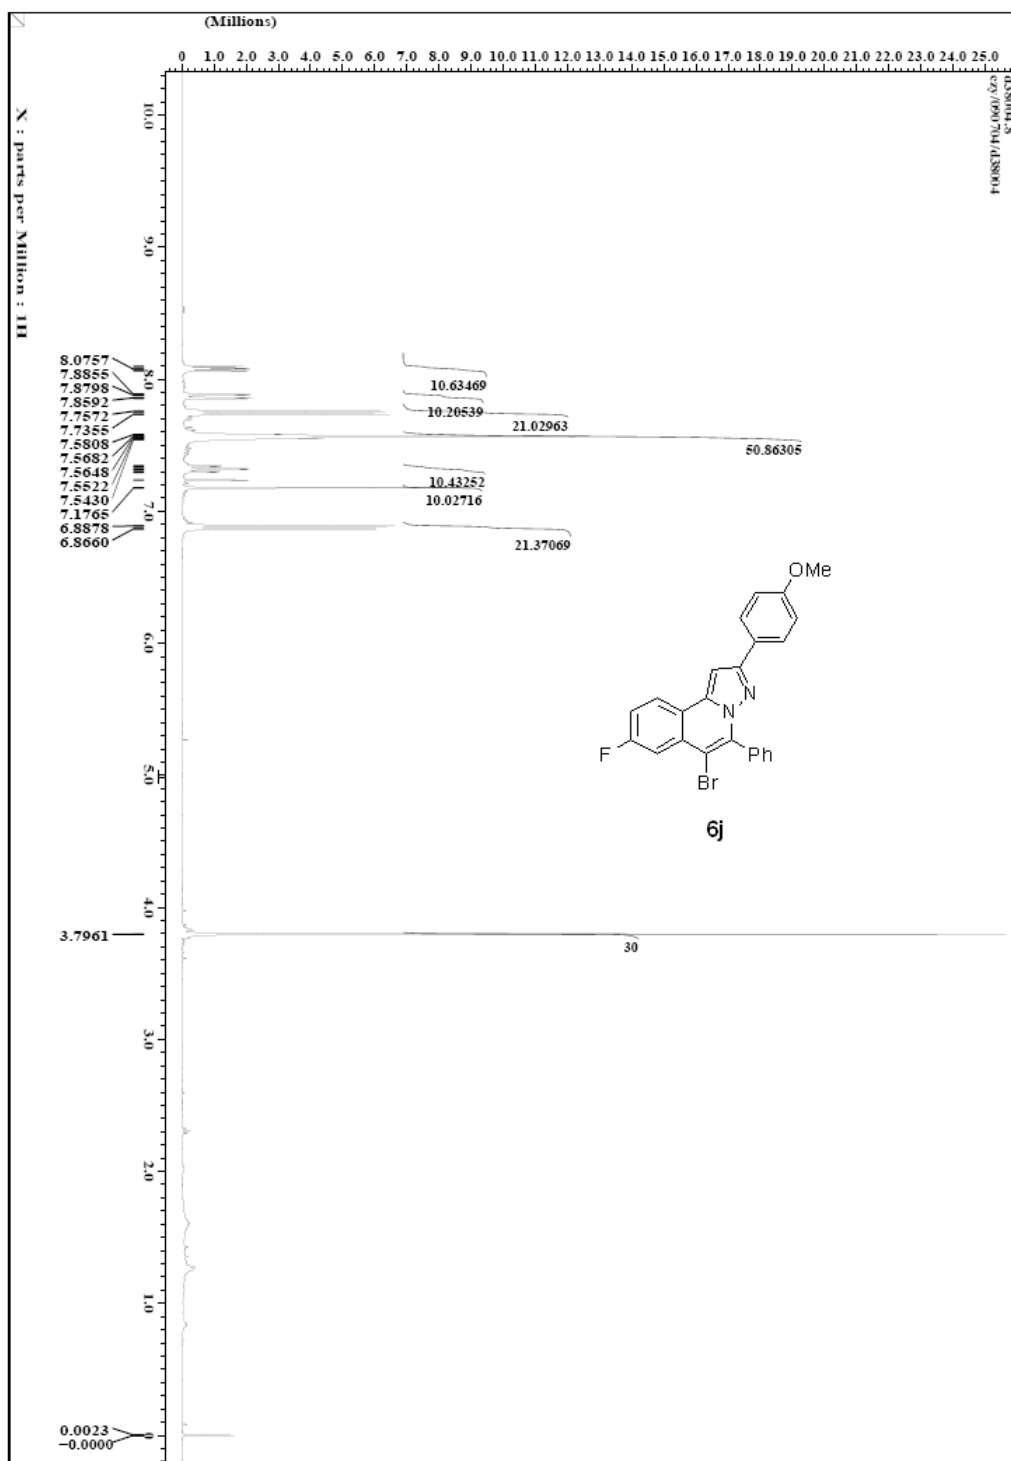



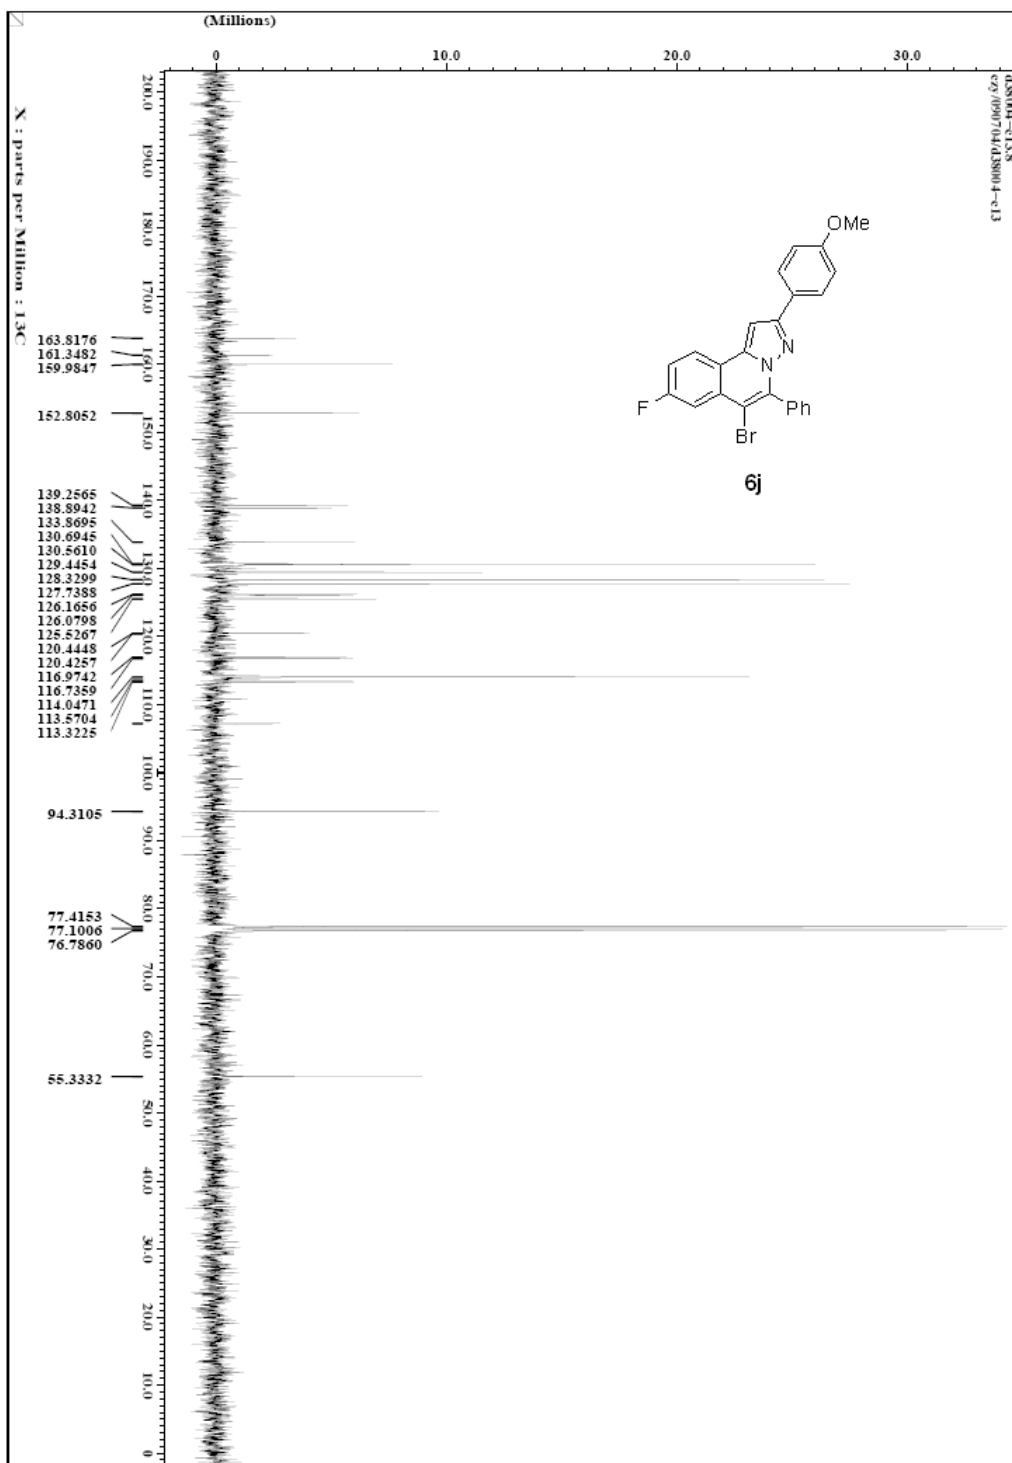

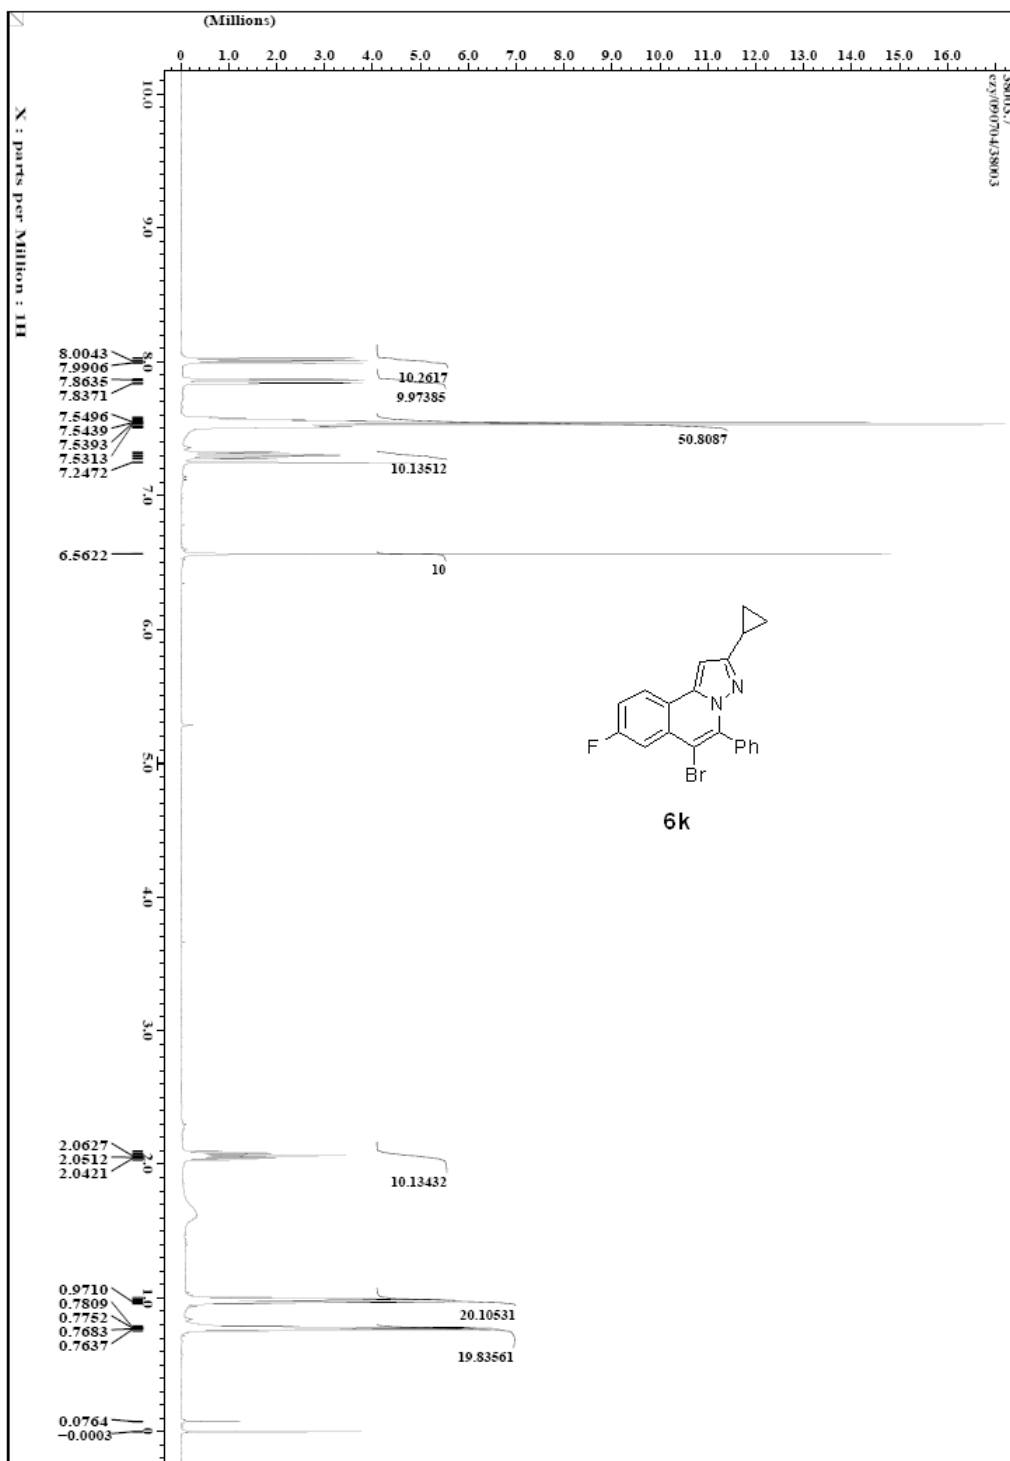

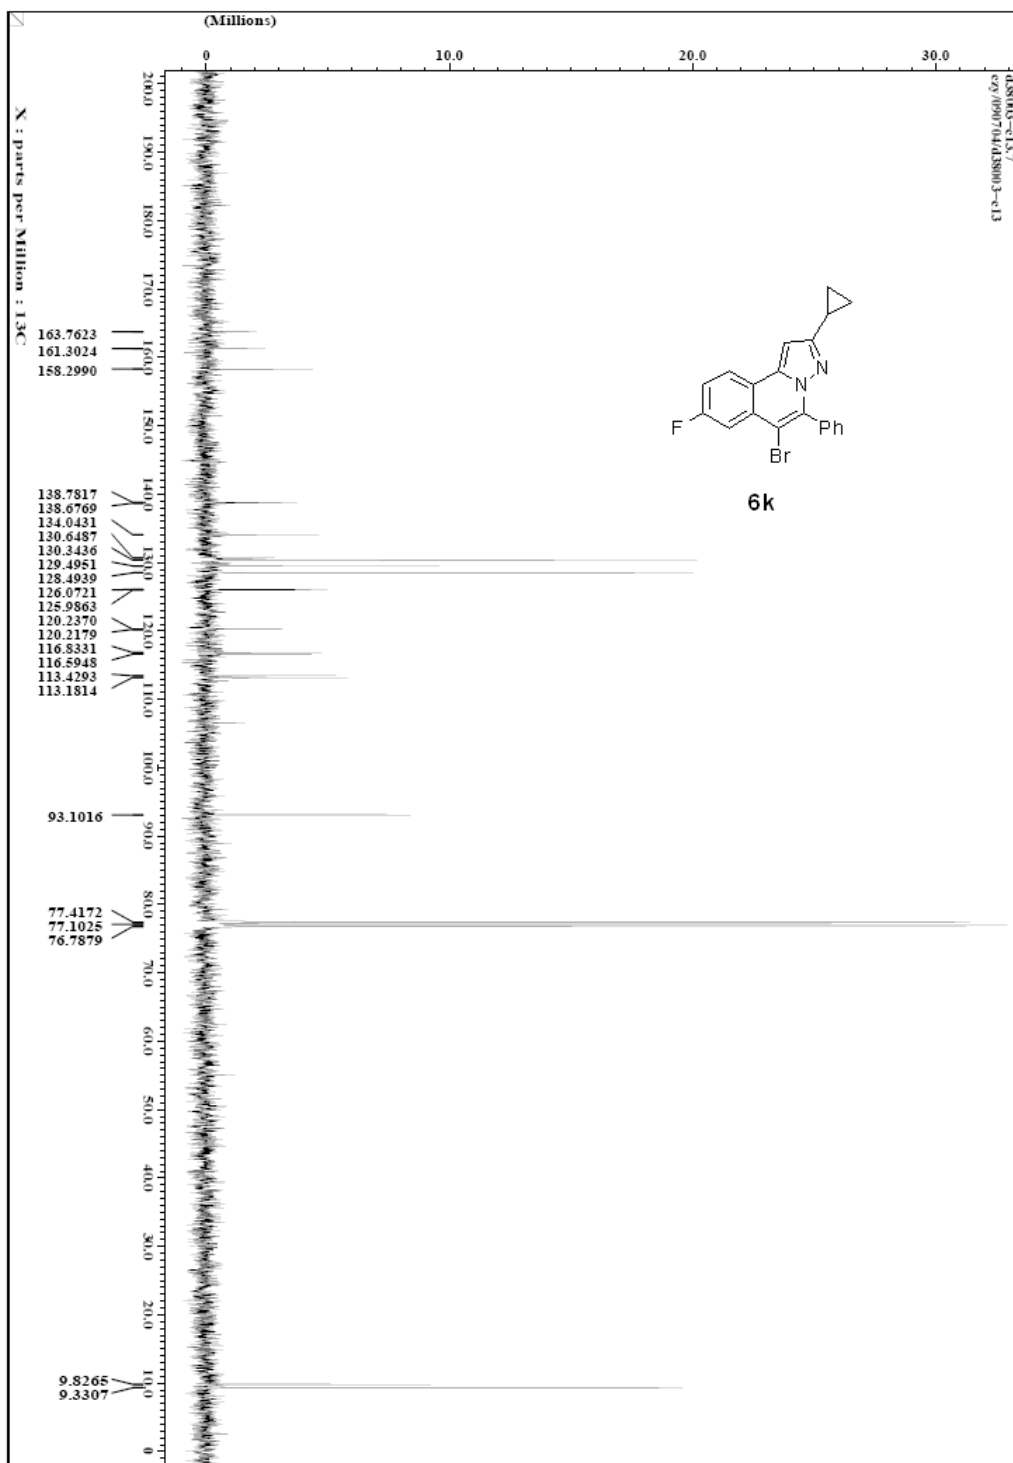

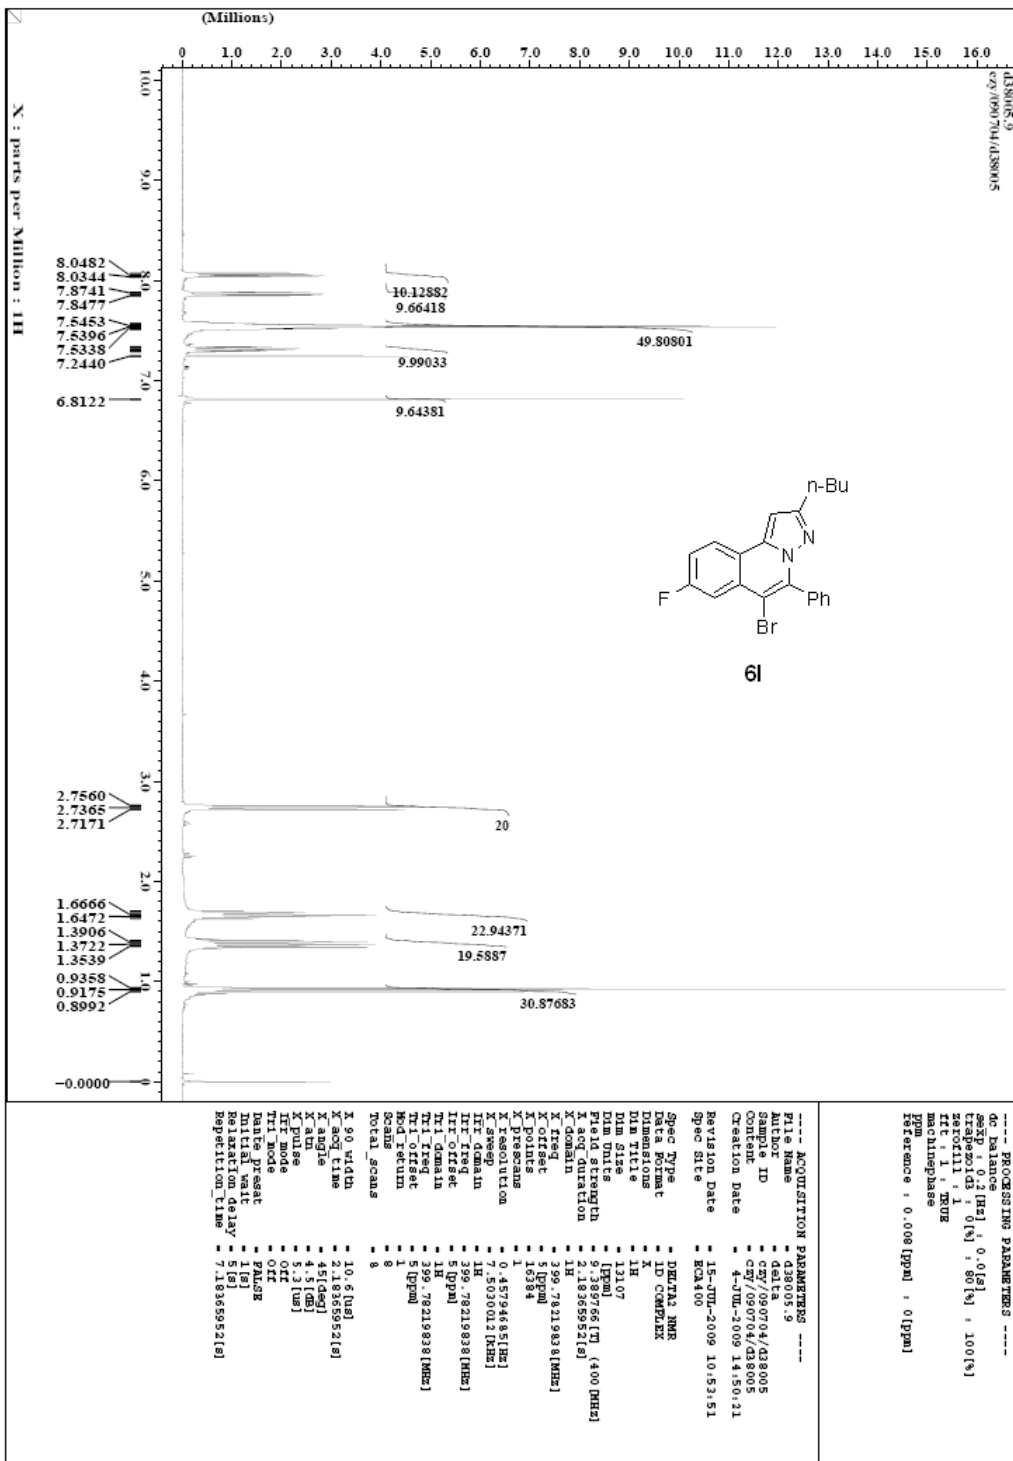

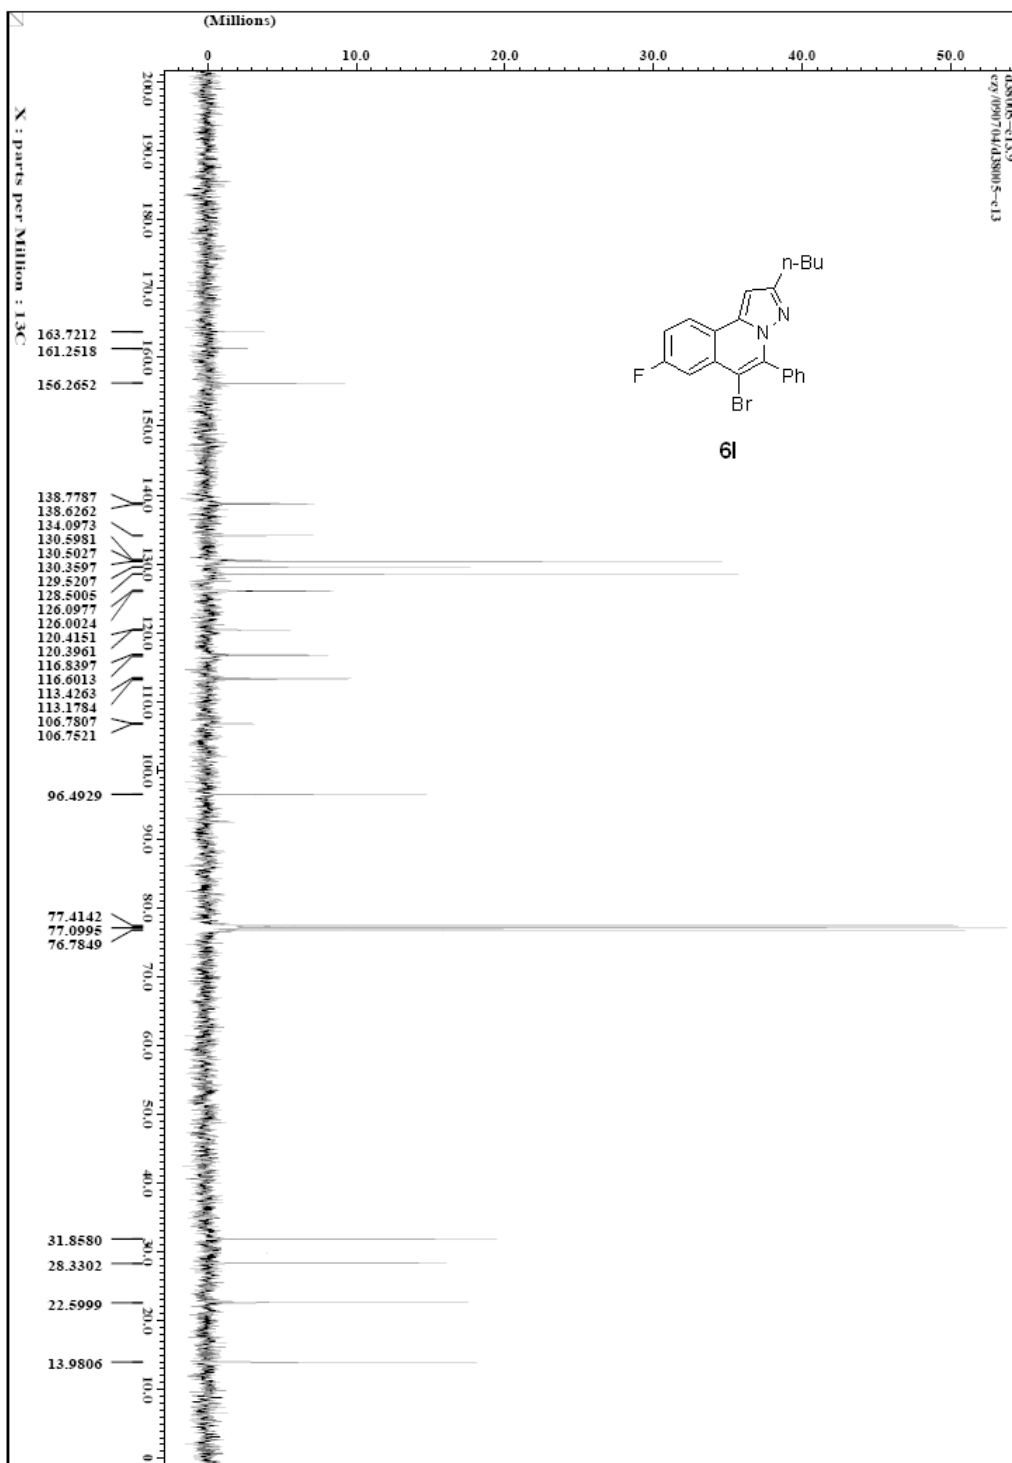

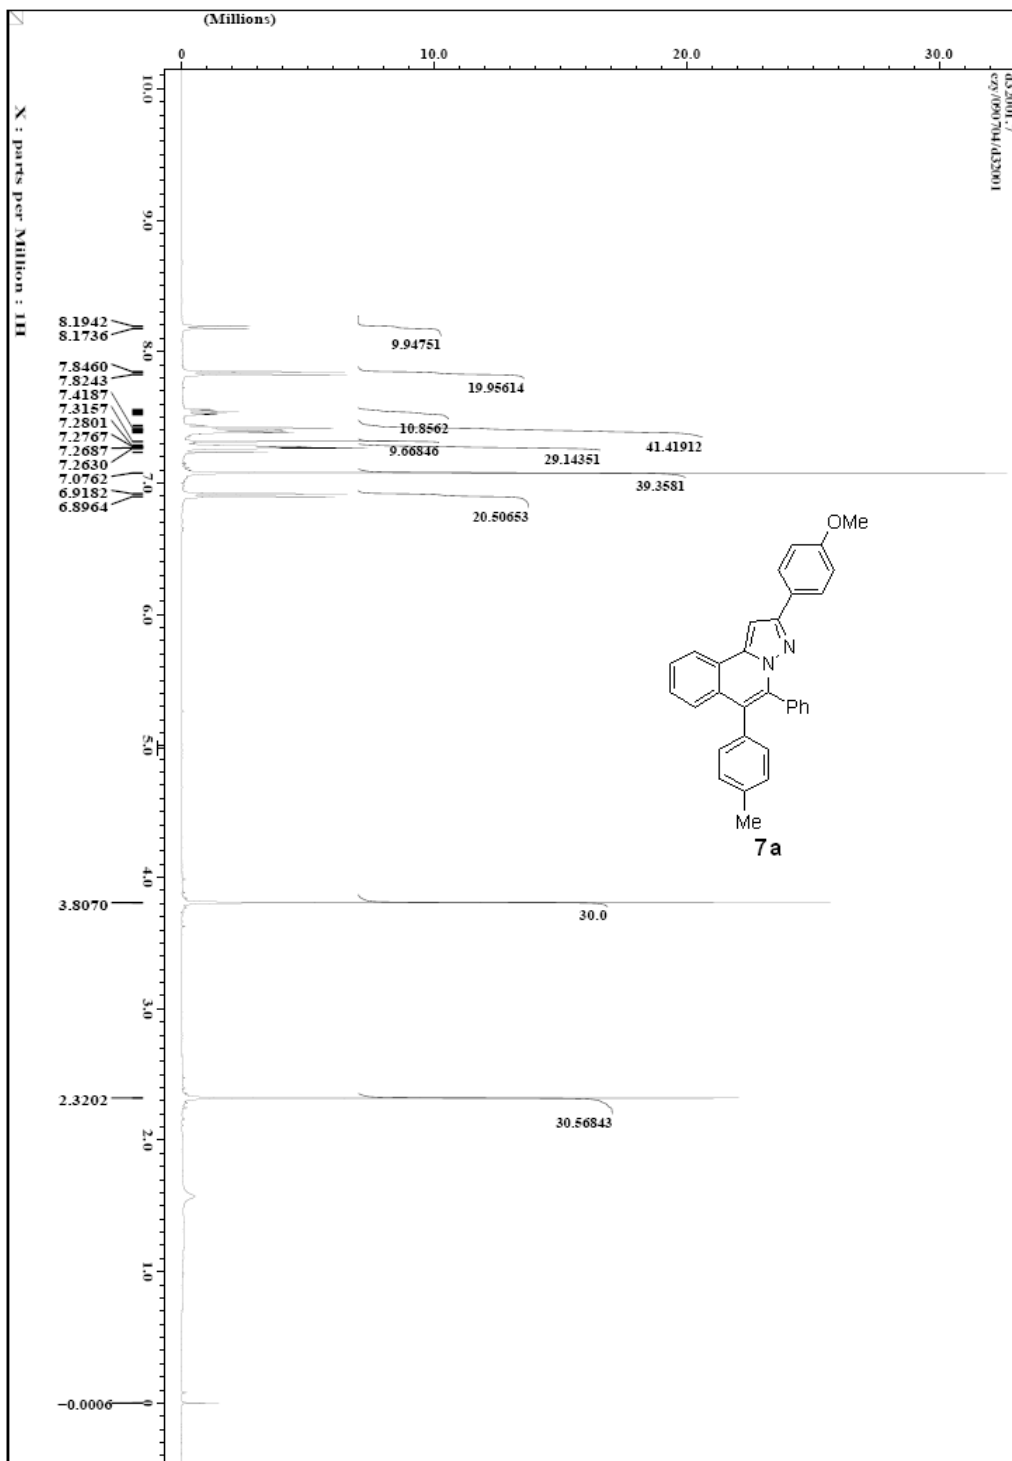

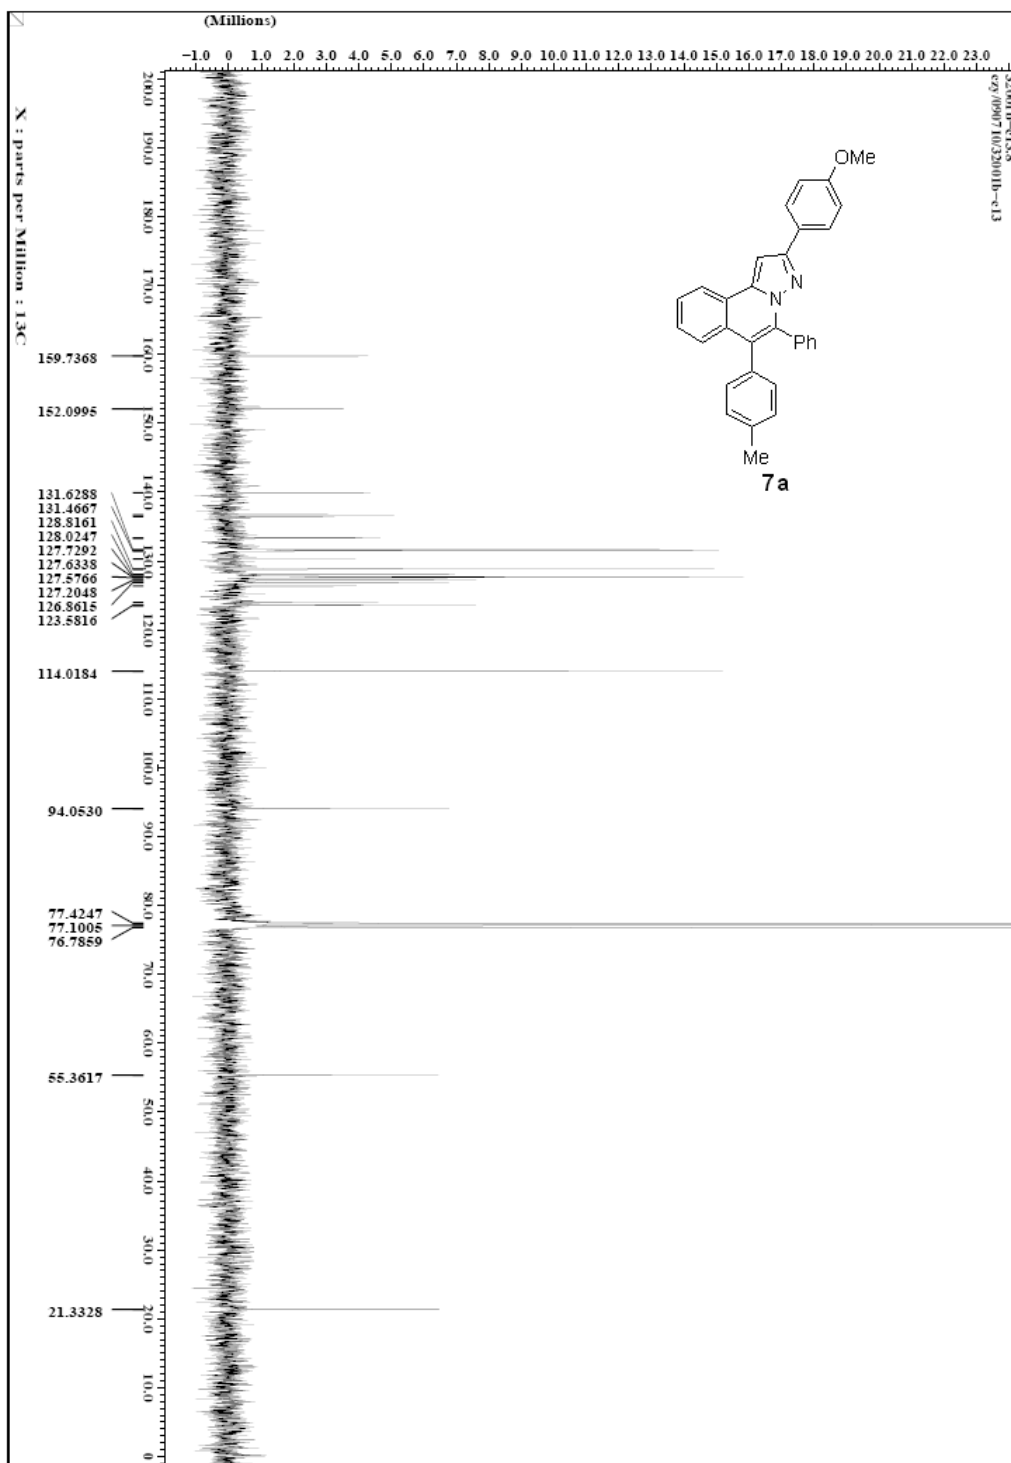

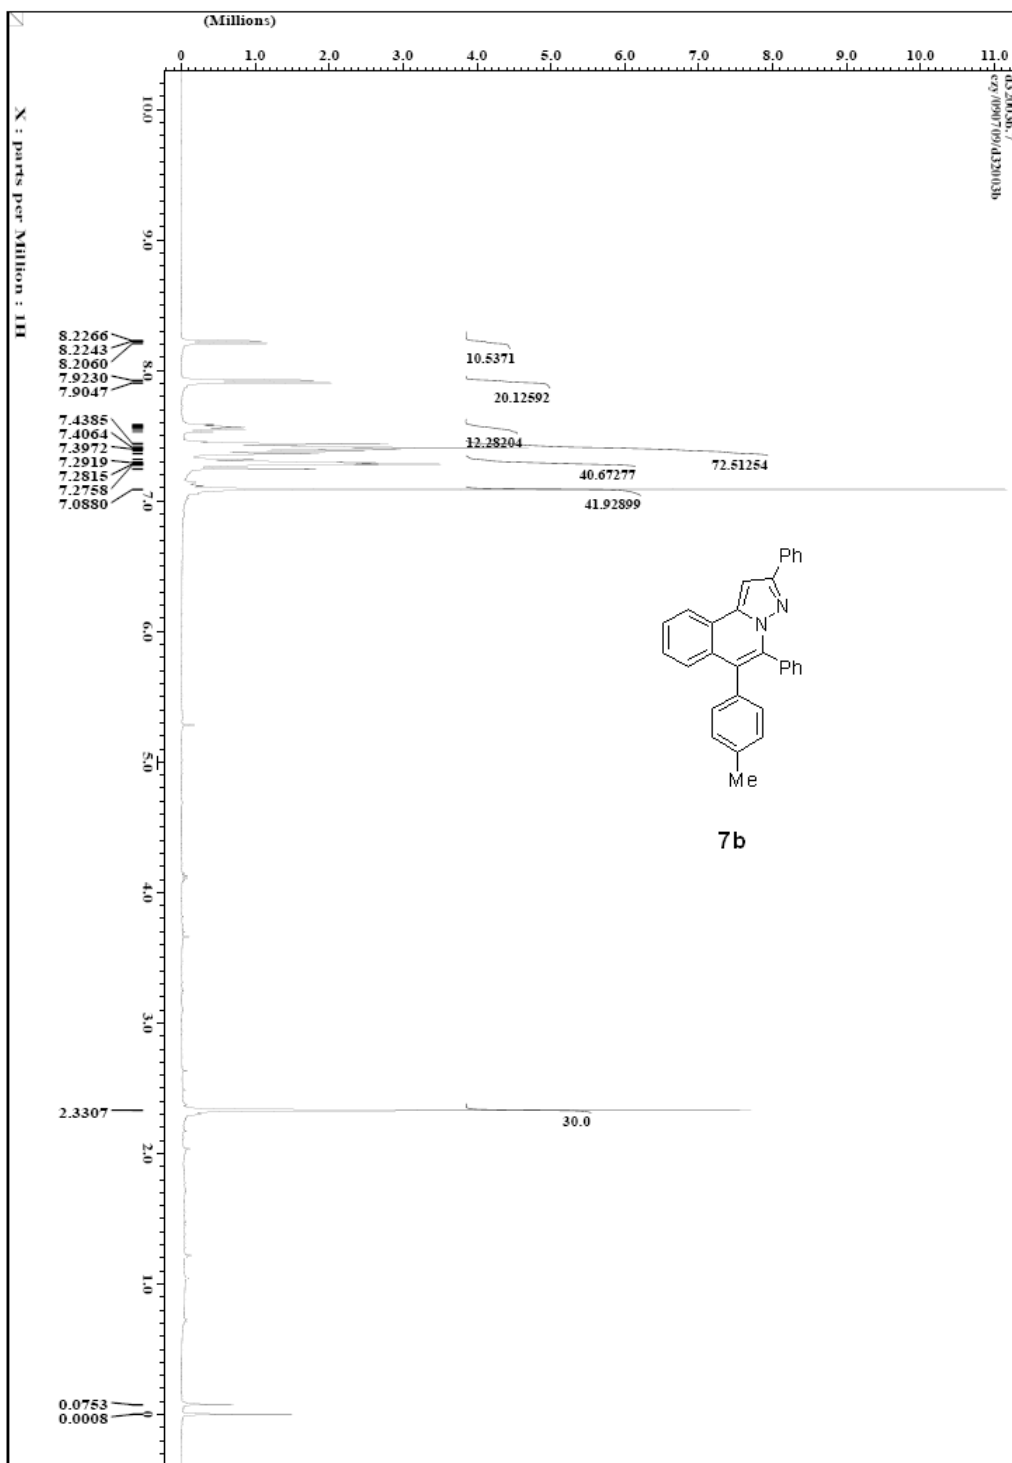



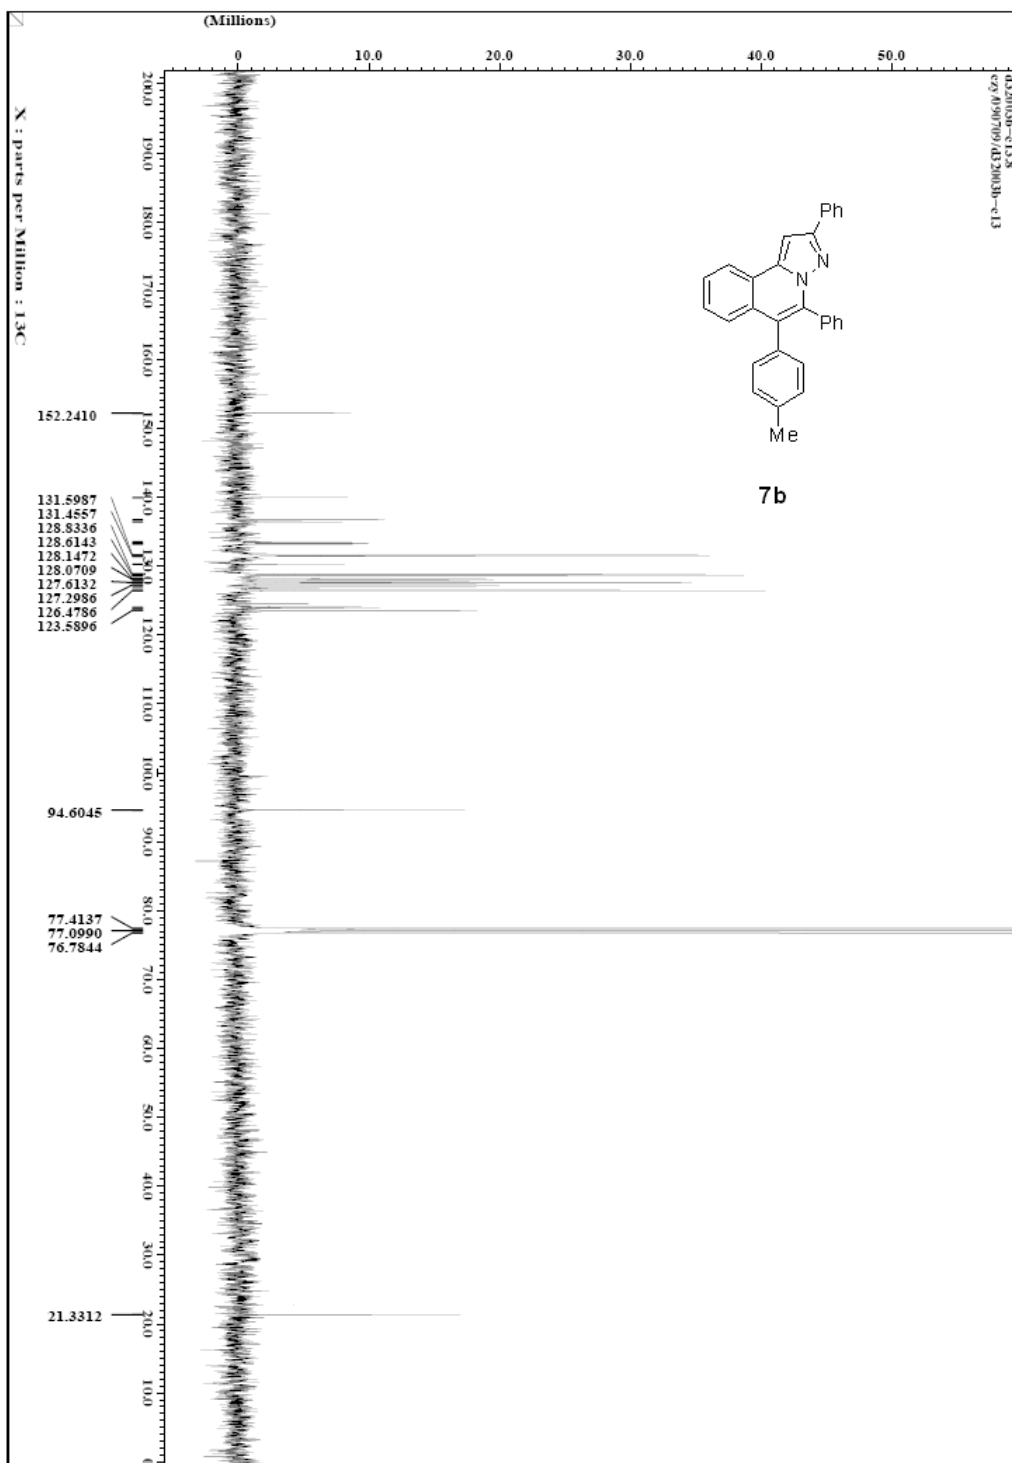

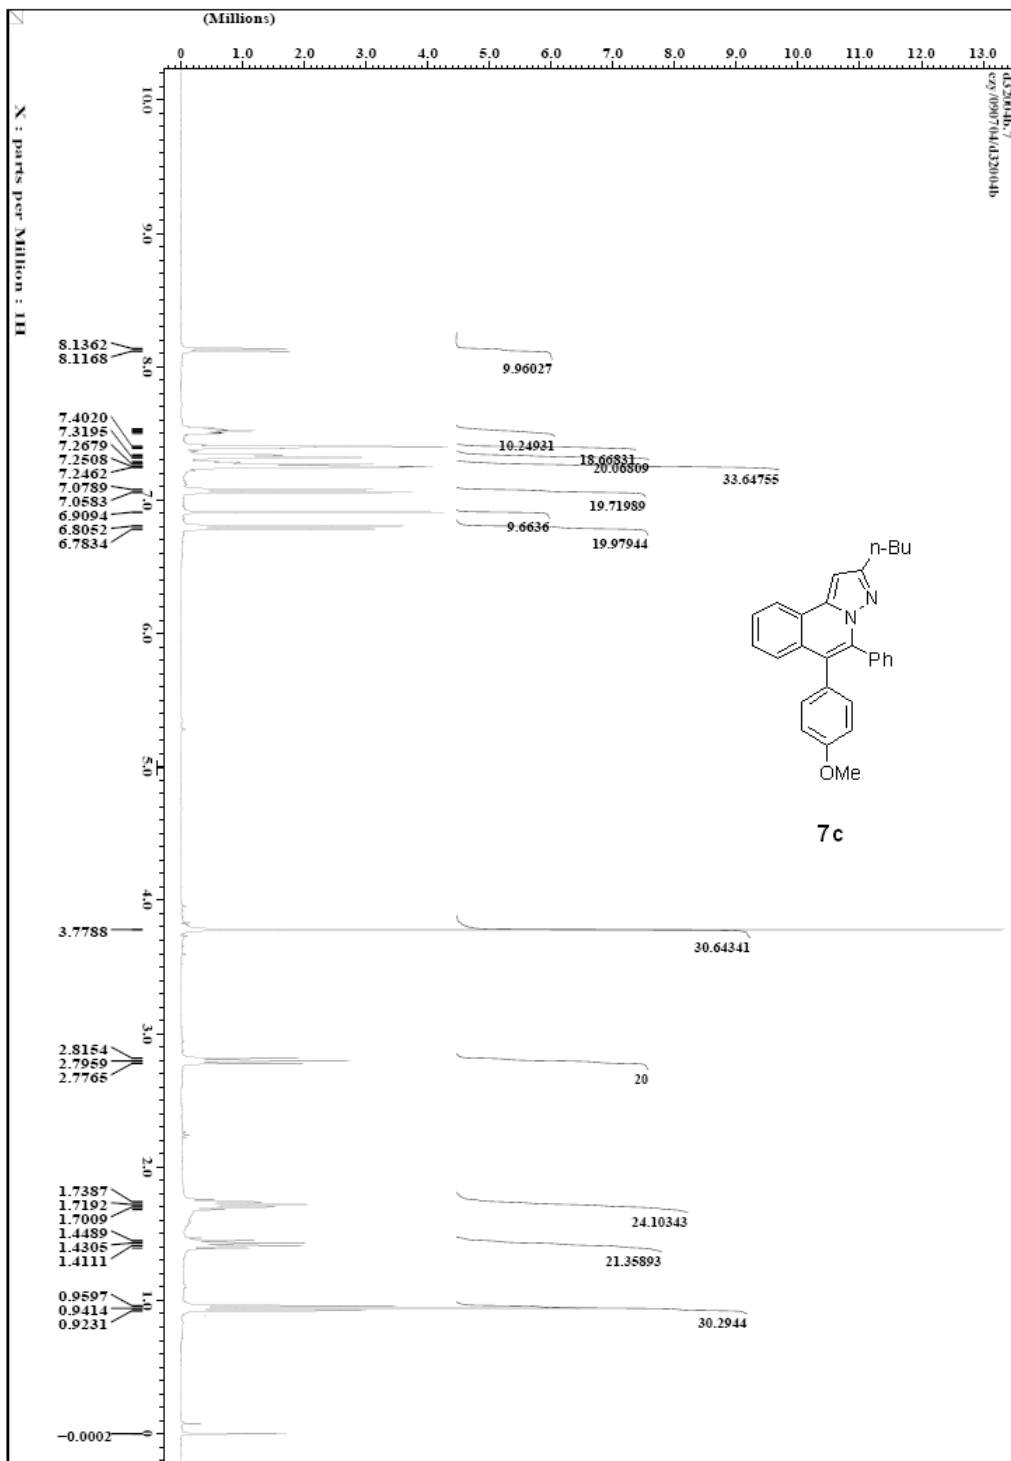

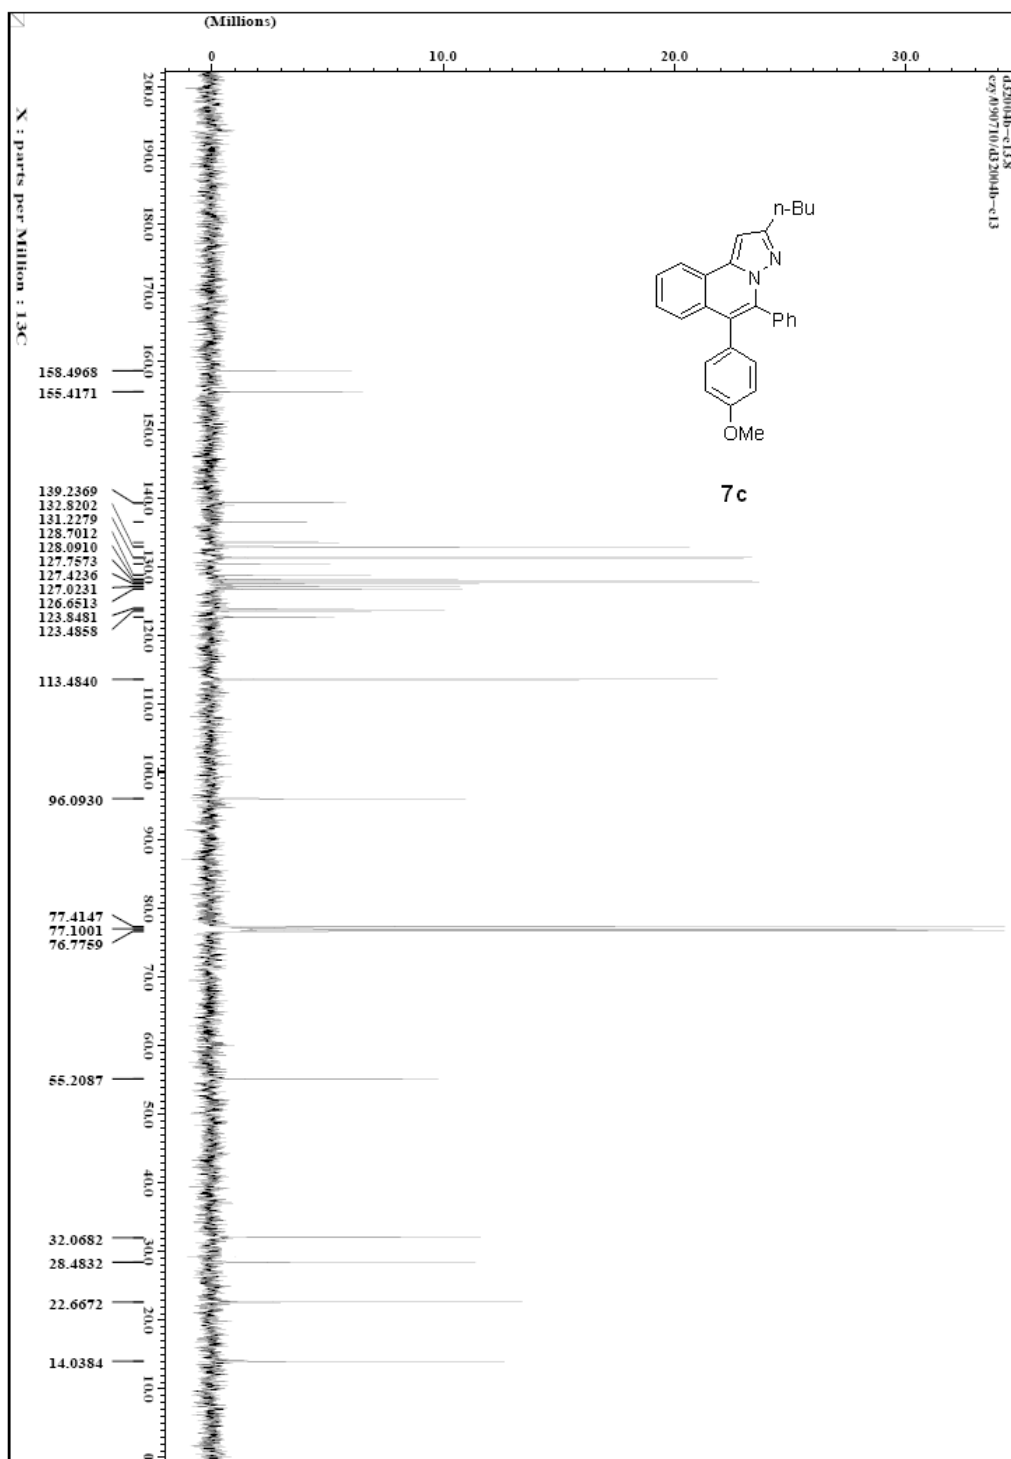

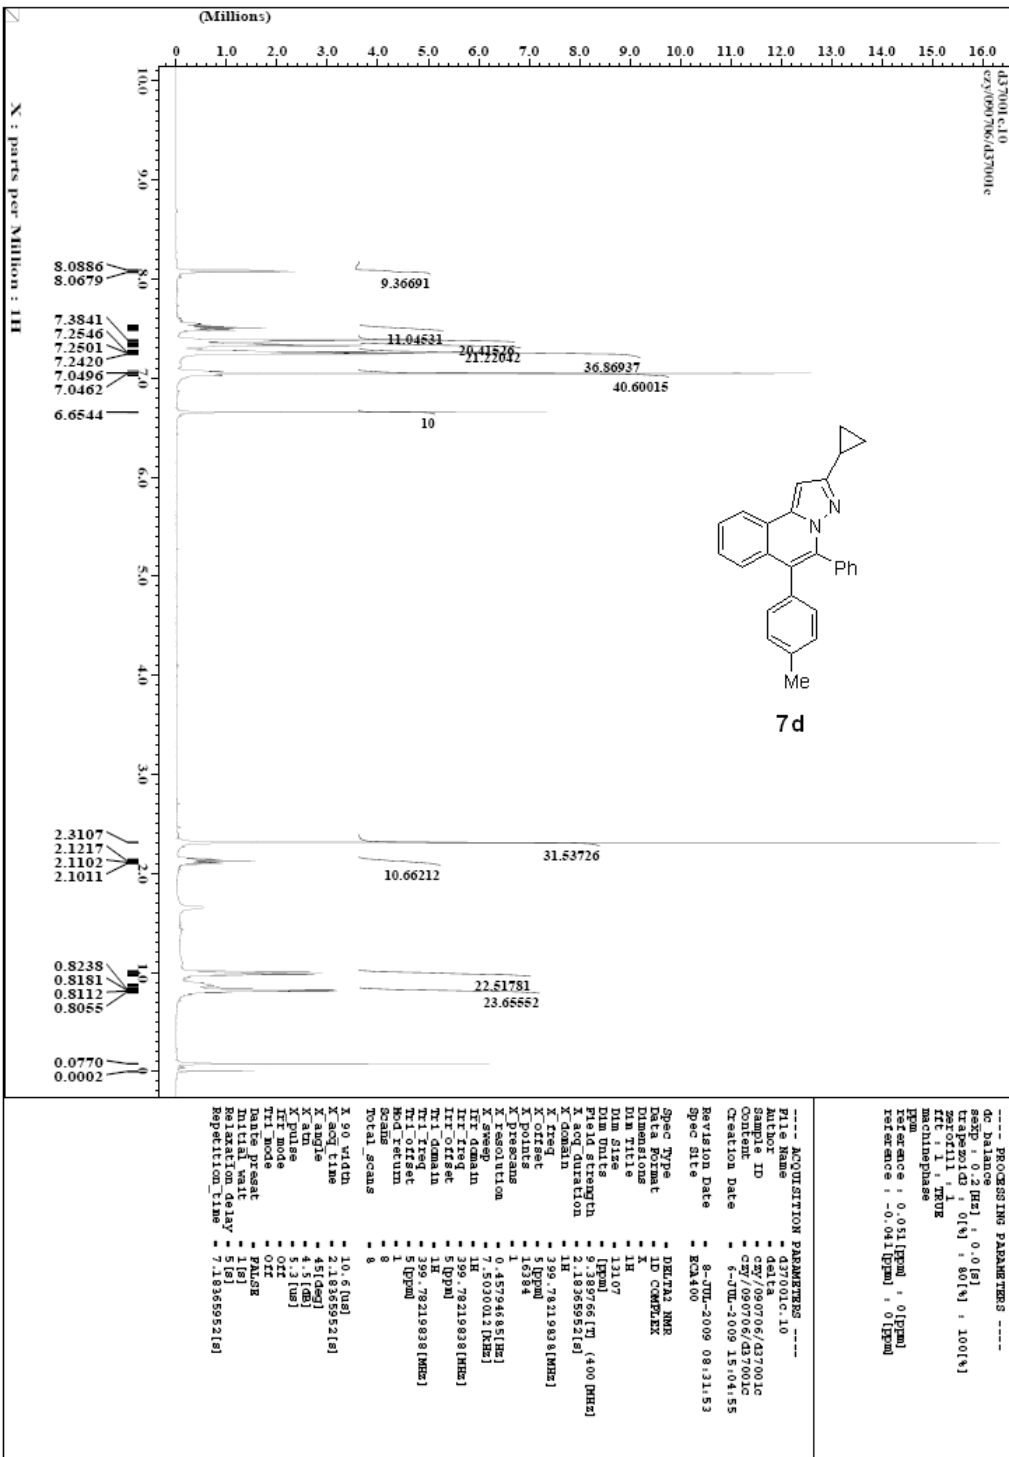

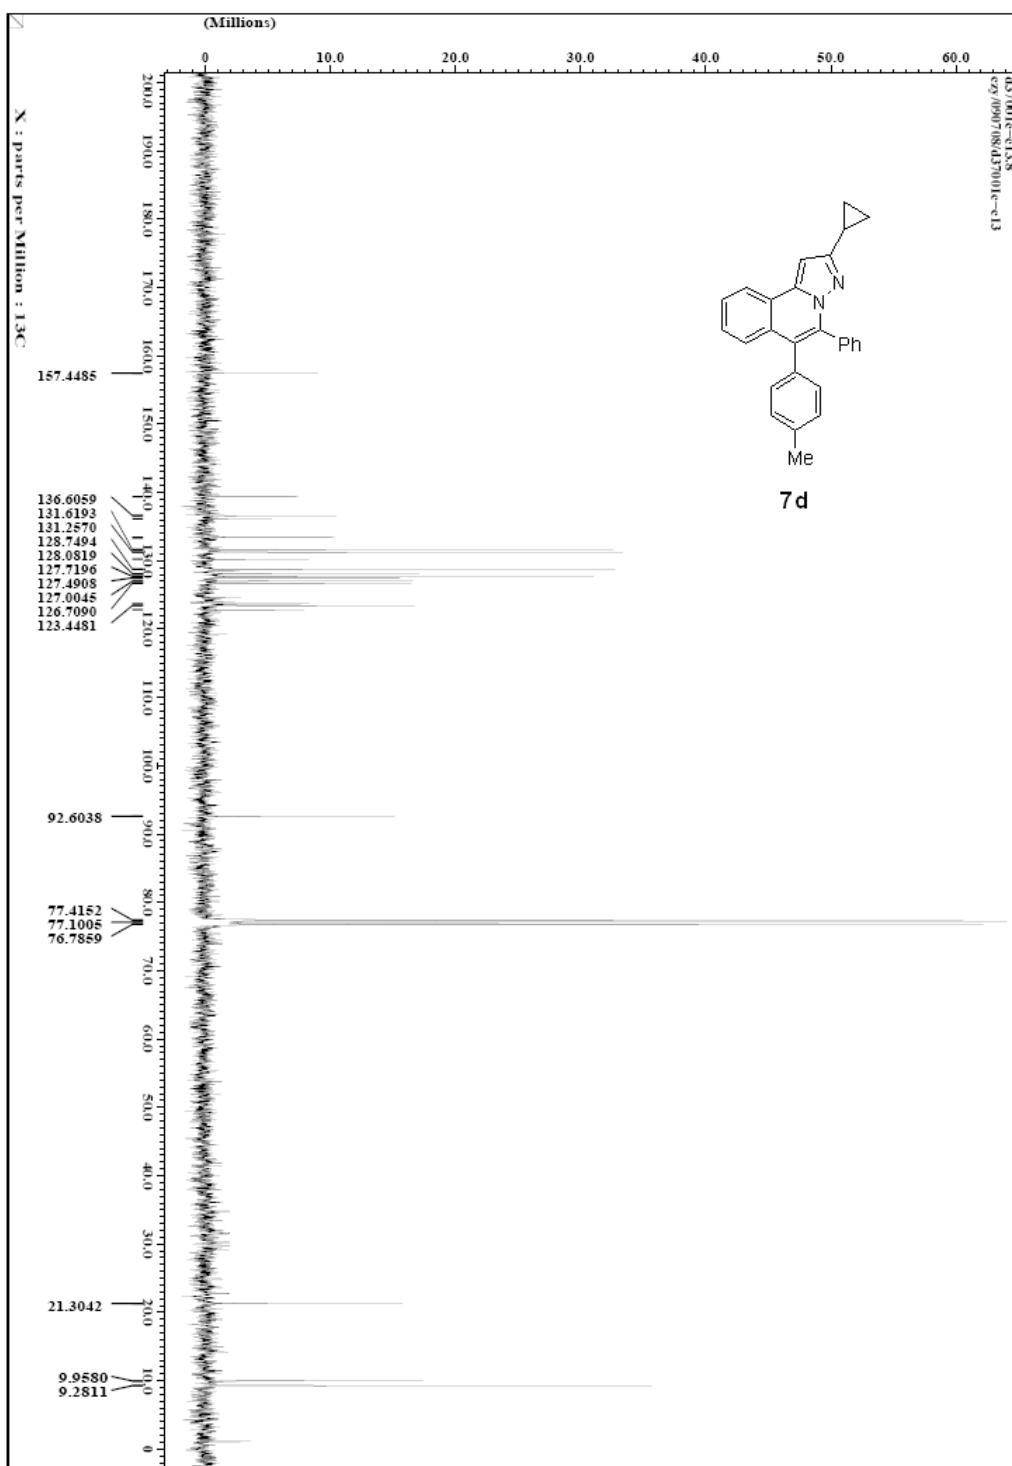

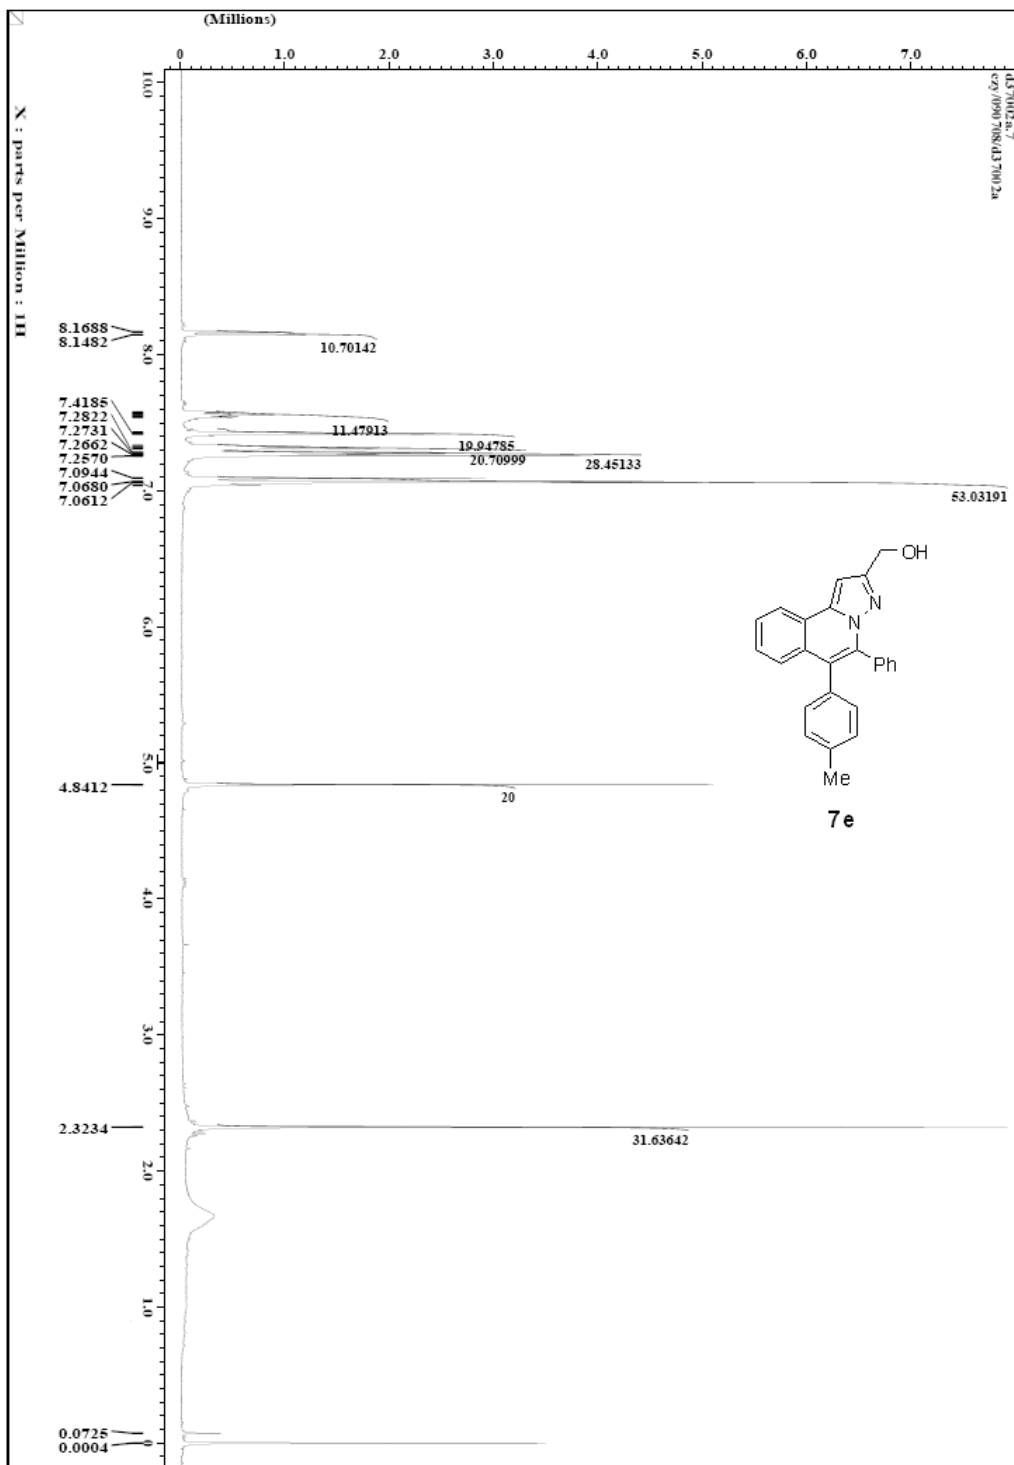

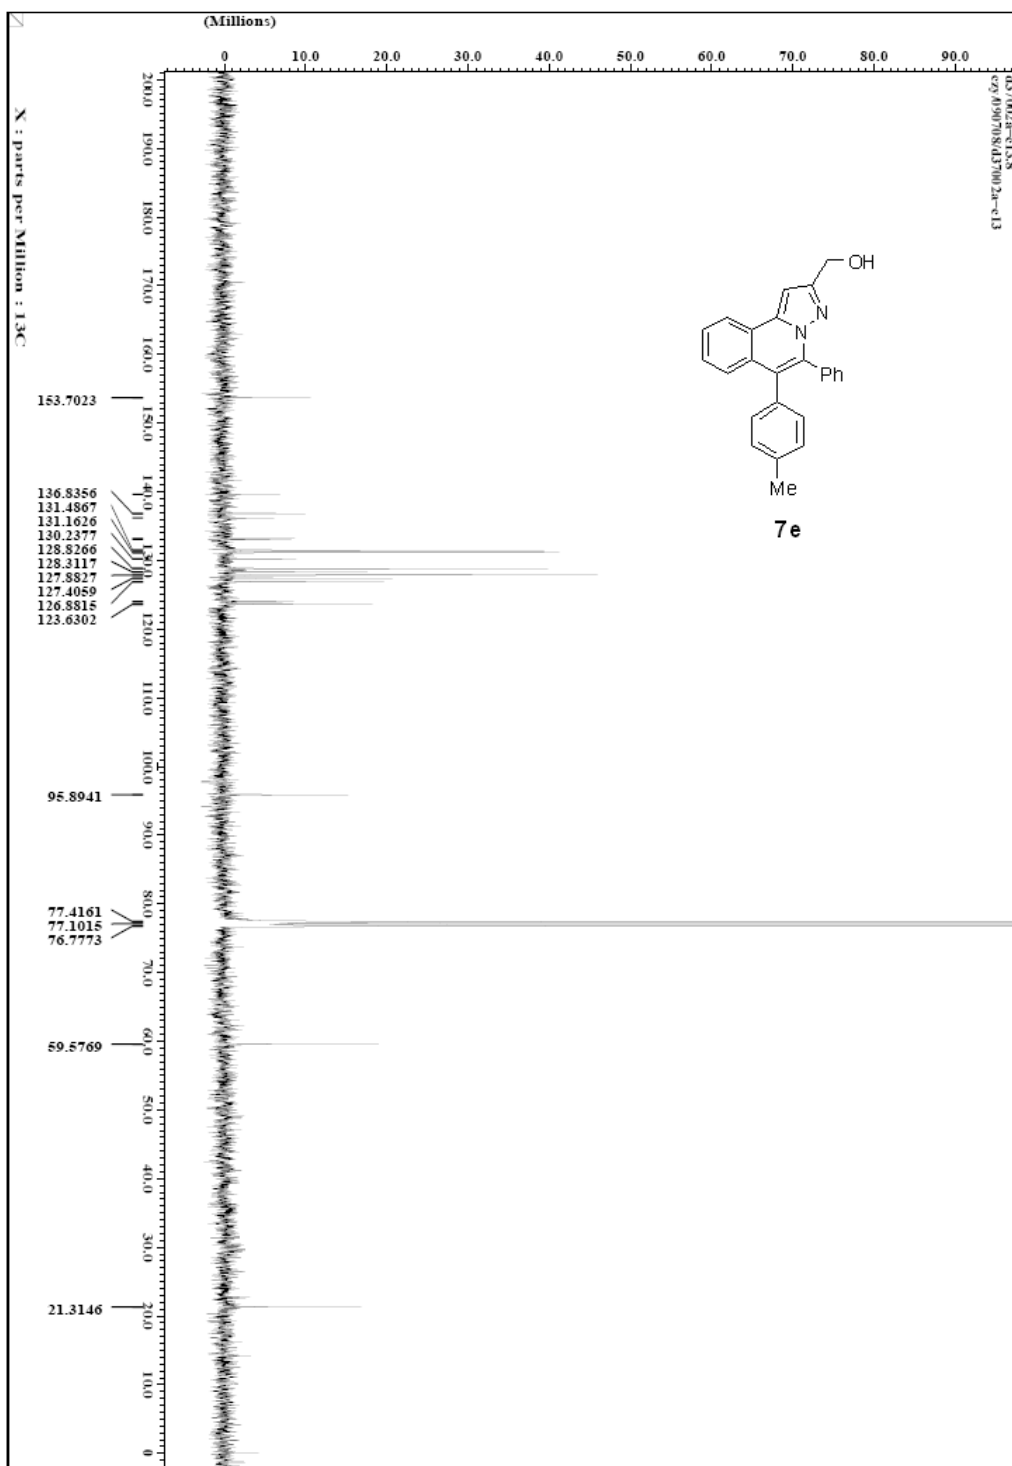

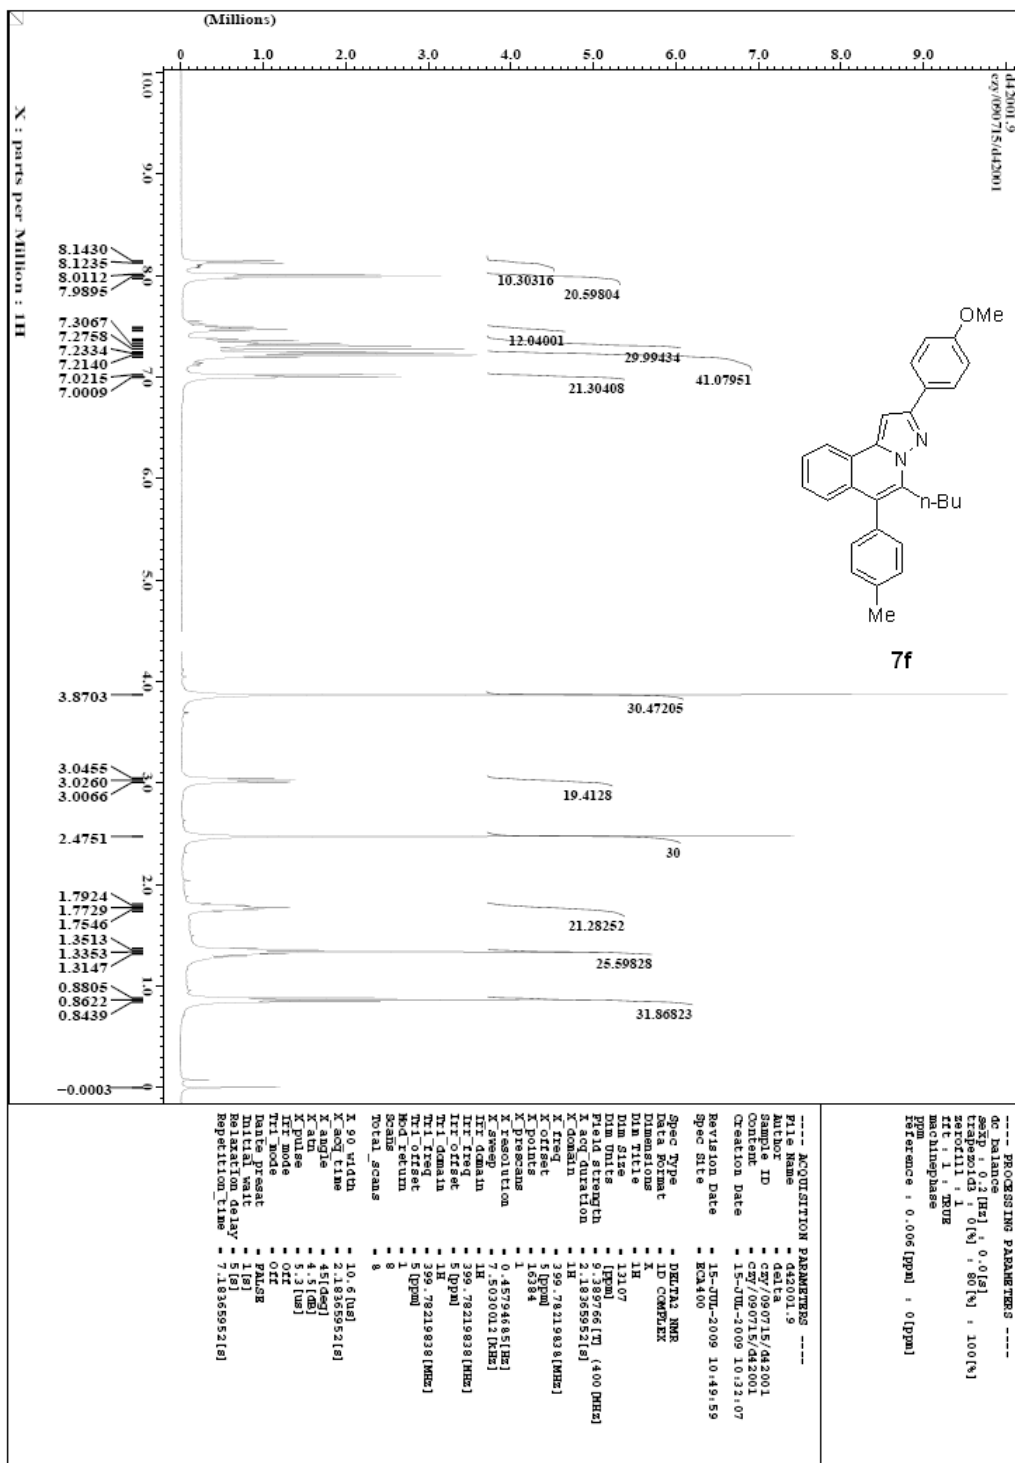



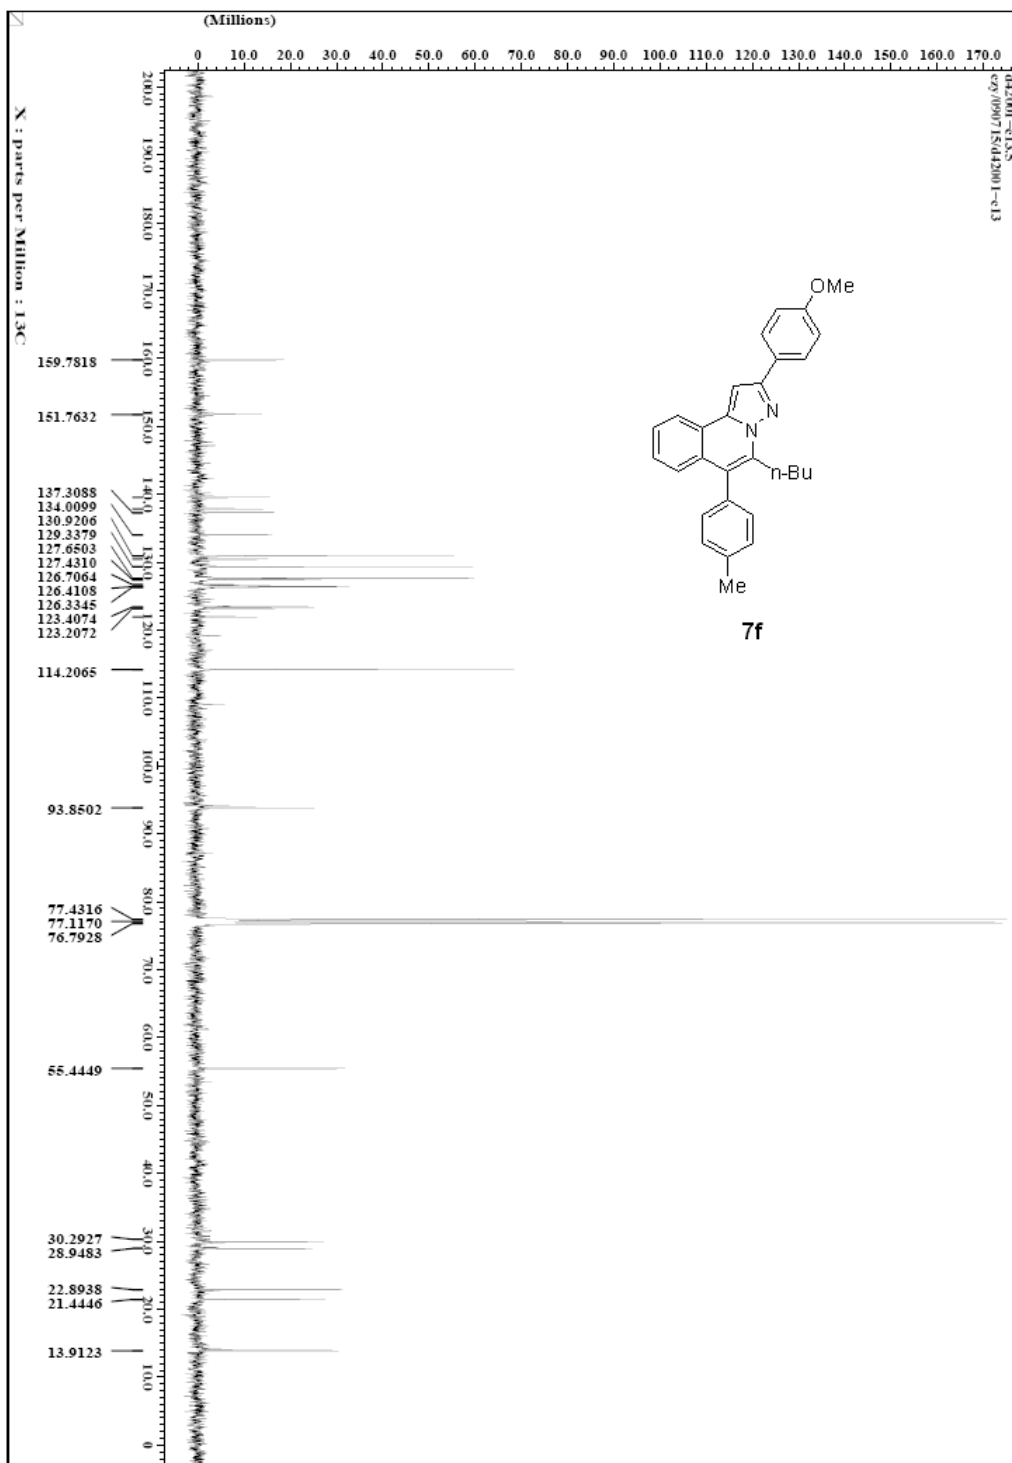



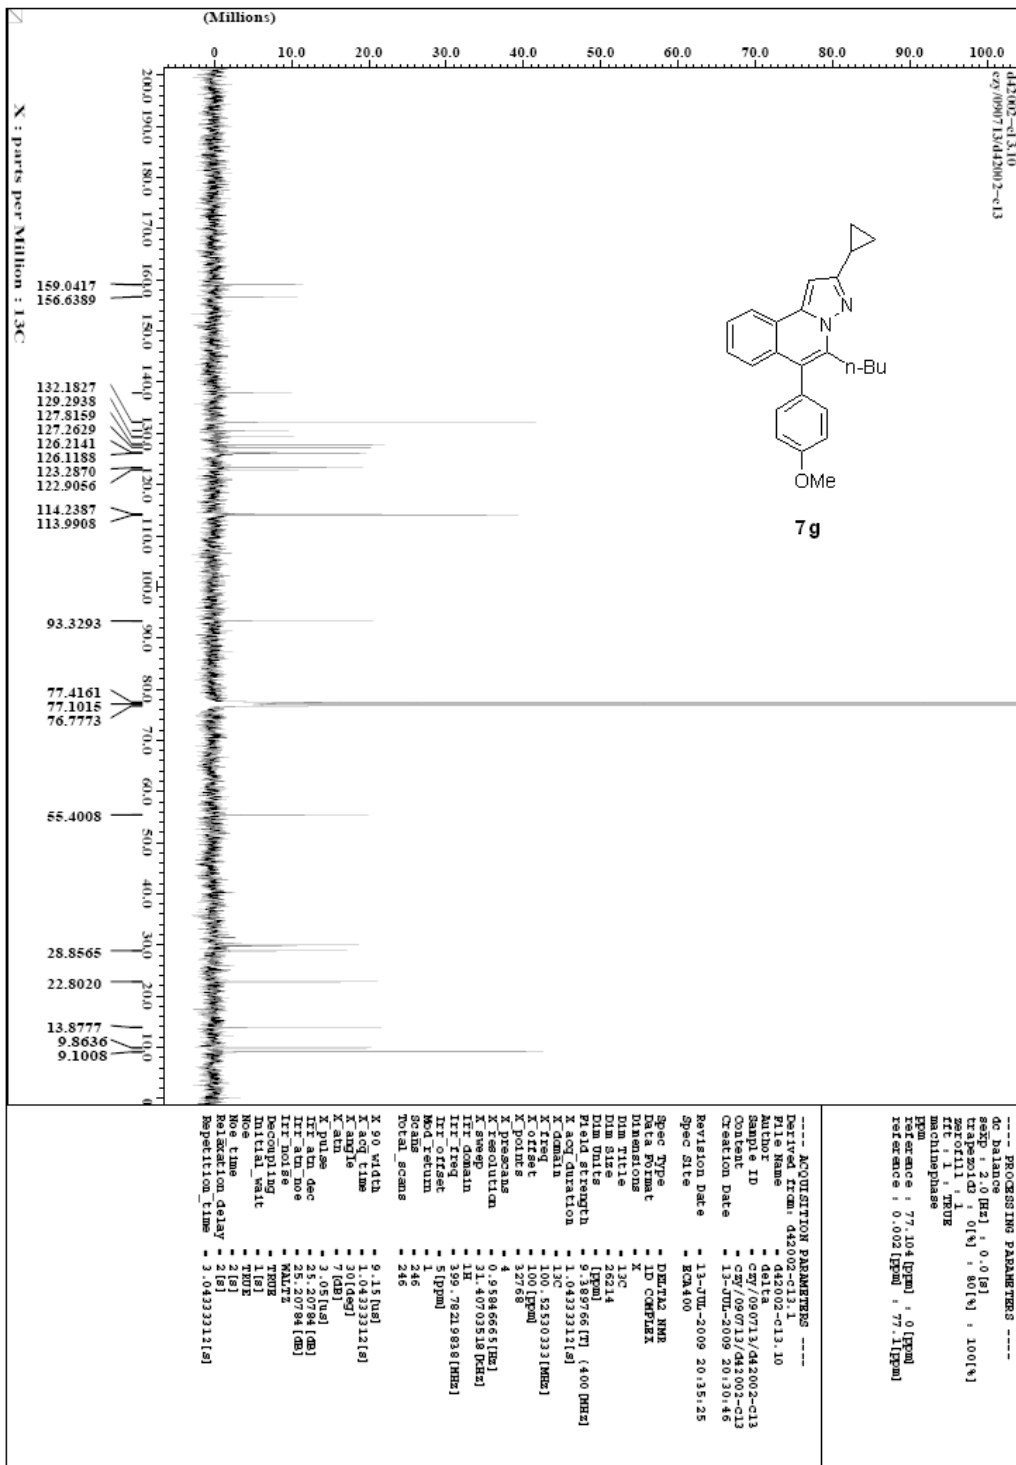

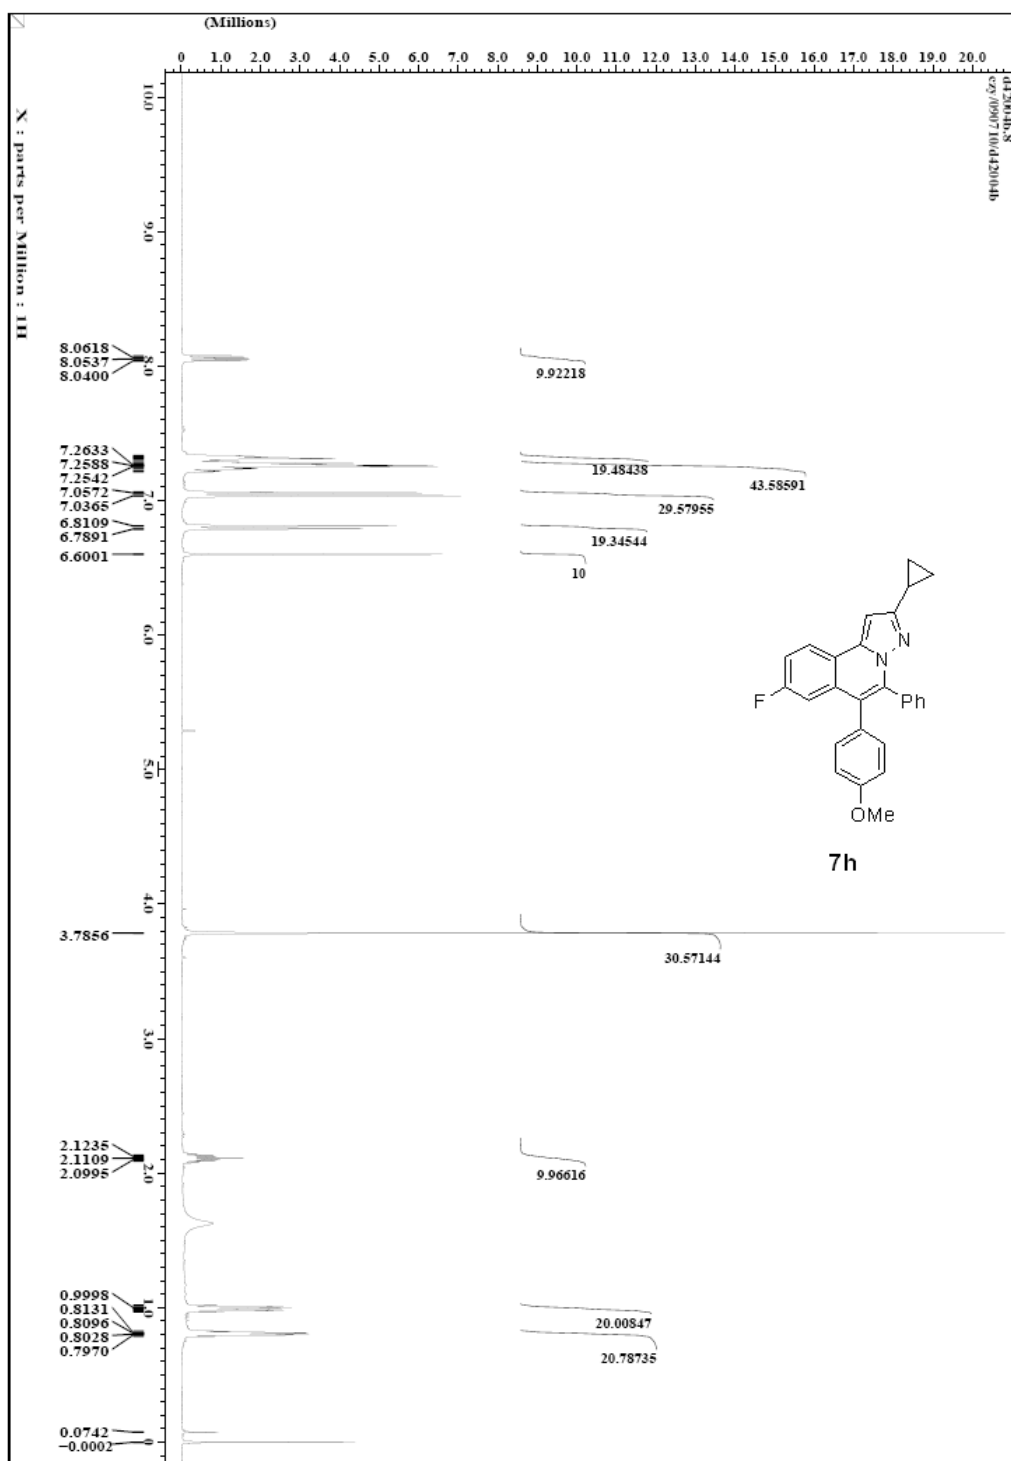

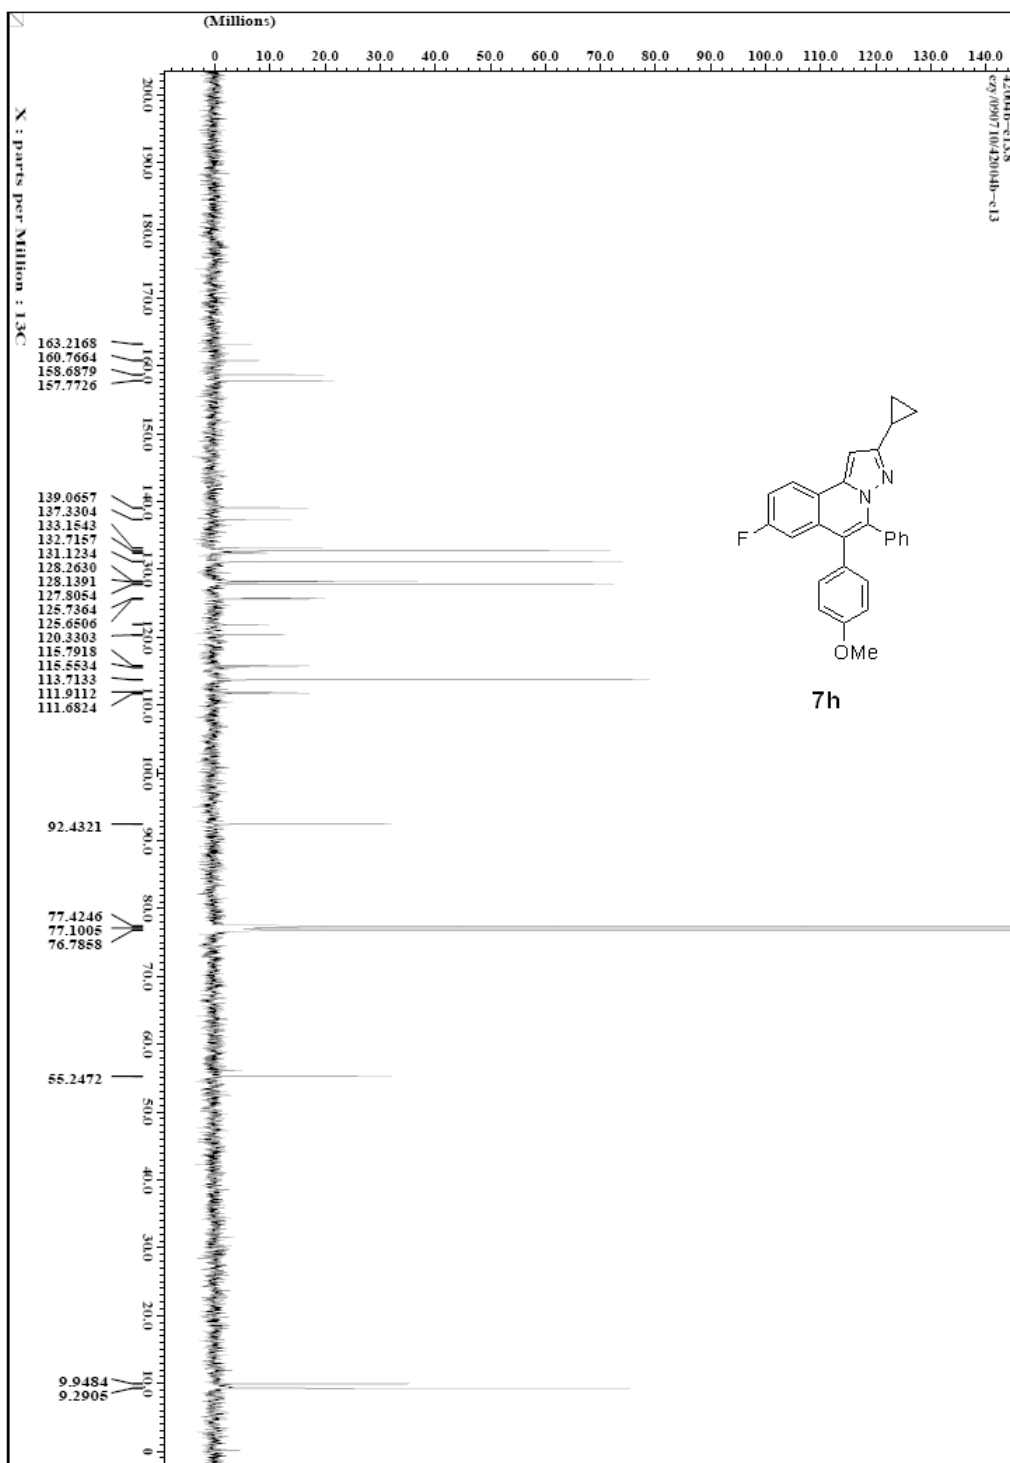

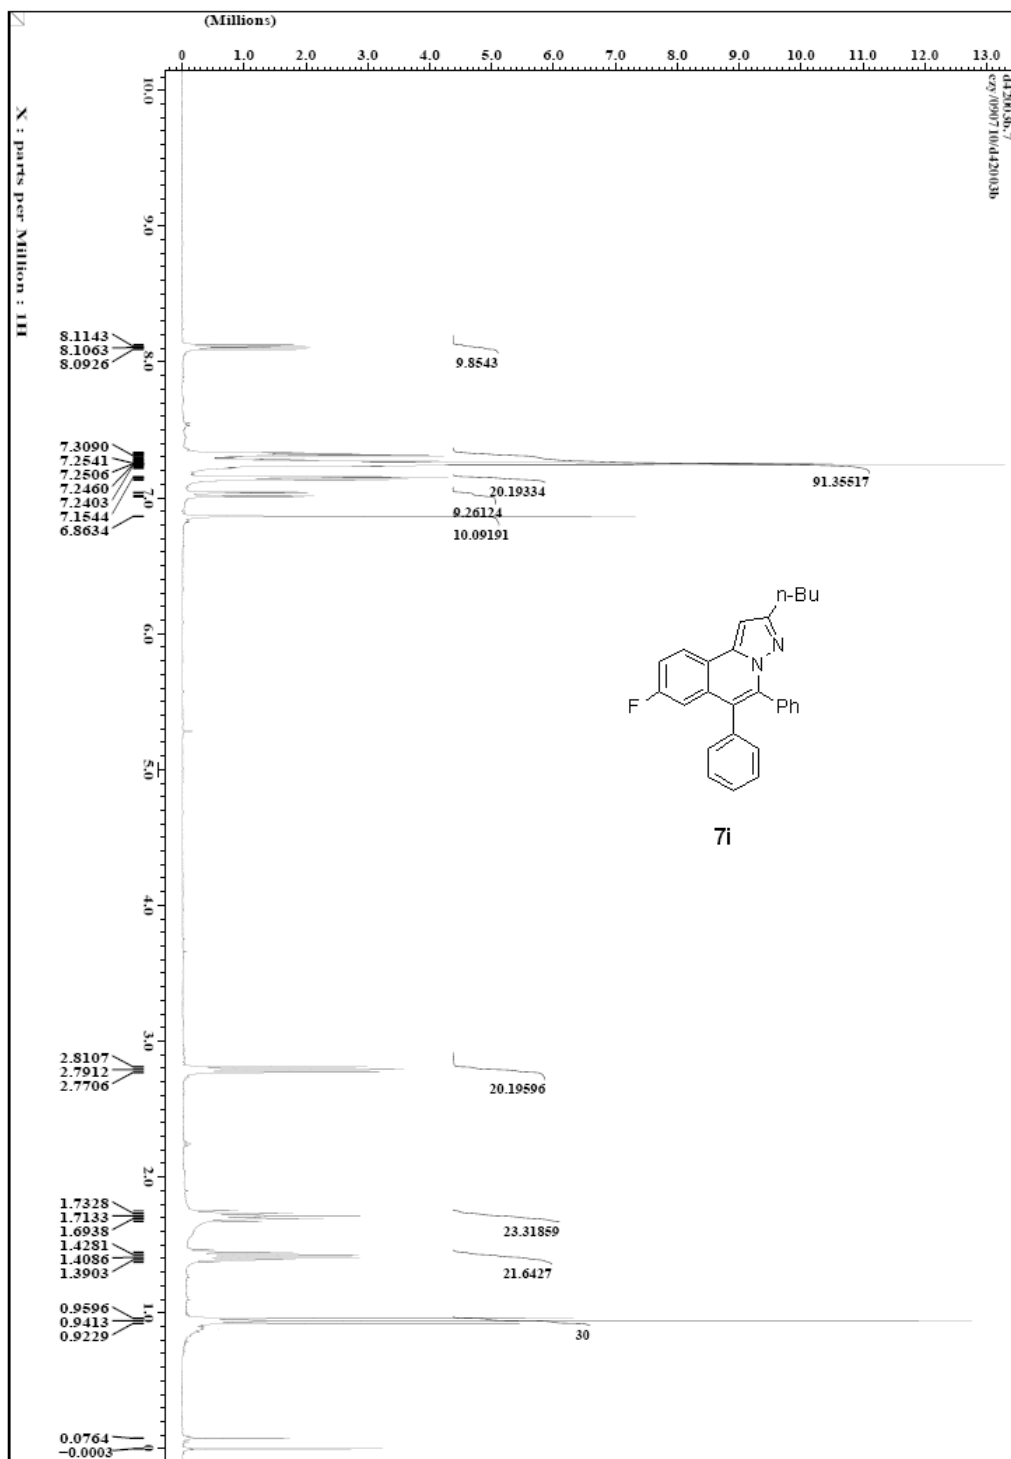

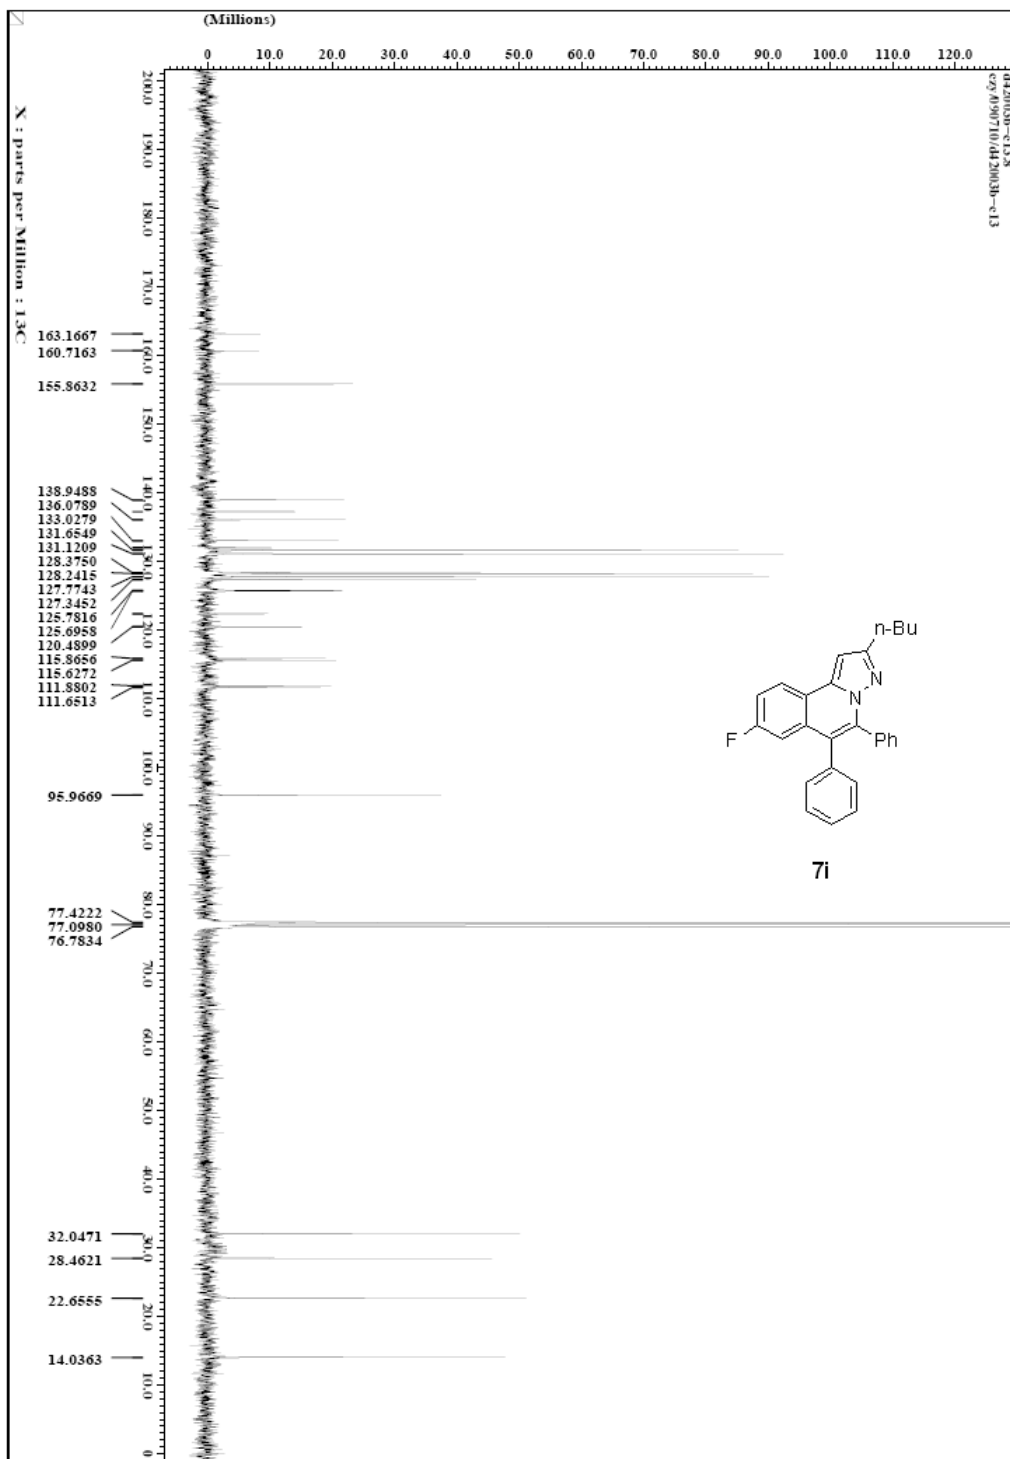

Supplement: b914265g.pdf [file b914265g.pdf]
